# Supplementary material for: Design and synthesis of anthracene-based bispyridinium amides: anion binding, cell staining and DNA interaction studies
Source: Royal Society of Chemistry journal article supplement (doi:10.1039/c2nj21024j), 2012-01-01
Supplement: c2nj21024j.pdf [file c2nj21024j.pdf]

## Supporting Information

### Design and synthesis of anthracene-based bispyridinium amides: Anion binding, cell staining and their DNA interaction studies

Kumares Ghosh,\*<sup>a</sup> Avik Ranjan Sarkar,<sup>a</sup> Atanu Ghorai,<sup>b</sup> Utpal Ghosh<sup>b</sup>

<sup>[a]</sup>Department of Chemistry, University of Kalyani, Kalyani-741235, India.

<sup>[b]</sup>Department of Biochemistry and Biophysics, University of Kalyani, Kalyani-741235, India.

E-mail : [ghosh\\_k2003@yahoo.co.in](mailto:ghosh_k2003@yahoo.co.in)

#### Table of Contents:

|                                                                                                                                                                                                                                                                                              |     |
|----------------------------------------------------------------------------------------------------------------------------------------------------------------------------------------------------------------------------------------------------------------------------------------------|-----|
| 1. Spectral data for intermediates and receptors 1-4.....                                                                                                                                                                                                                                    | S1  |
| 2. Change in fluorescence and absorption spectra of 1-4 with anions<br>in CH <sub>3</sub> CN. (Selected) .....                                                                                                                                                                               | S14 |
| 3. Job plots of receptor 1-4 by fluorescence and UV-vis method.....                                                                                                                                                                                                                          | S24 |
| 4. Binding constant curves from fluorescence and UV-vis for receptor<br>1-4 with anions (Selected) .....                                                                                                                                                                                     | S26 |
| 5. Reversibility experiment of receptor 2 -4 for H <sub>2</sub> PO <sub>4</sub> <sup>-</sup> in CH <sub>3</sub> CN from fluorescence.....                                                                                                                                                    | S29 |
| 6. Change in fluorescence and UV-vis spectra of 3 and 4 with<br>dicarboxylates in CH <sub>3</sub> CN .....                                                                                                                                                                                   | S30 |
| 7. Change in absorption with host to guest ration for receptor 1-4 with<br>dicarboxylate at 371 nm in CH <sub>3</sub> CN.....                                                                                                                                                                | S34 |
| 8. Binding constant curves of 3 and 4 with dicarboxylates from fluorescence in<br>CH <sub>3</sub> CN .....                                                                                                                                                                                   | S36 |
| 9. Emission and UV-vis titration curves for receptor 1-4 with sodium salt of H <sub>2</sub> PO <sub>4</sub> <sup>-</sup> , HPO <sub>4</sub> <sup>2-</sup><br>and PO <sub>4</sub> <sup>3-</sup> In 4:1 (v/v) CH <sub>3</sub> CN:H <sub>2</sub> O containing 10 mM HEPES buffer (pH= 7.2)..... | S38 |
| 10. Anion binding studies of receptors 1 – 4 with sodium salt of H <sub>2</sub> PO <sub>4</sub> <sup>-</sup> ,<br>HPO <sub>4</sub> <sup>2-</sup> and PO <sub>4</sub> <sup>3-</sup> in 4:1 (v/v) CH <sub>3</sub> CN:H <sub>2</sub> O.....                                                     | S41 |
| 11. Binding constant curves for receptor 1 and 3 with NaH <sub>2</sub> PO <sub>4</sub> and Na <sub>2</sub> HPO <sub>4</sub> from<br>fluorescence in 4:1 (v/v) CH <sub>3</sub> CN:H <sub>2</sub> O containing 10 mM HEPES buffer (pH= 7.2)....                                                | S42 |
| 12. ROESY spectrum in d <sub>6</sub> -DMSO of receptors 1-4.....                                                                                                                                                                                                                             | S43 |
| 13. <sup>1</sup> H NMR of the receptors 2 – 4 in the presence and absence of anions.....                                                                                                                                                                                                     | S45 |
| 14. <sup>31</sup> P of H <sub>2</sub> PO <sub>4</sub> <sup>-</sup> in the presence of 1-4 in d <sub>6</sub> -DMSO.....                                                                                                                                                                       | S47 |
| 15. MO structure of receptors 1-4 and there complexes with 1:1 H <sub>2</sub> PO <sub>4</sub> <sup>-</sup> .....                                                                                                                                                                             | S49 |
| 16. Fixed HeLa cells stained with receptors 1 – 4 and Hoechst dye<br>under- bright-field mode and fluorescence mode.....                                                                                                                                                                     | S53 |
| 17. Gel Retardation Assay (taking calf-thymus DNA).....                                                                                                                                                                                                                                      | S53 |
| 18. CD spectra of receptors 1 – 4.....                                                                                                                                                                                                                                                       | S54 |

## 1. Spectral data of compounds:

### $^1\text{H}$ NMR of 5 (400 MHz, $\text{d}_6\text{-DMSO}$ ):

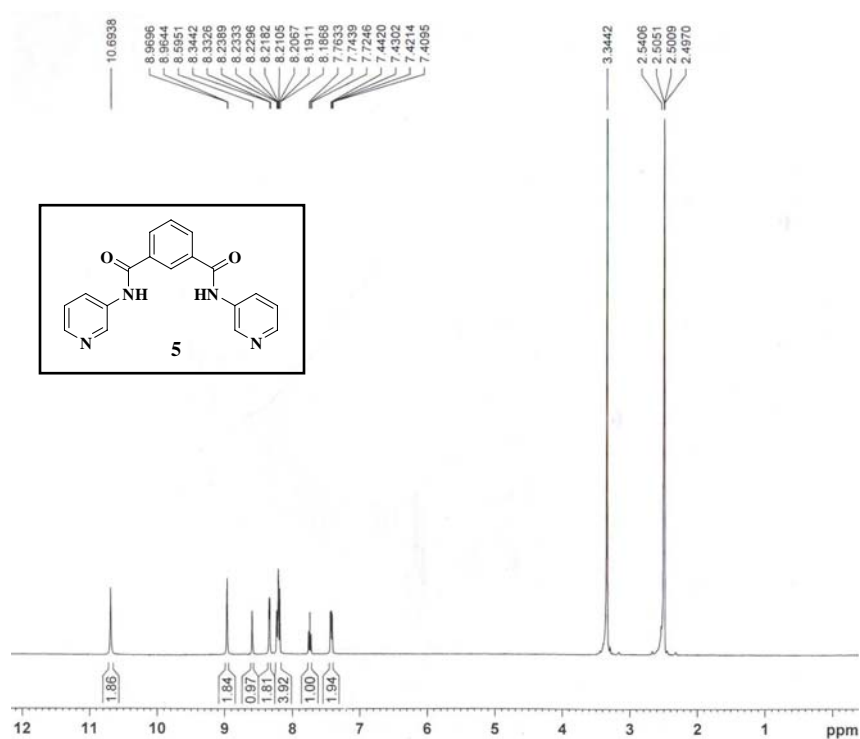

### $^{13}\text{C}$ NMR of 5 (100 MHz, $\text{d}_6\text{-DMSO}$ ):

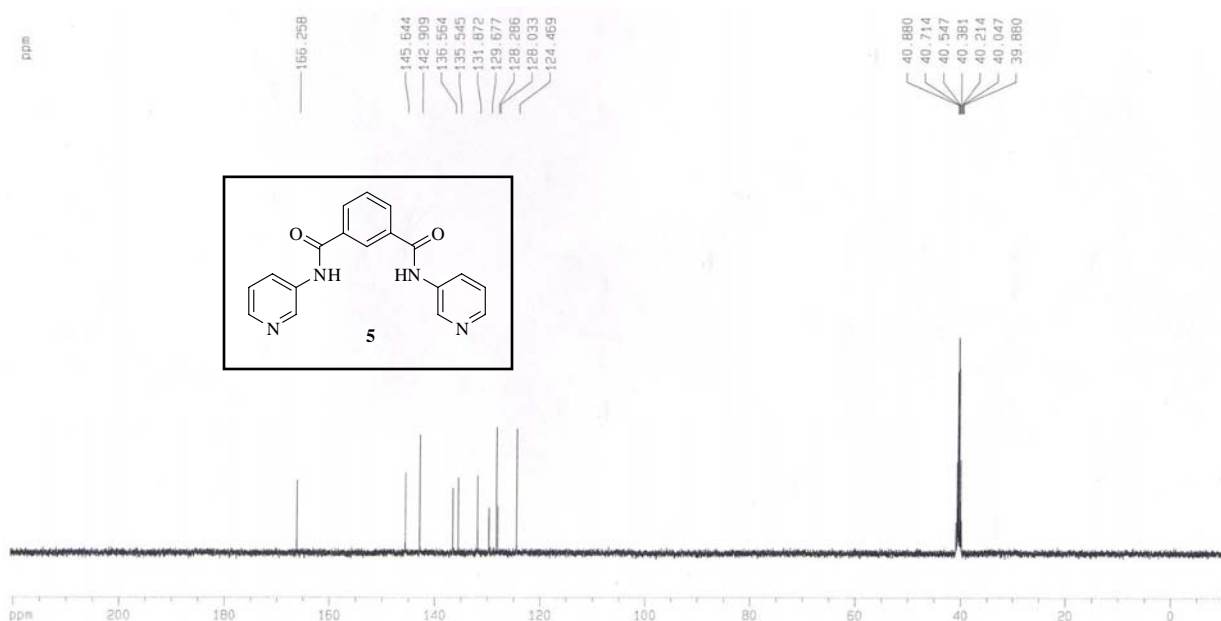

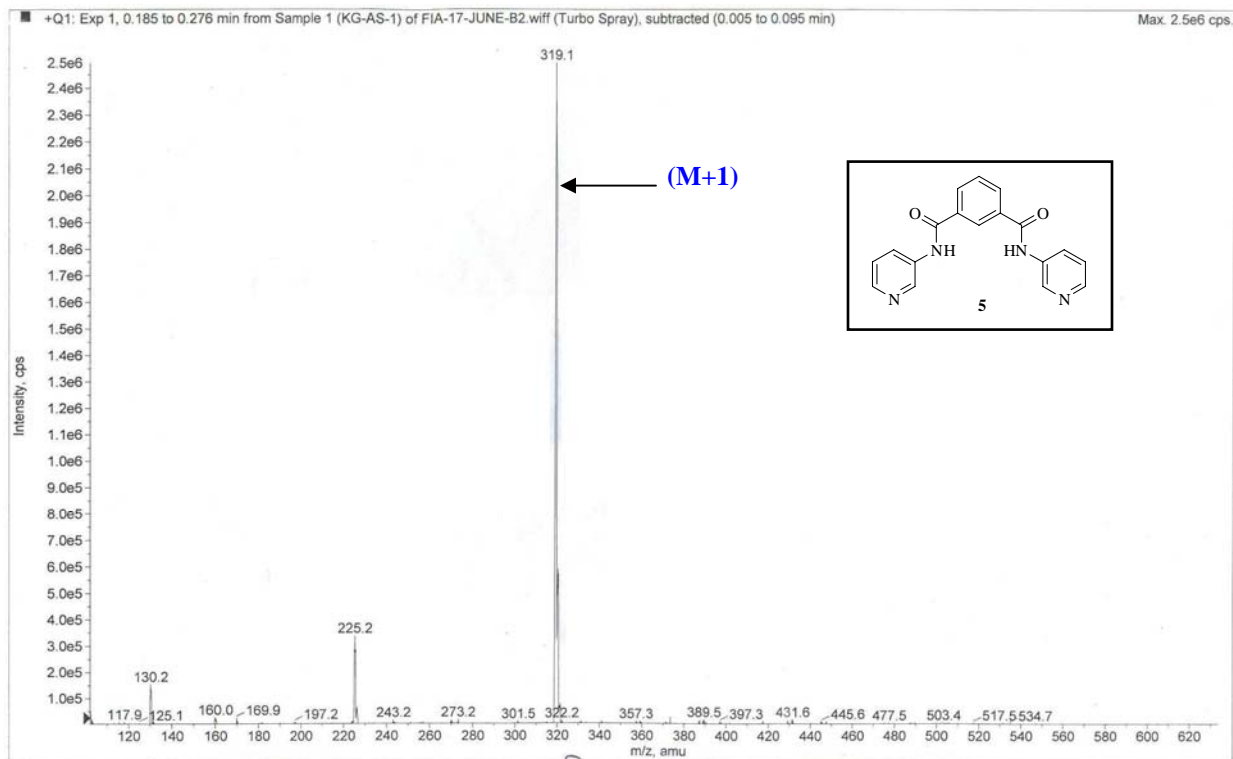

**<sup>1</sup>H NMR of 1 (400 MHz, d<sub>6</sub>-DMSO):**

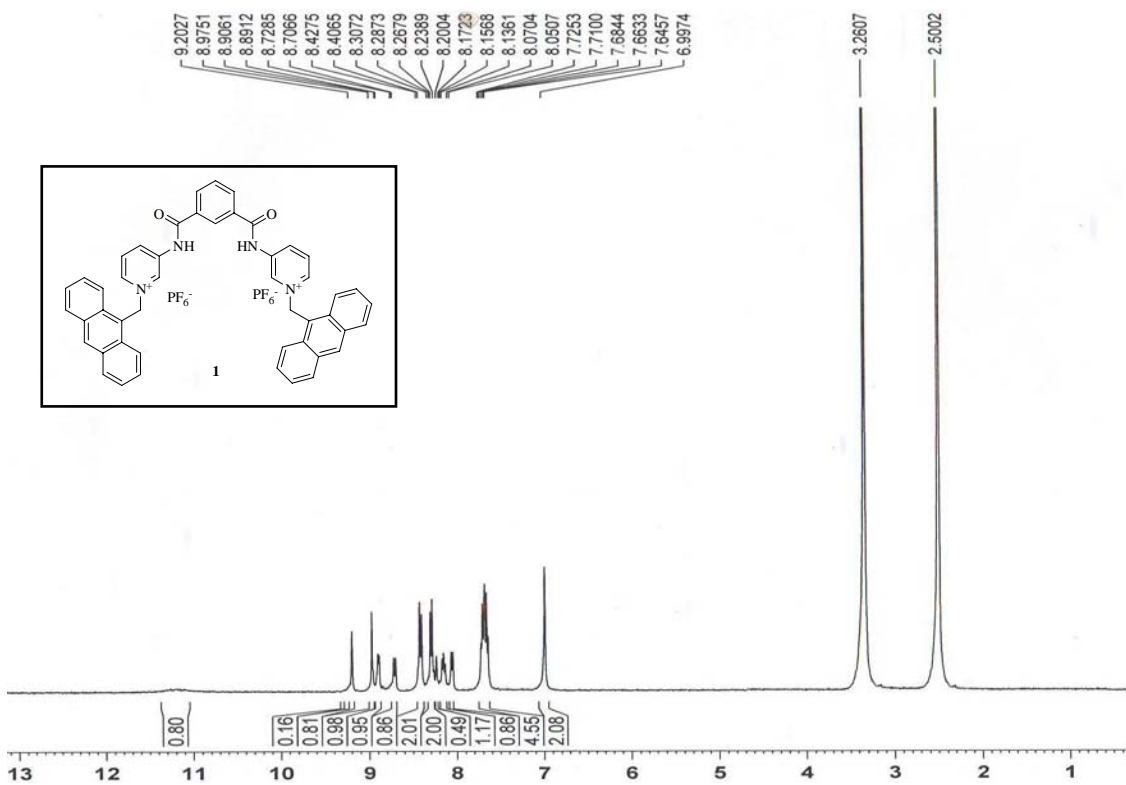

### $^{13}\text{C}$ NMR of **1** (100 MHz, $\text{d}_6$ -DMSO):

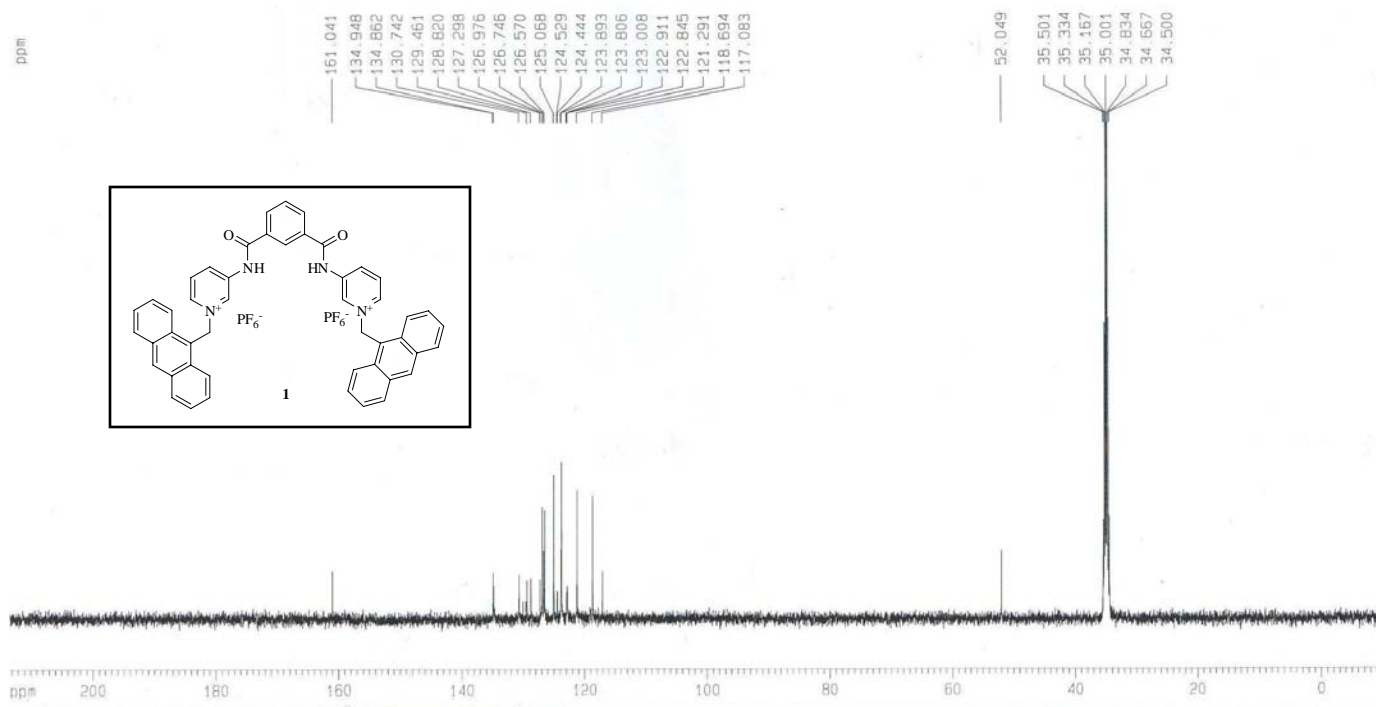

### ESI mass of **1**:

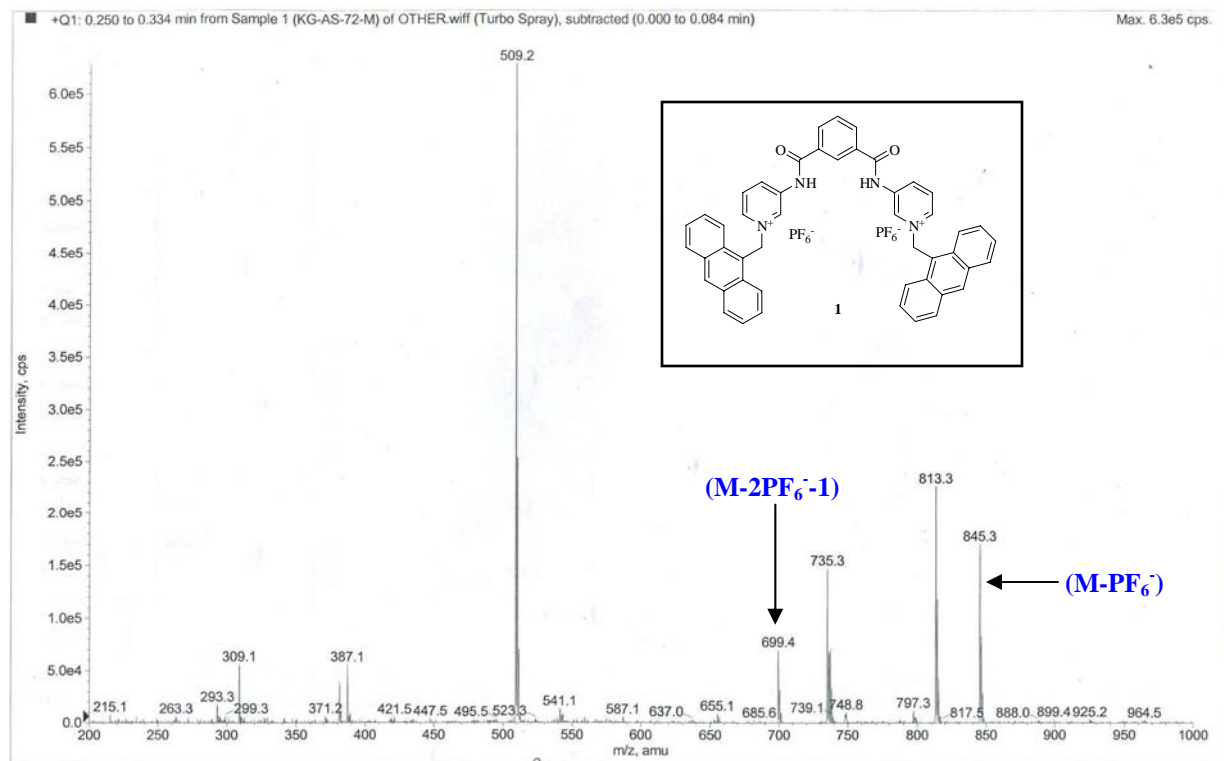

**$^1\text{H}$  NMR of 6 (400 MHz,  $\text{d}_6\text{-DMSO}$ ):**

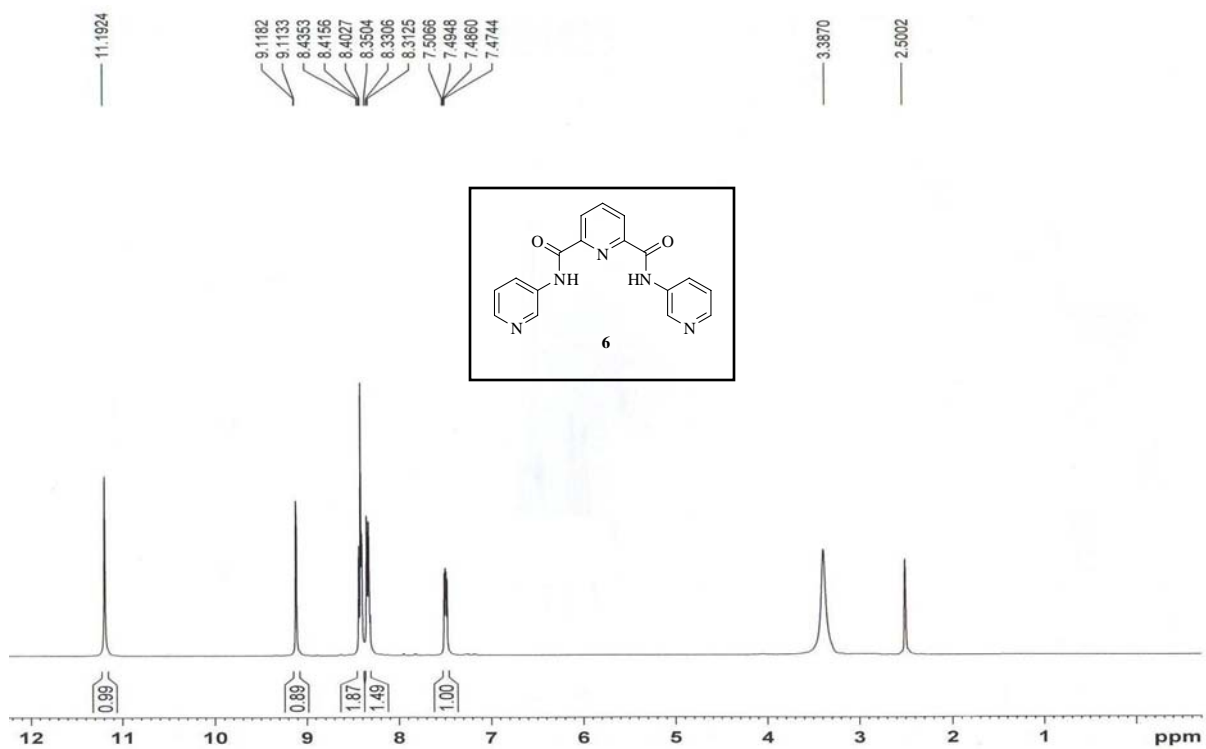

**$^{13}\text{C}$  NMR of 6 (100 MHz,  $\text{d}_6\text{-DMSO}$ ):**

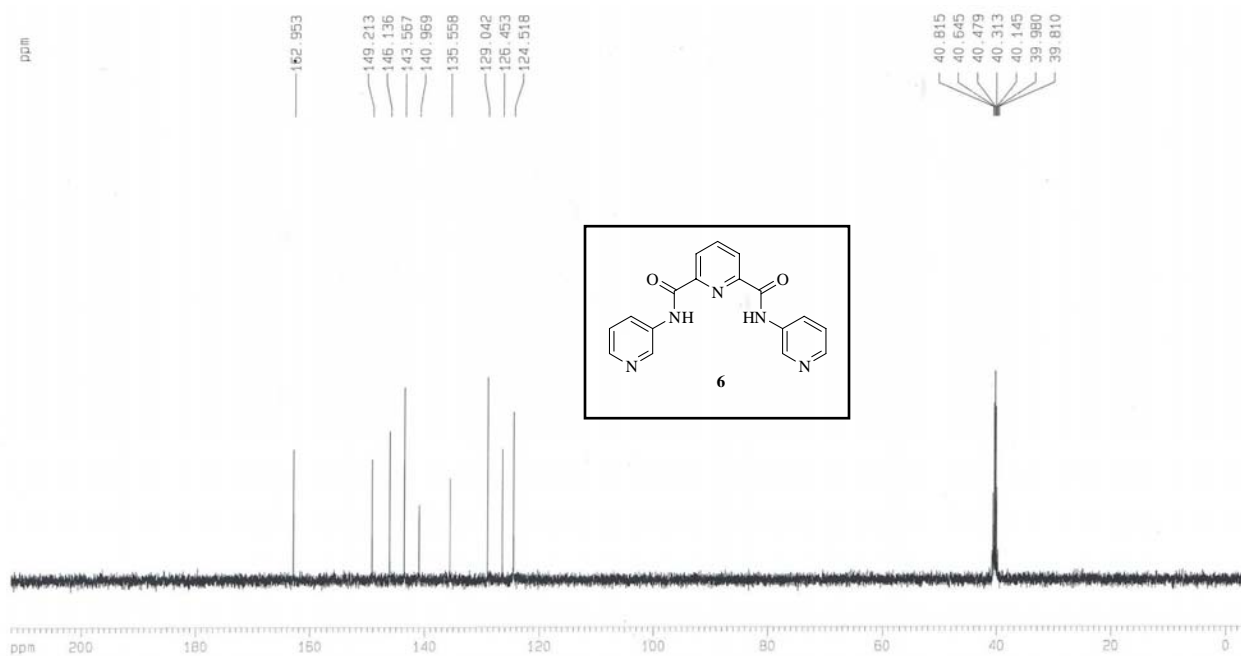

### ESI mass of 6:

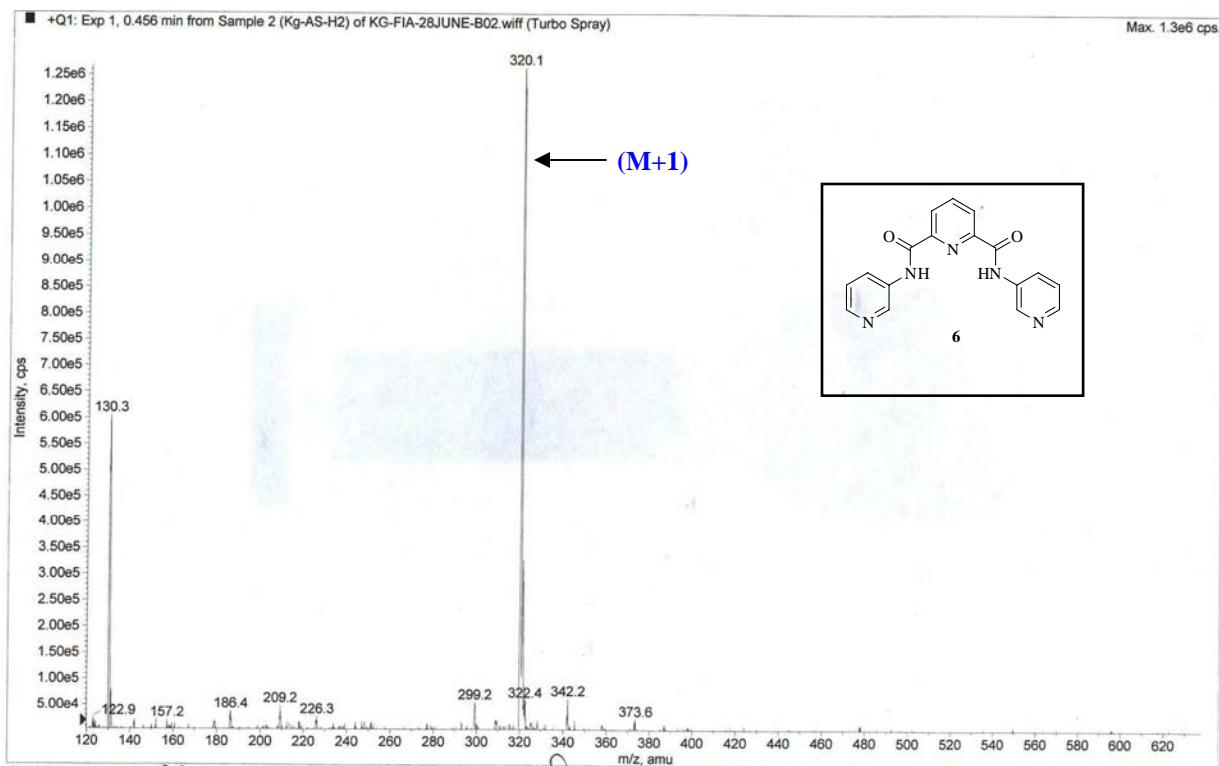

### <sup>1</sup>H NMR of 2 (400 MHz, d<sub>6</sub>-DMSO):

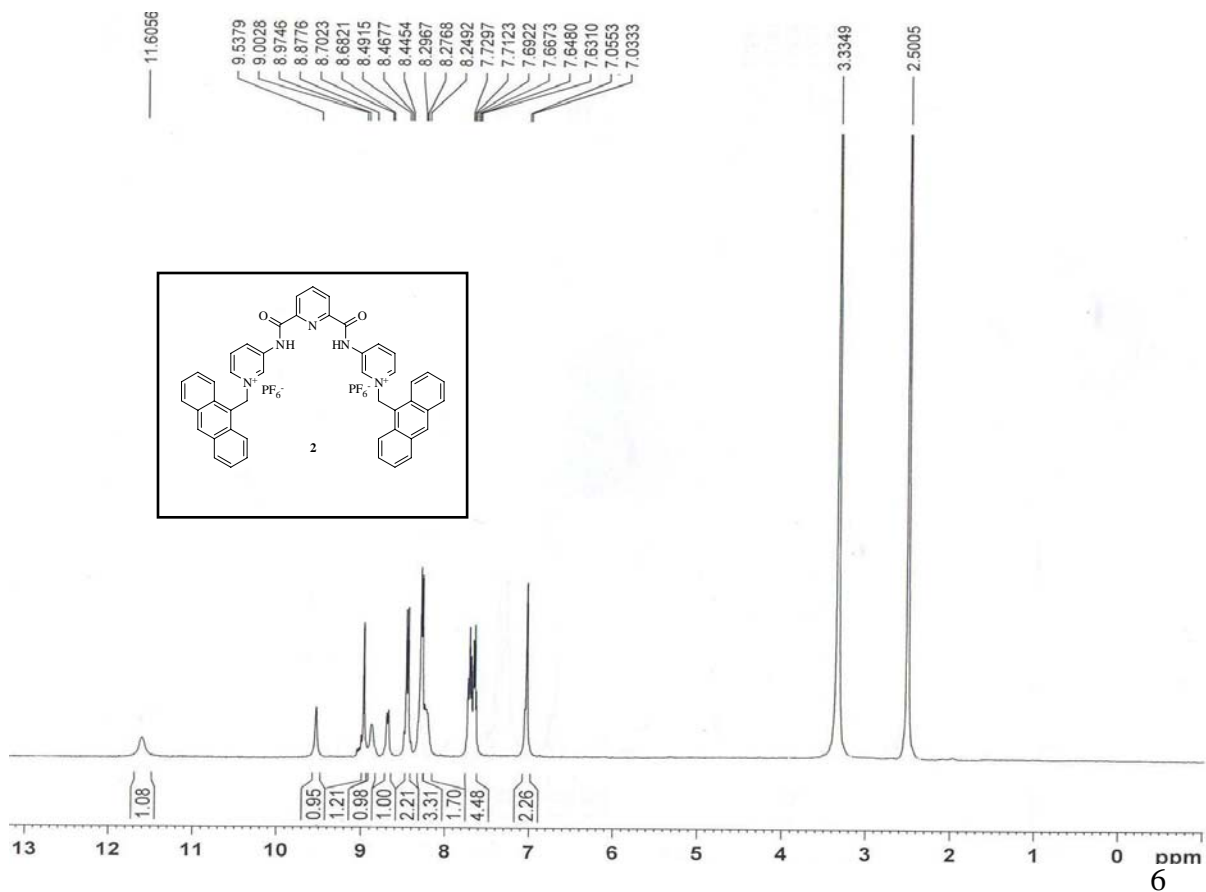

### $^{13}\text{C}$ NMR of **2** (100 MHz, $\text{d}_6$ -DMSO):

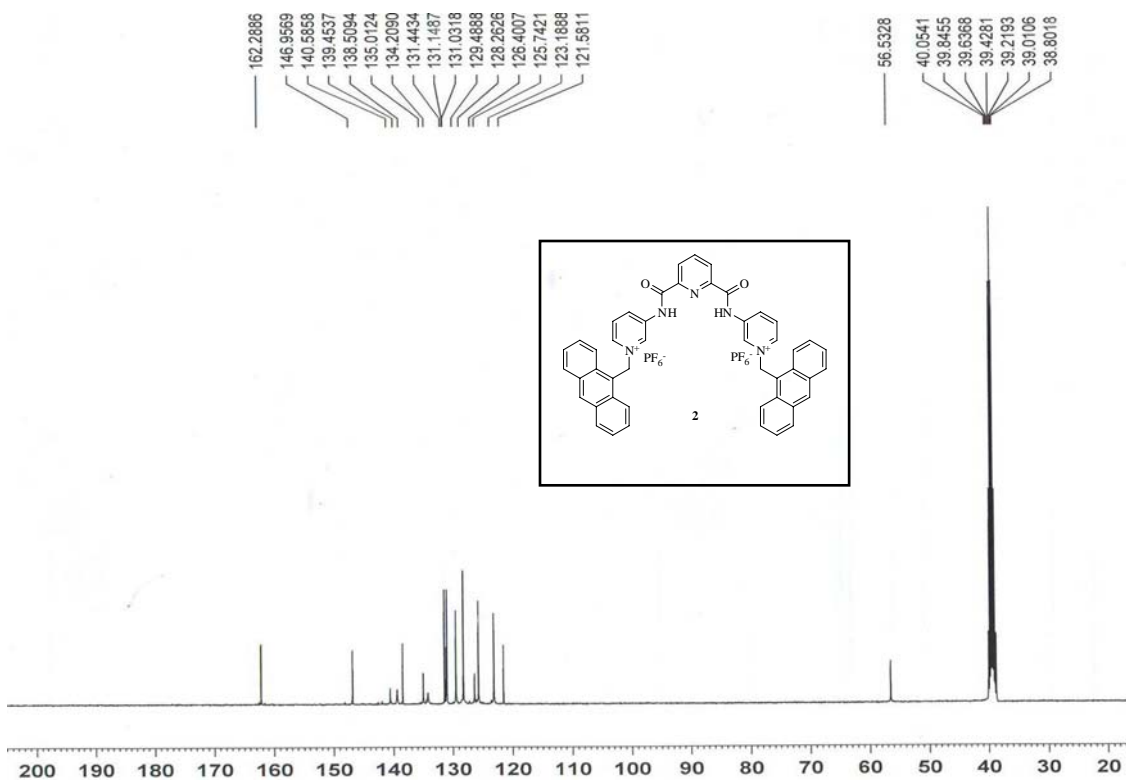

### ESI mass of **2**:

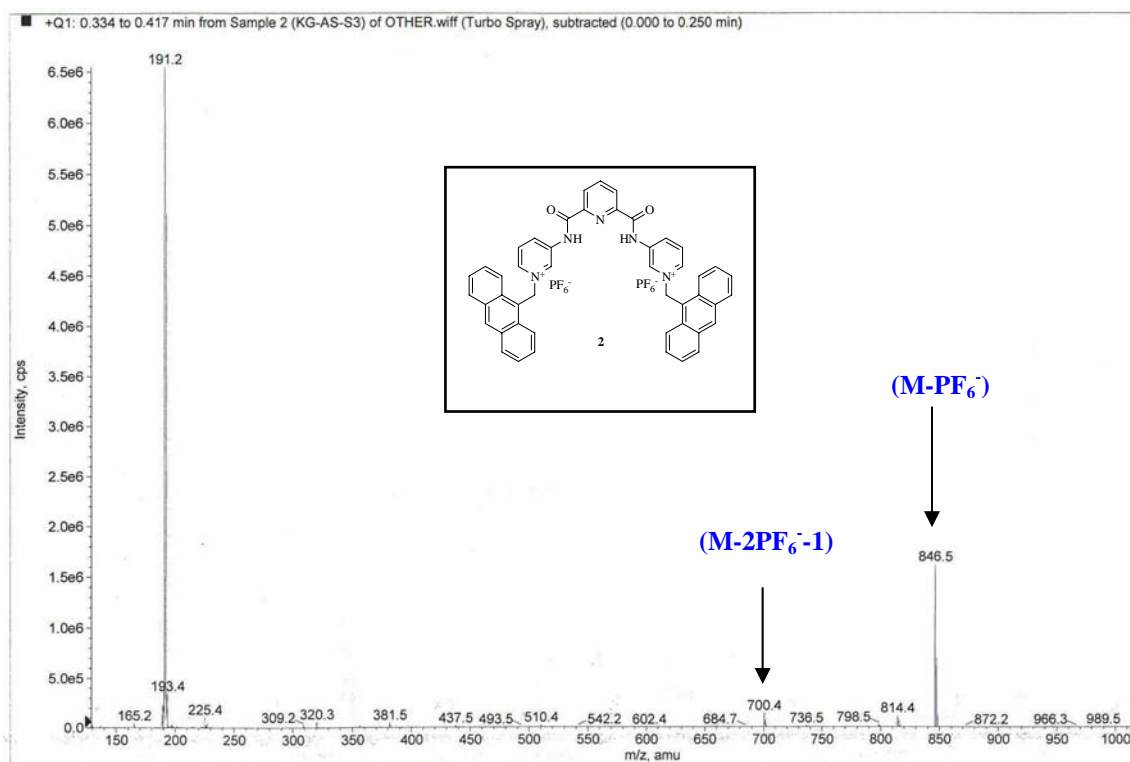

**$^1\text{H}$  NMR of 7 (400 MHz,  $\text{d}_6\text{-DMSO}$ ):**

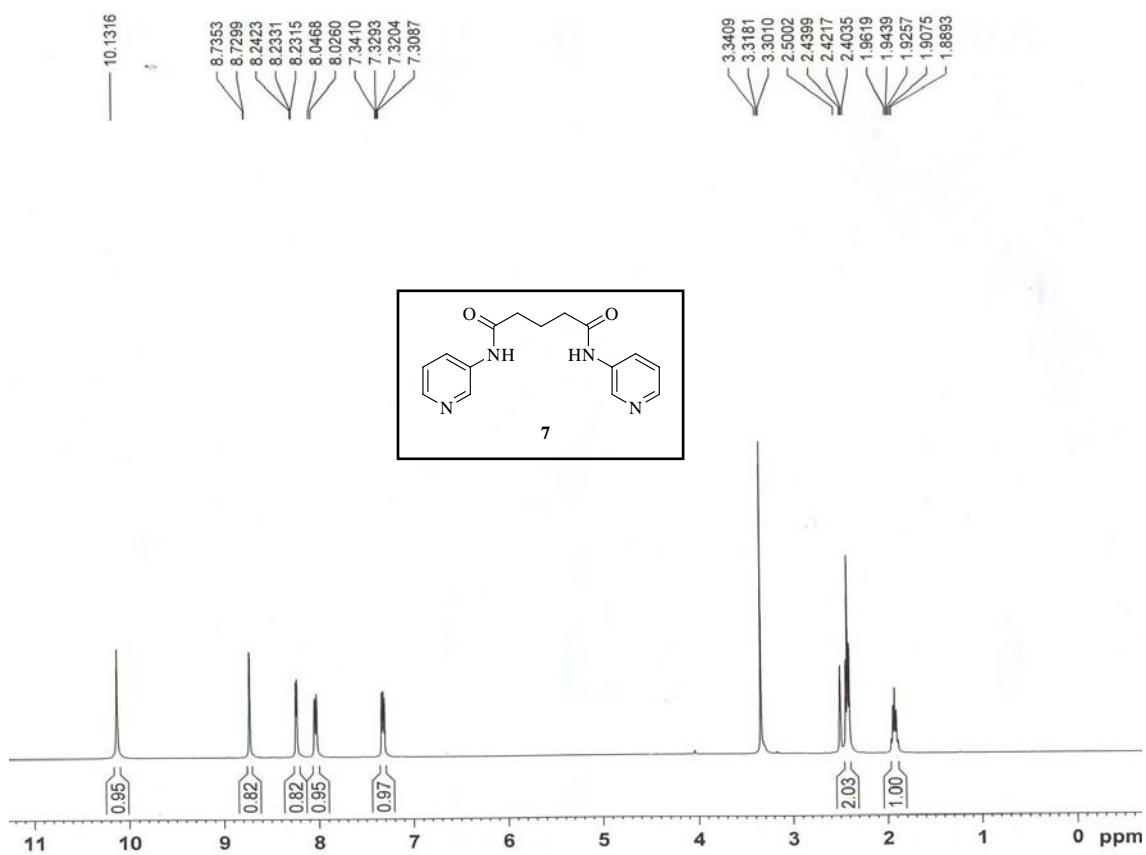

**$^{13}\text{C}$  NMR of 7 (100 MHz,  $\text{d}_6\text{-DMSO}$ ):**

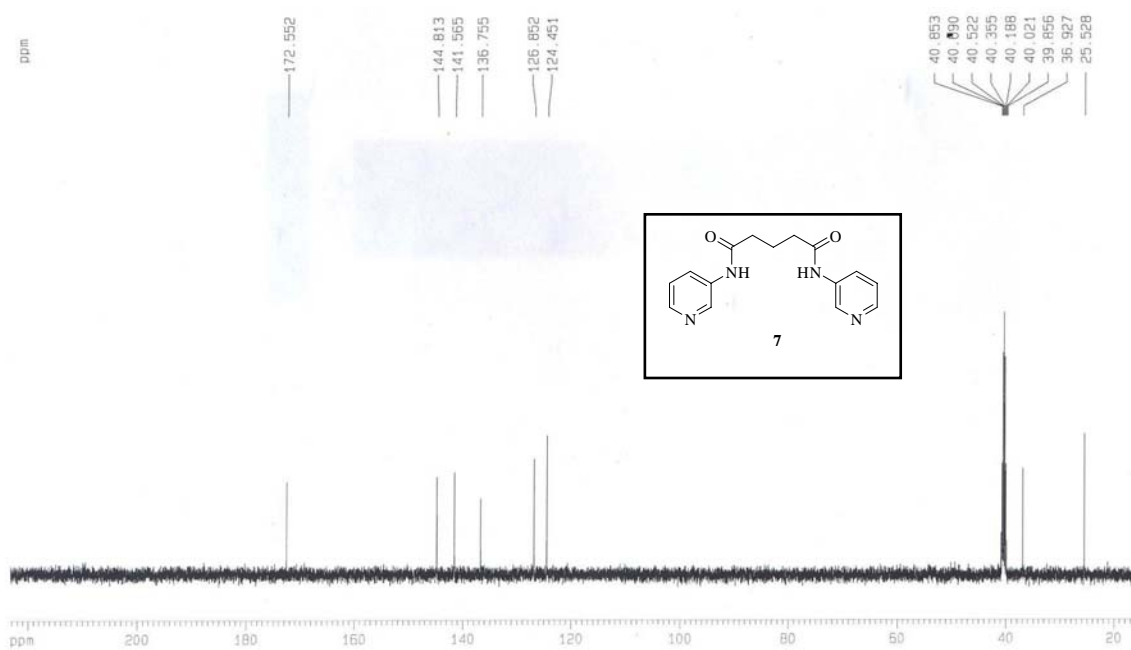



### ESI mass of 7:

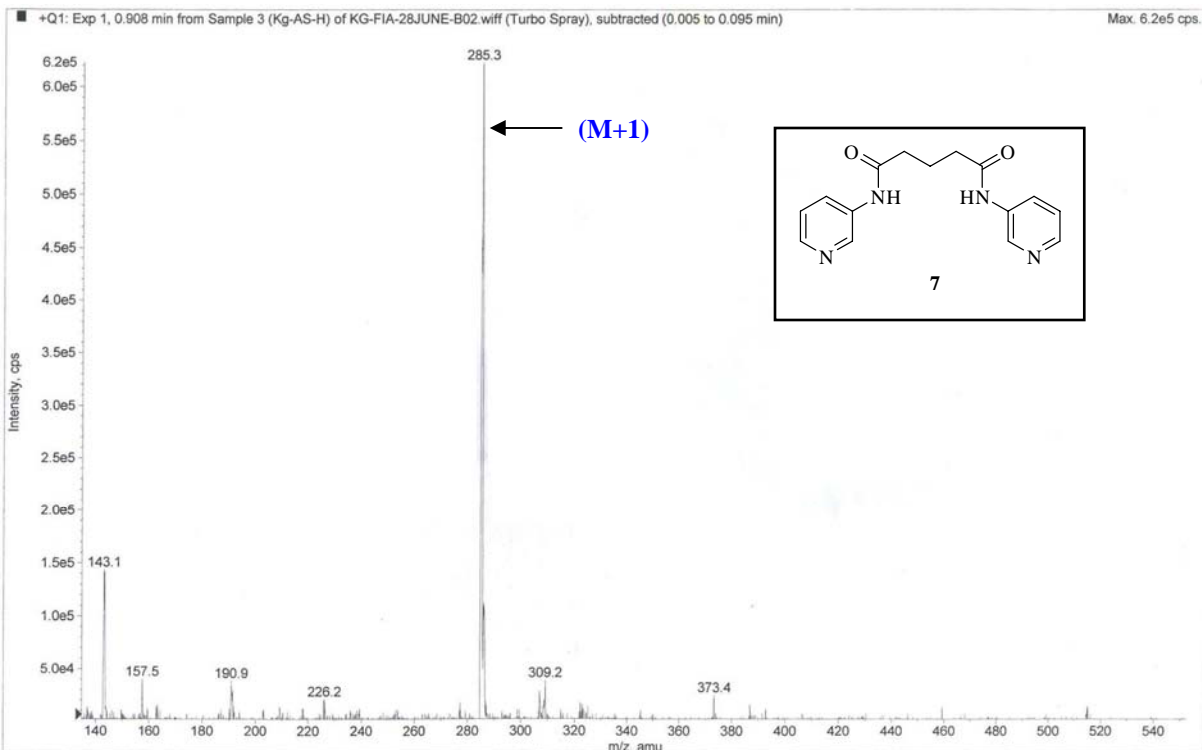

### <sup>1</sup>H NMR of 3 (400 MHz, d<sub>6</sub>-DMSO):

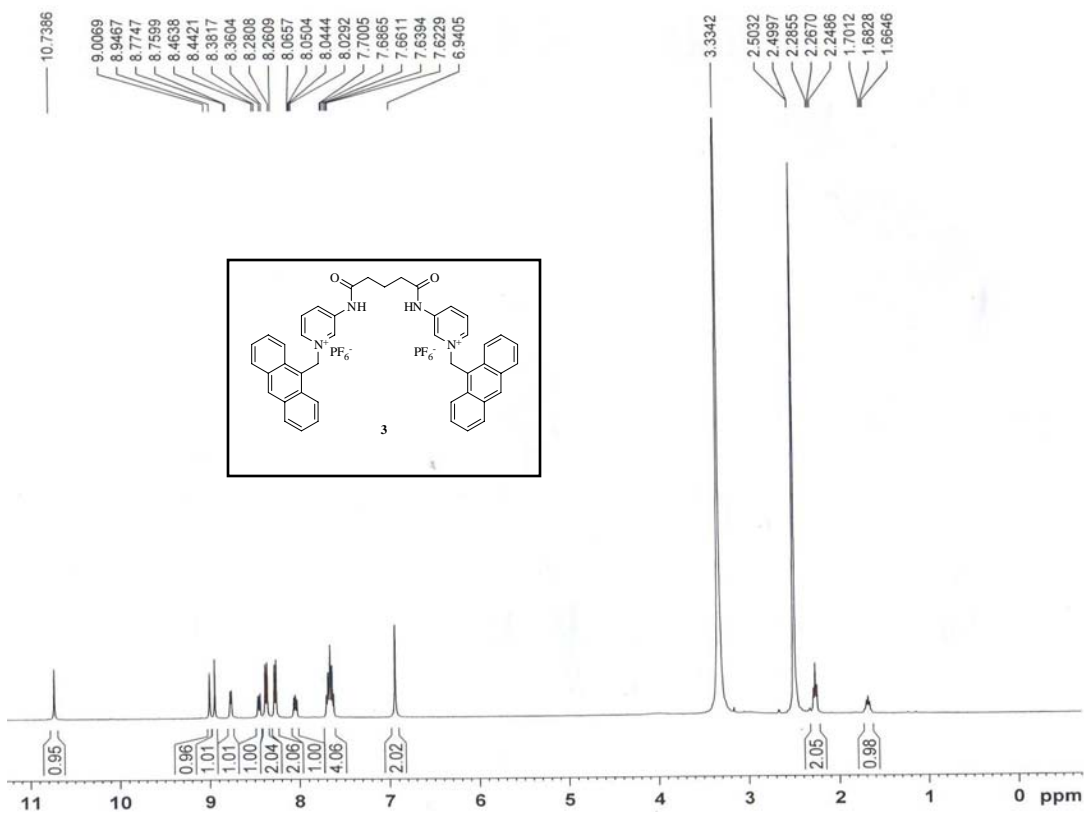

### $^{13}\text{C}$ NMR of 3 (100 MHz, $\text{d}_6$ -DMSO):

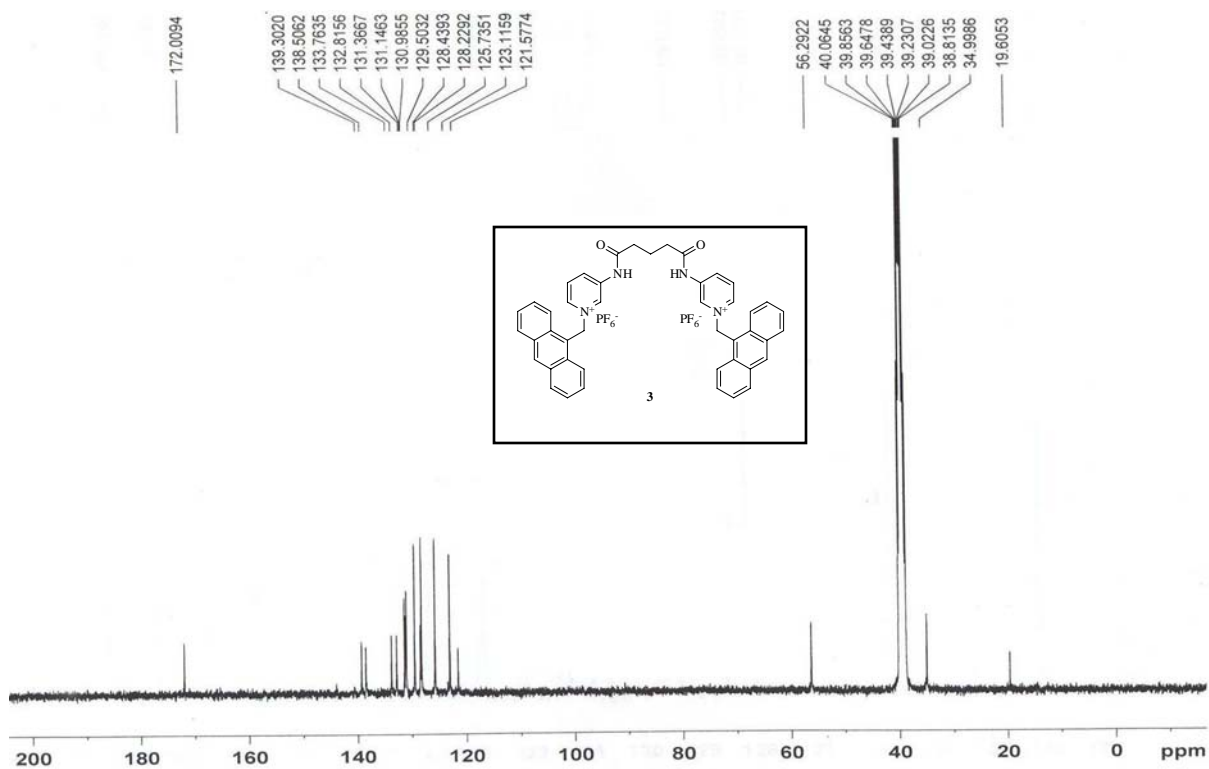

### ESI mass of 3:

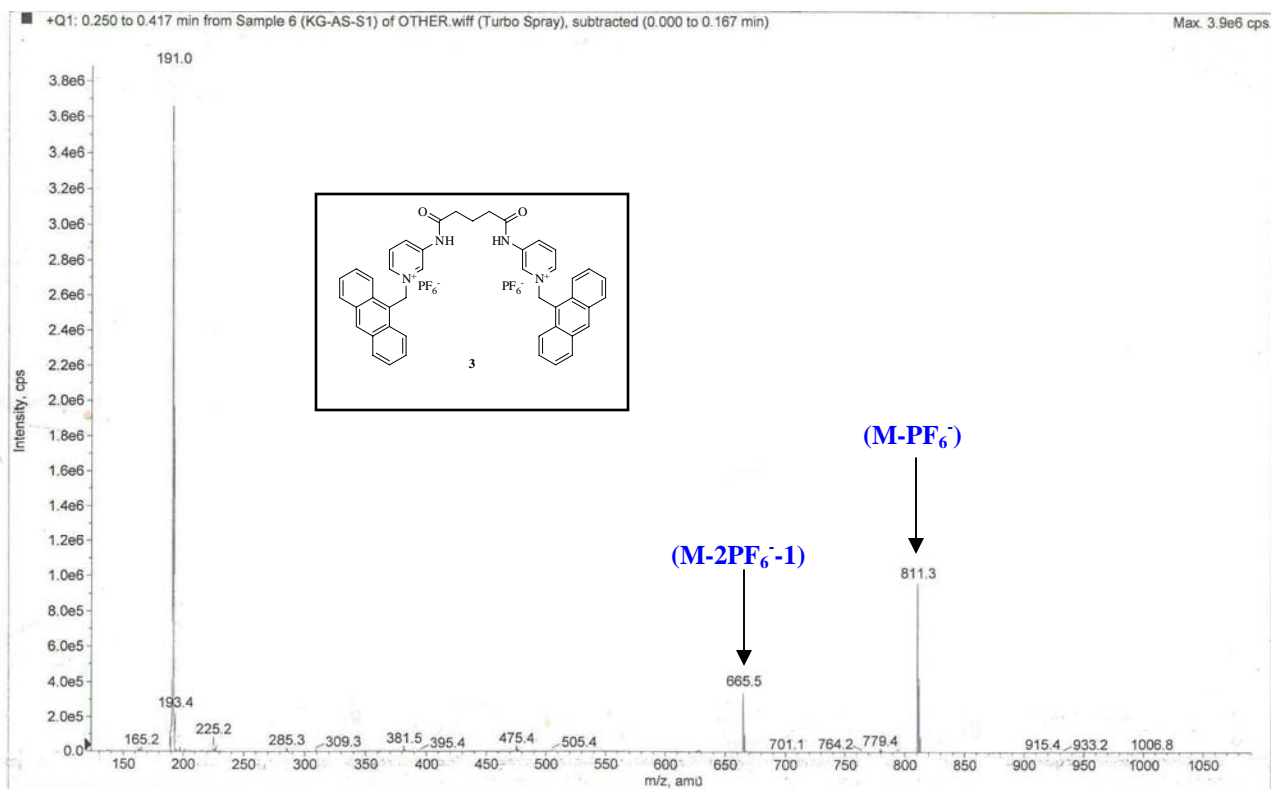

**$^1\text{H}$  NMR of 8 (400 MHz,  $\text{d}_6\text{-DMSO}$ ):**

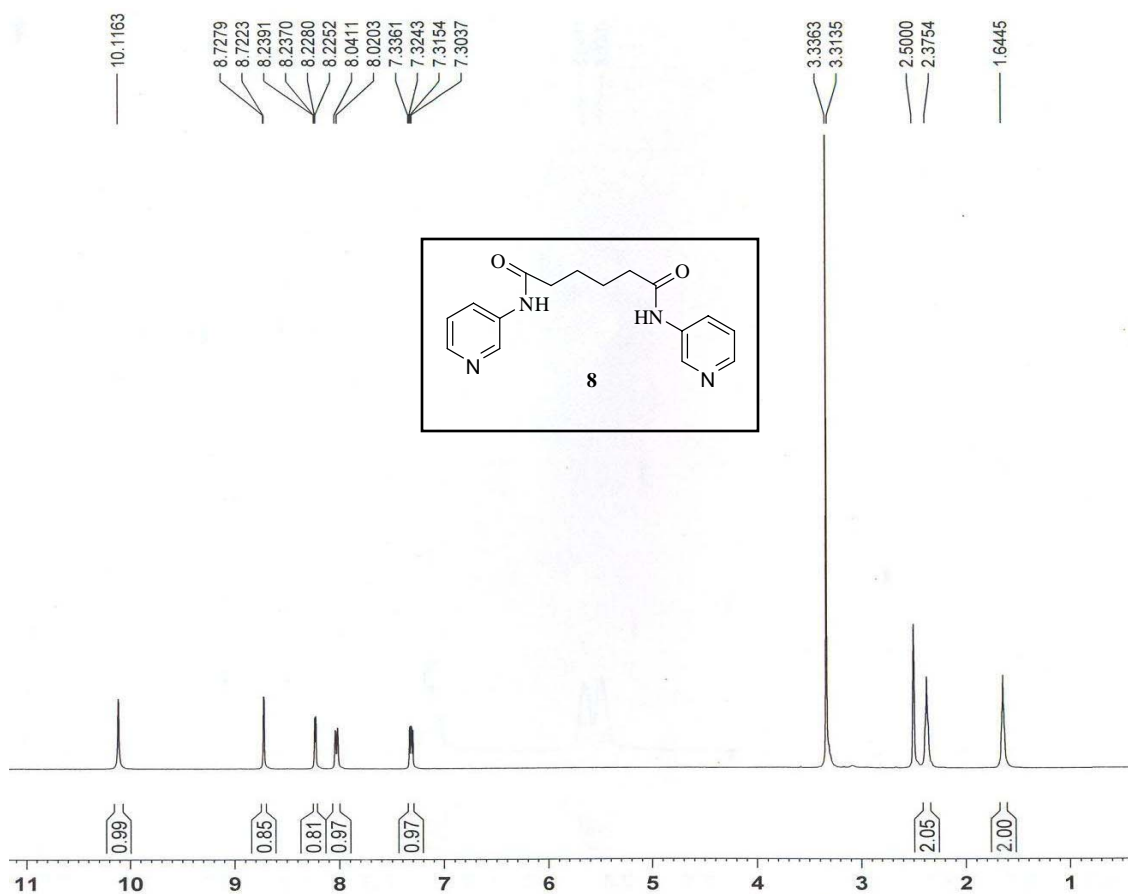

**$^{13}\text{C}$  NMR of 8 (100 MHz,  $\text{d}_6\text{-DMSO}$ ):**

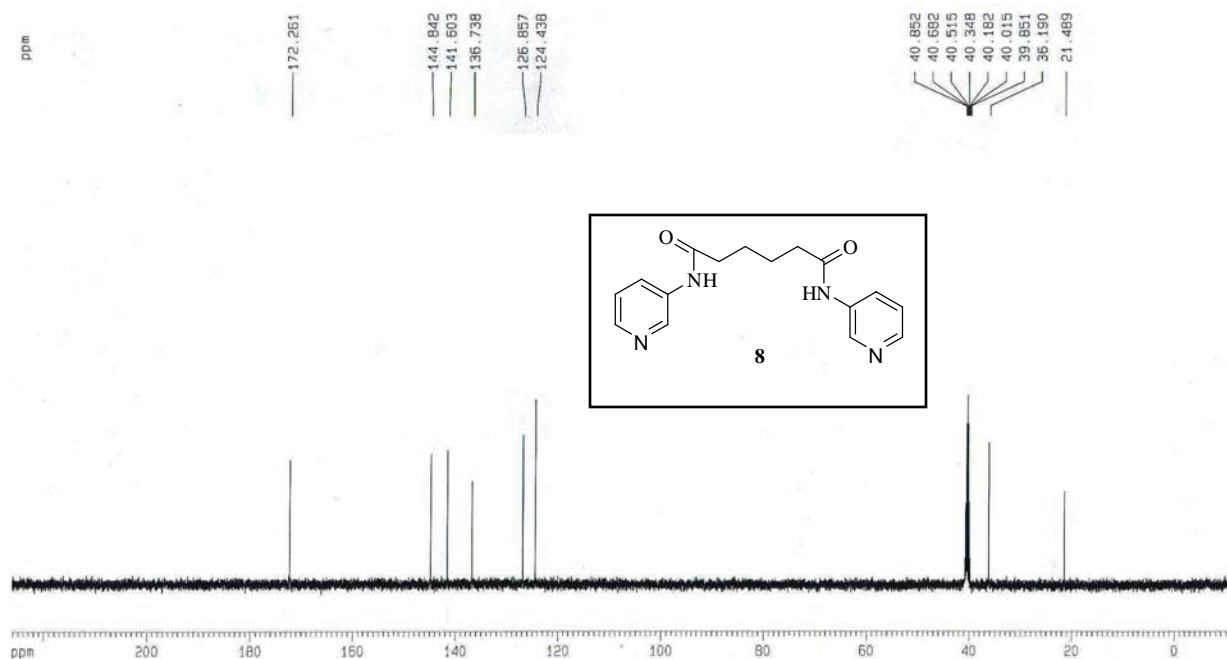

### ESI mass of 8:

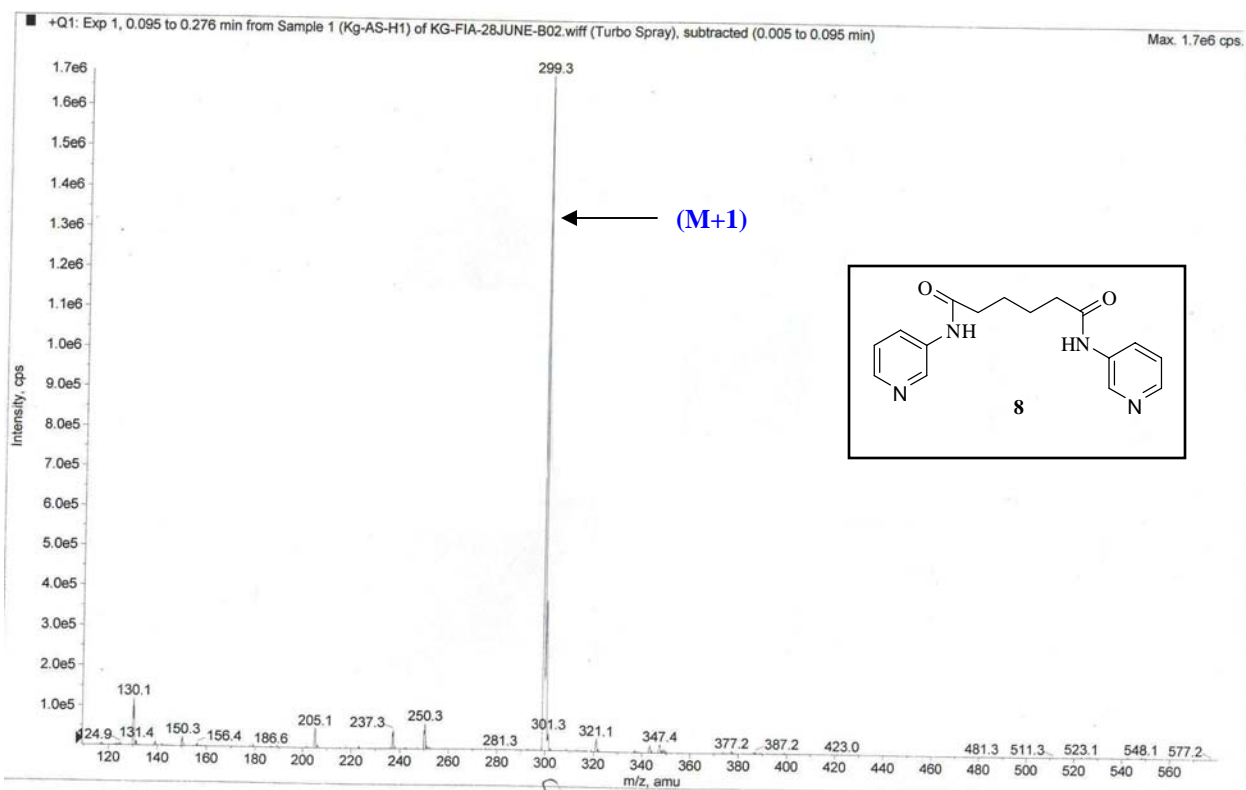

### <sup>1</sup>H NMR of 4 (400 MHz, d<sub>6</sub>-DMSO):

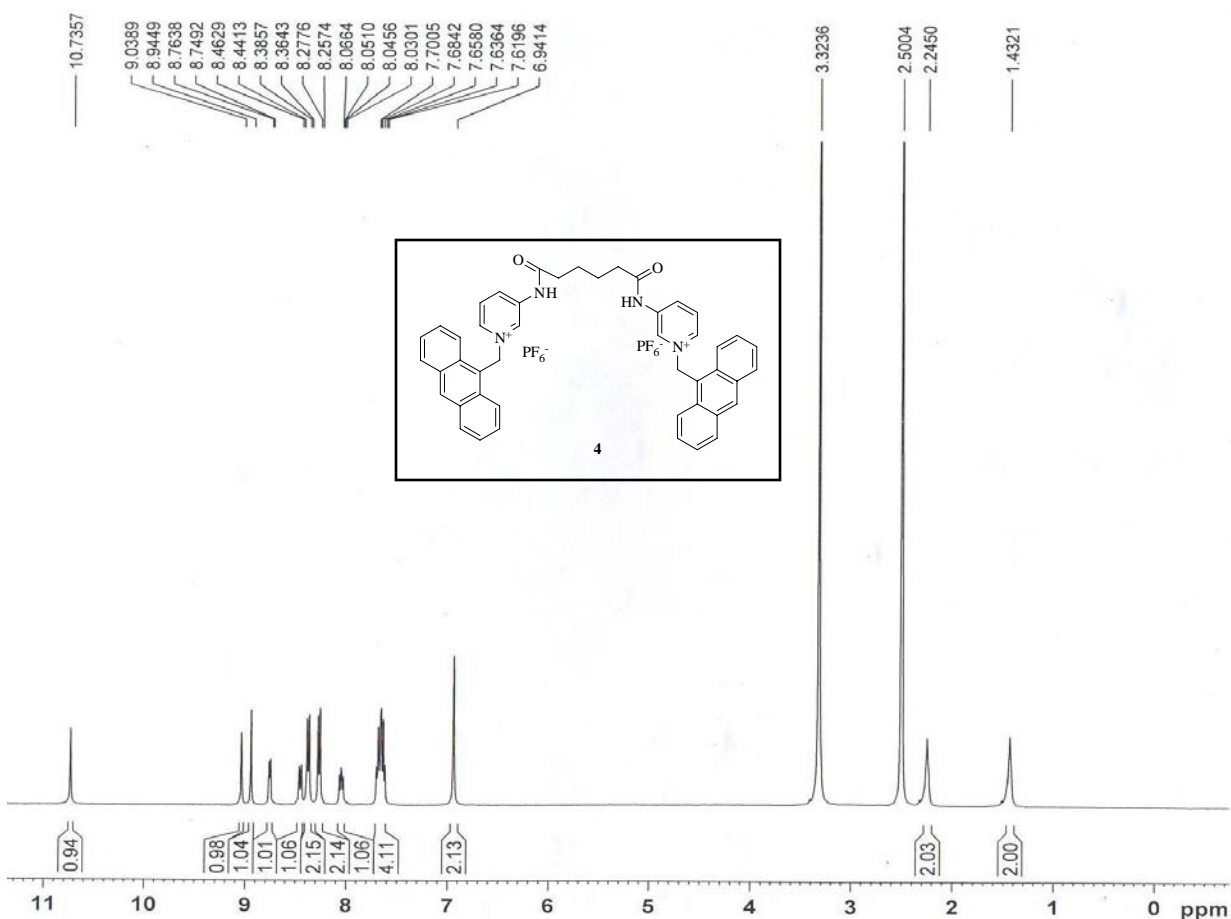

### $^{13}\text{C}$ NMR of **4** (100 MHz, $\text{d}_6$ -DMSO):

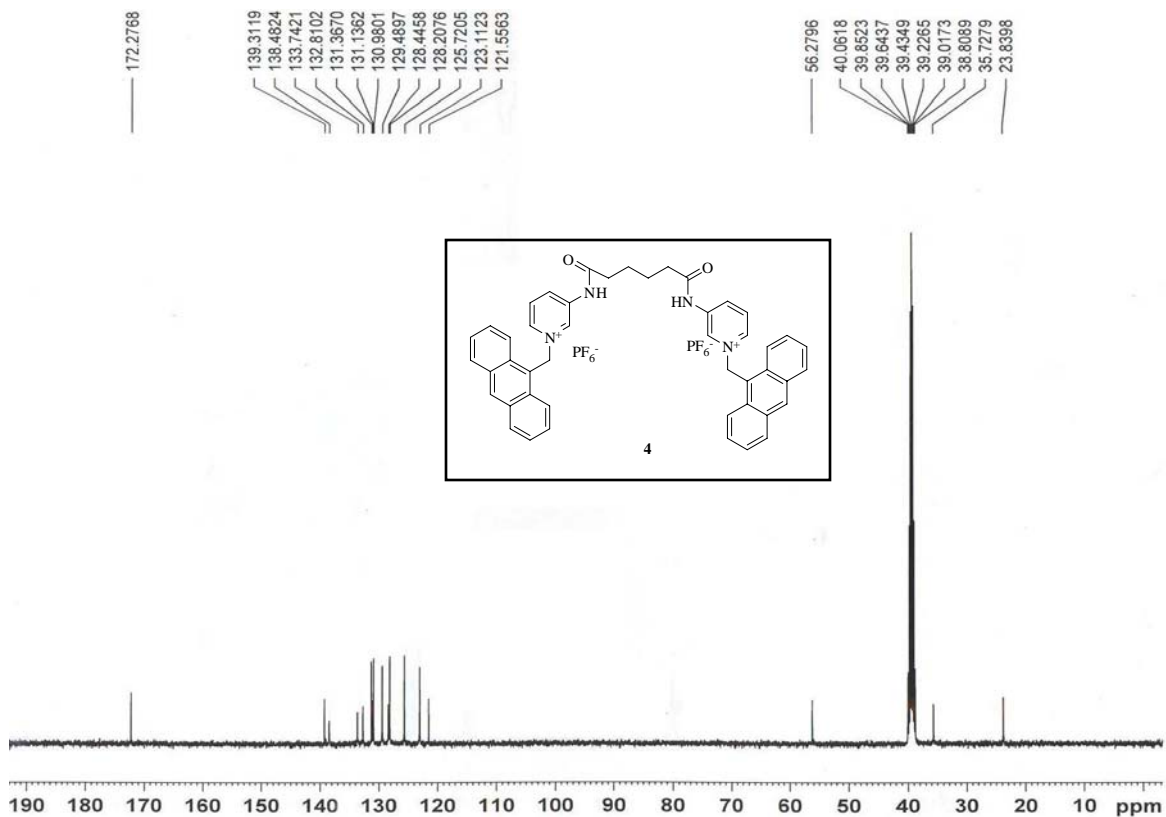

### ESI mass of **4**:

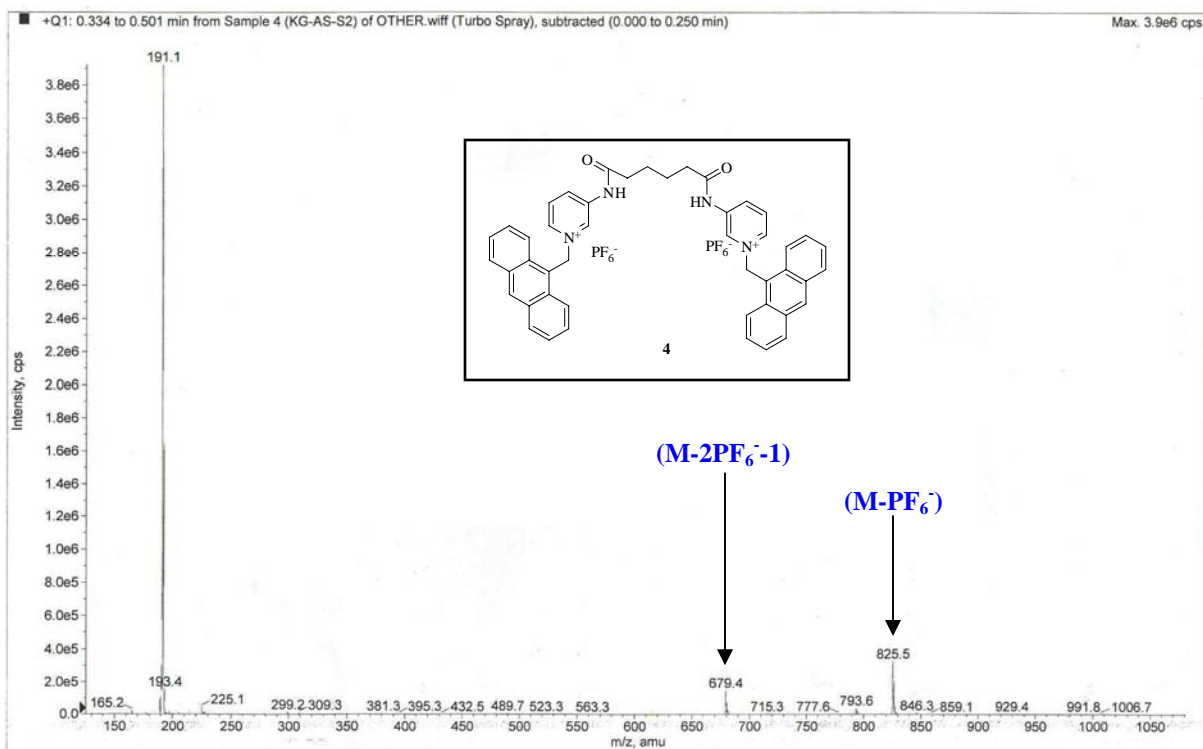

**2a. Selected emission titration curves for receptor 1 in CH<sub>3</sub>CN with following anions.**

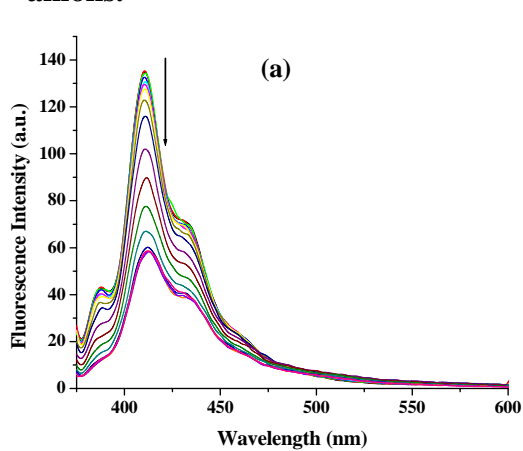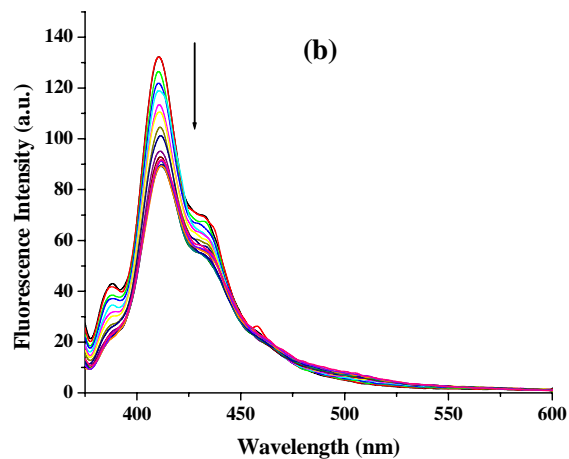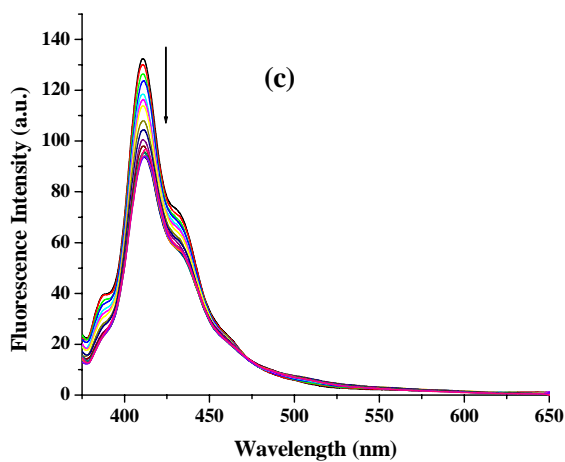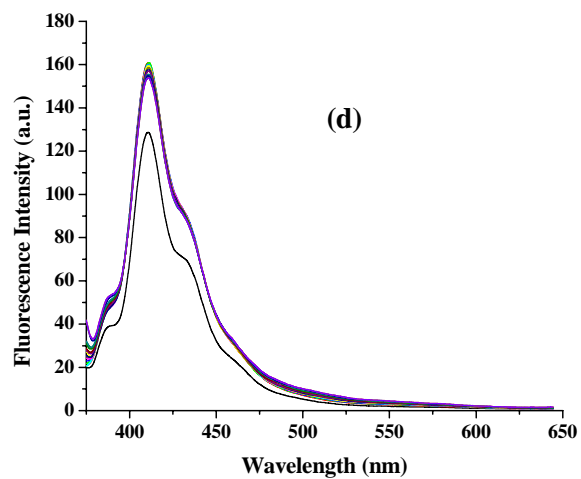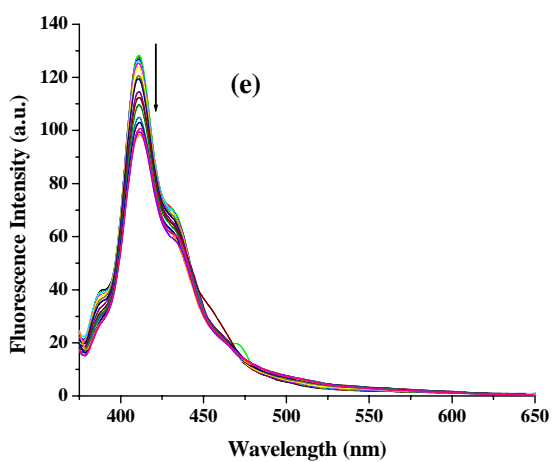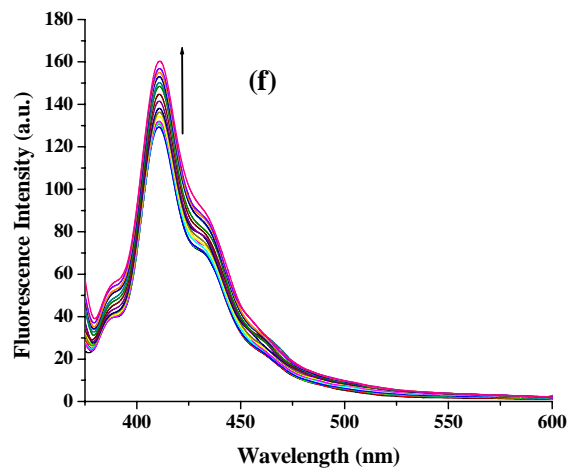

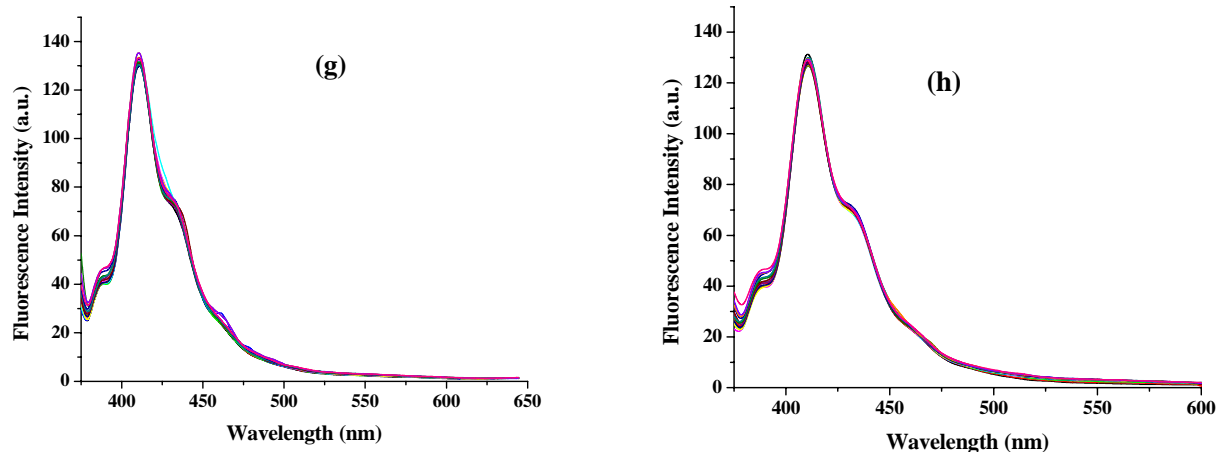

**FigureS1a:** Fluorescence titration curve of receptor **1** ( $c = 5.65 \times 10^{-5}$  M) with the tetrabutylammonium (a) fluoride, (b) acetate, (c) propanoate, (d) hydrogensulphate, (e) salt of ibuprofen, (f) benzoate, (g) chloride, (h) bromide in  $\text{CH}_3\text{CN}$  (concentration of all guests  $c = 2.5 \times 10^{-4}$  M,  $\lambda_{\text{Excitation}} = 370$  nm).

## 2b. Selected UV-vis titration curves for receptor 1 in $\text{CH}_3\text{CN}$ :

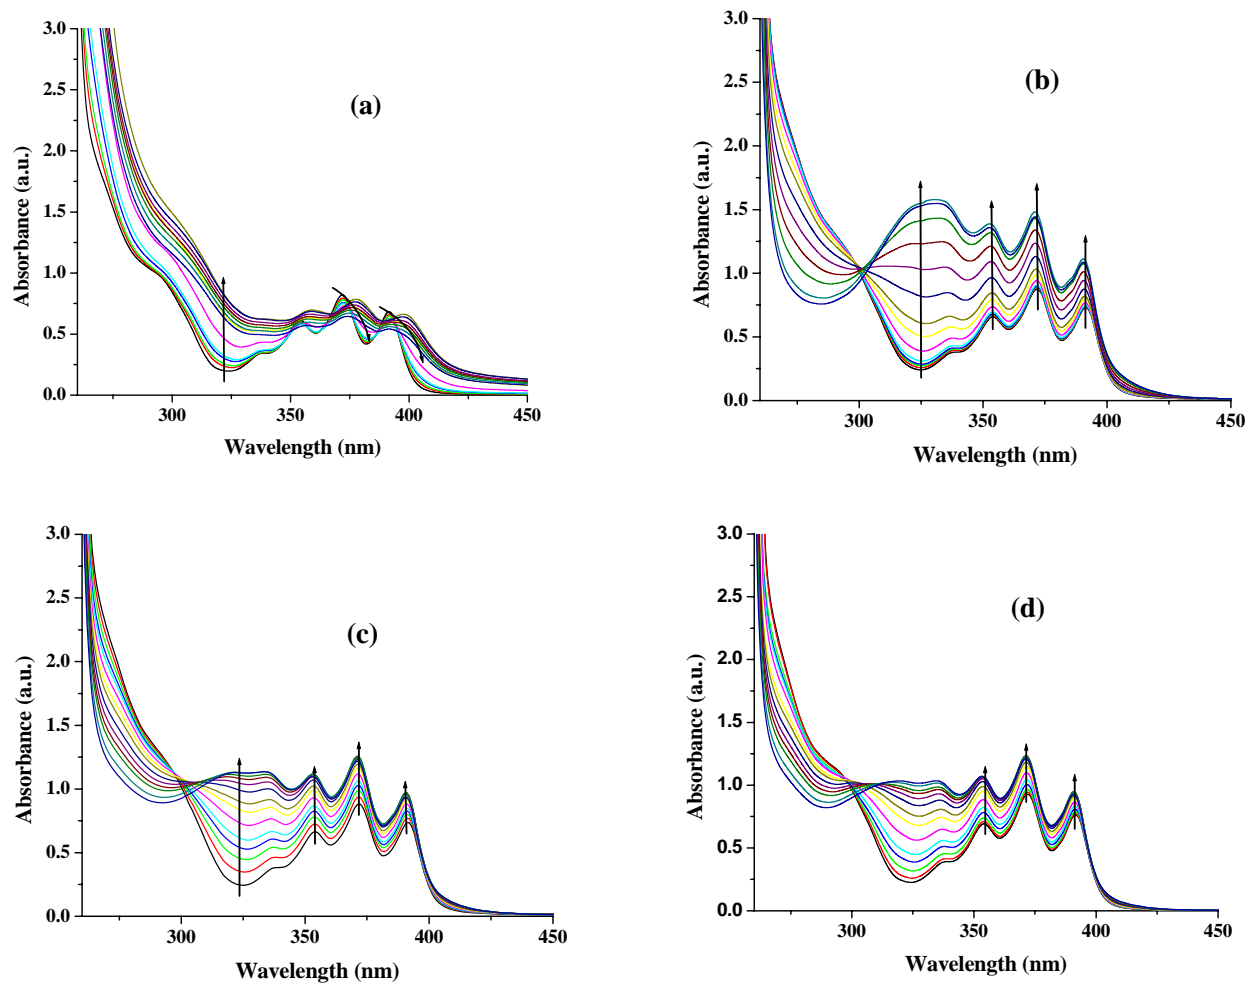

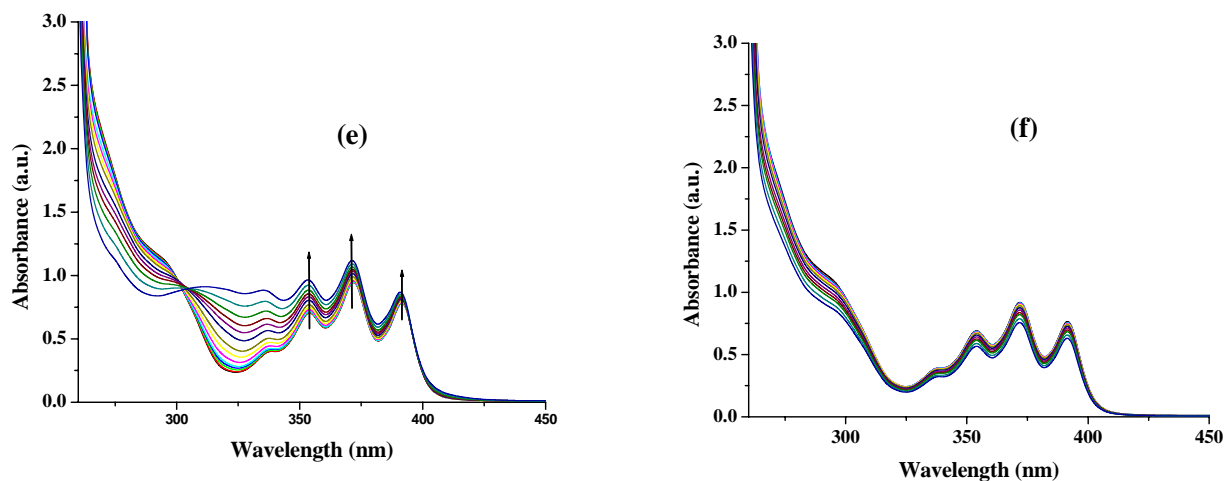

**Figure S1b:** UV-vis titration curve of receptor **1** ( $c = 5.65 \times 10^{-5}$  M) with the tetrabutylammonium (a)  $\text{H}_2\text{PO}_4^-$ , (b) fluoride, (c) acetate, (d) propanoate, (e) salt of ibuprofen, (f) hydrogensulphate in  $\text{CH}_3\text{CN}$  (concentration of all guests  $c = 2.5 \times 10^{-3}$  M  $\lambda_{\text{max}} = 371$  nm).

### 2c. Selected emission titration curves for receptor 2 in $\text{CH}_3\text{CN}$ with following anions

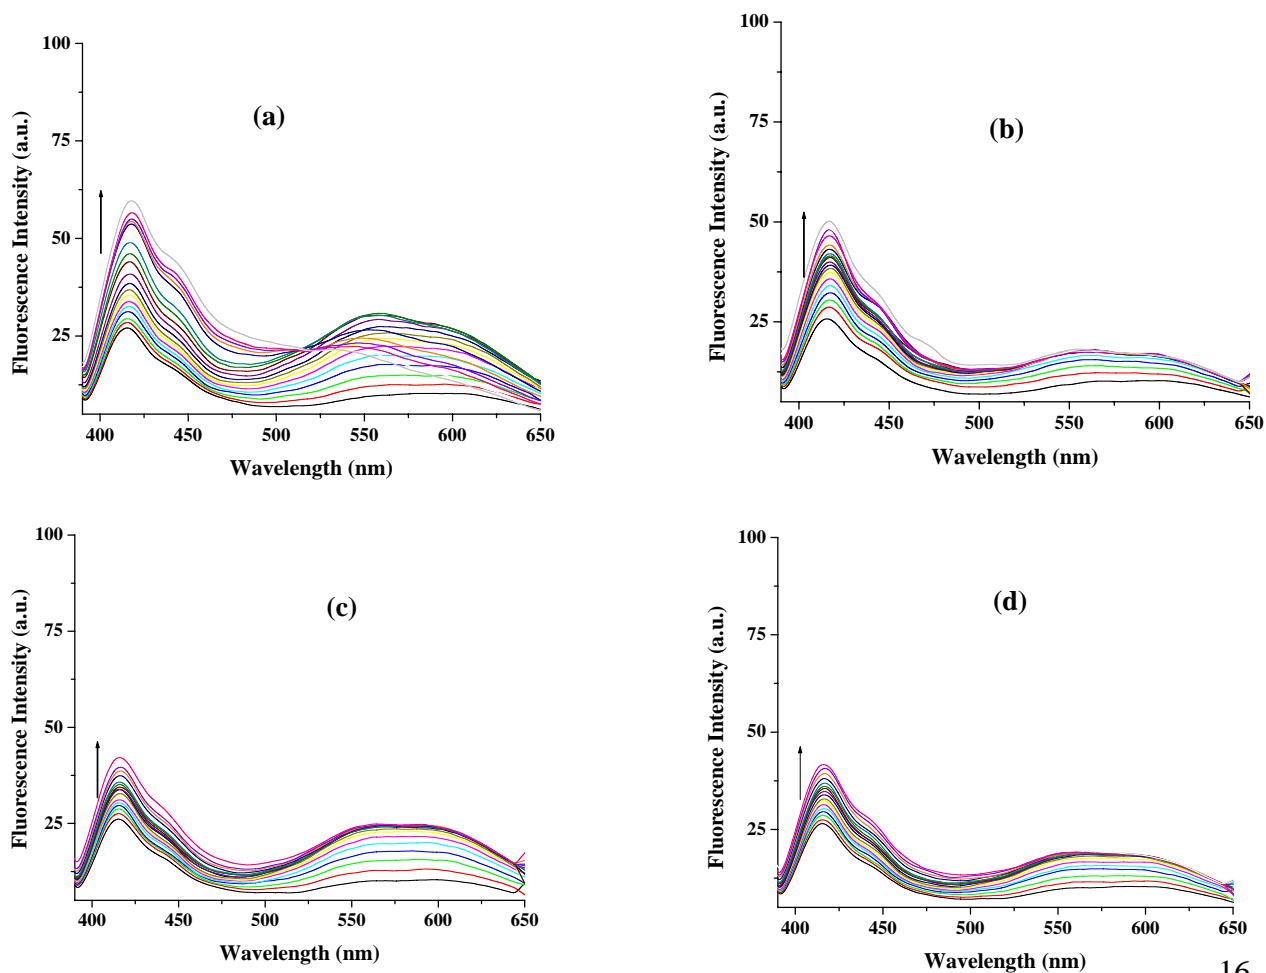



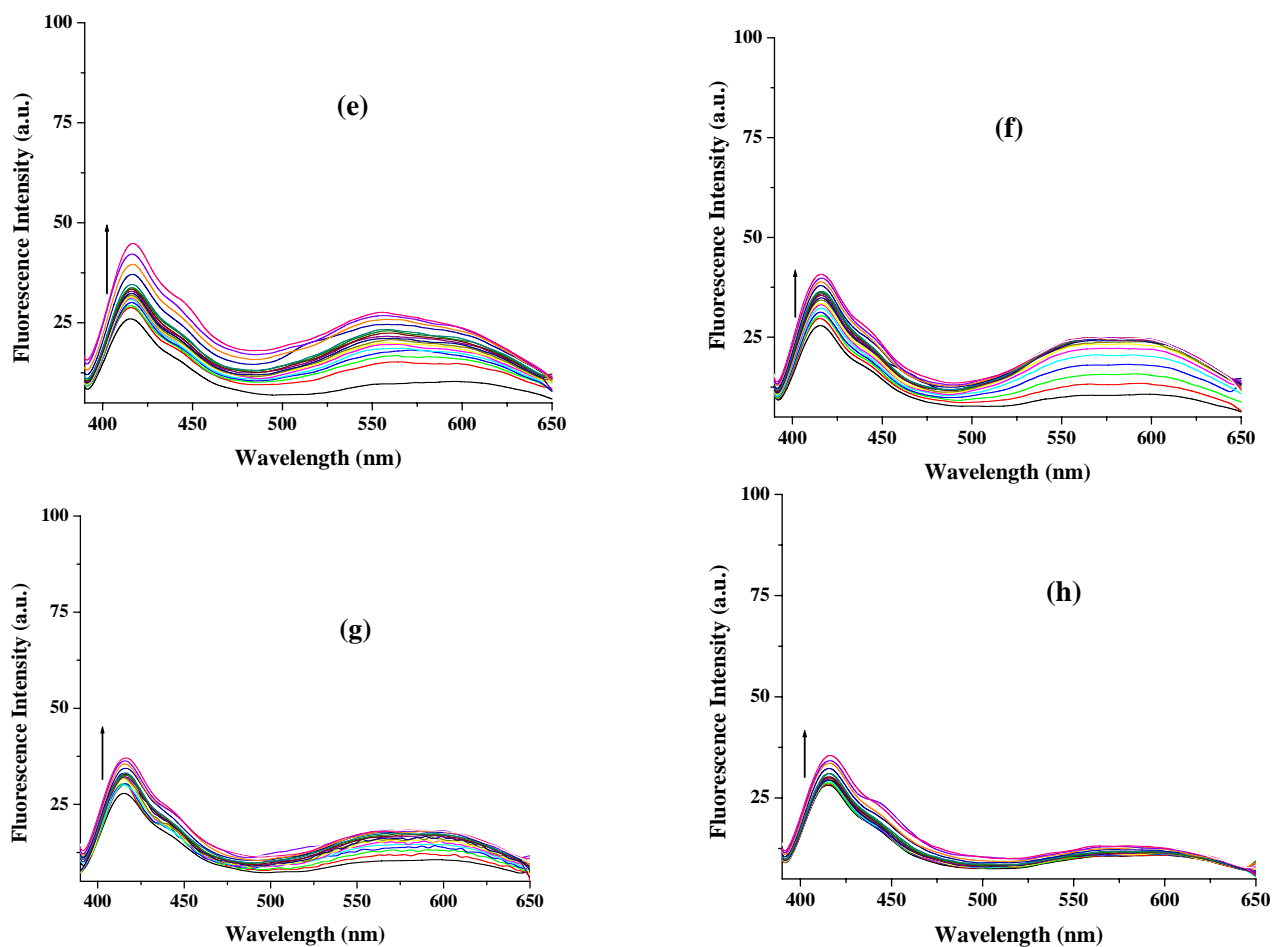

**Figure S1c:** Fluorescence titration curve of receptor **2** ( $c = 5.65 \times 10^{-5}$  M) with the tetrabutylammonium (a) fluoride, (b) acetate, (c) propanoate, (d) hydrogensulphate, (e) salt of ibuprofen, (f) benzoate, (g) chloride, (h) bromide in CH<sub>3</sub>CN (concentration of all guests  $c = 2.5 \times 10^{-3}$  M,  $\lambda_{\text{Excitation}} = 370$  nm).

## 2d. Selected UV-vis titration curves for receptor 2 in CH<sub>3</sub>CN:

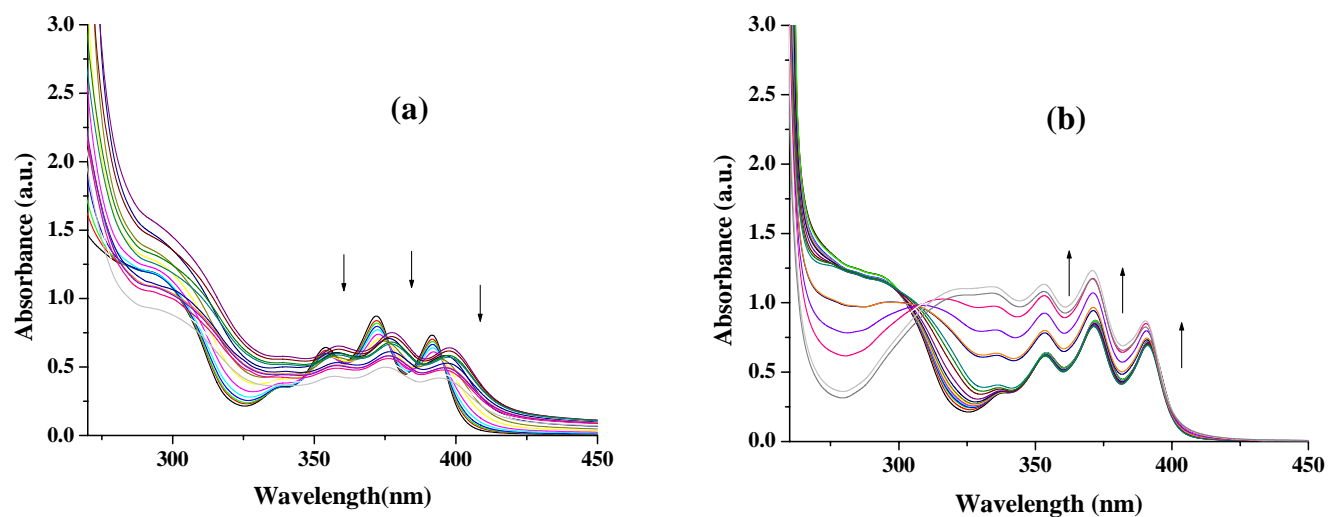

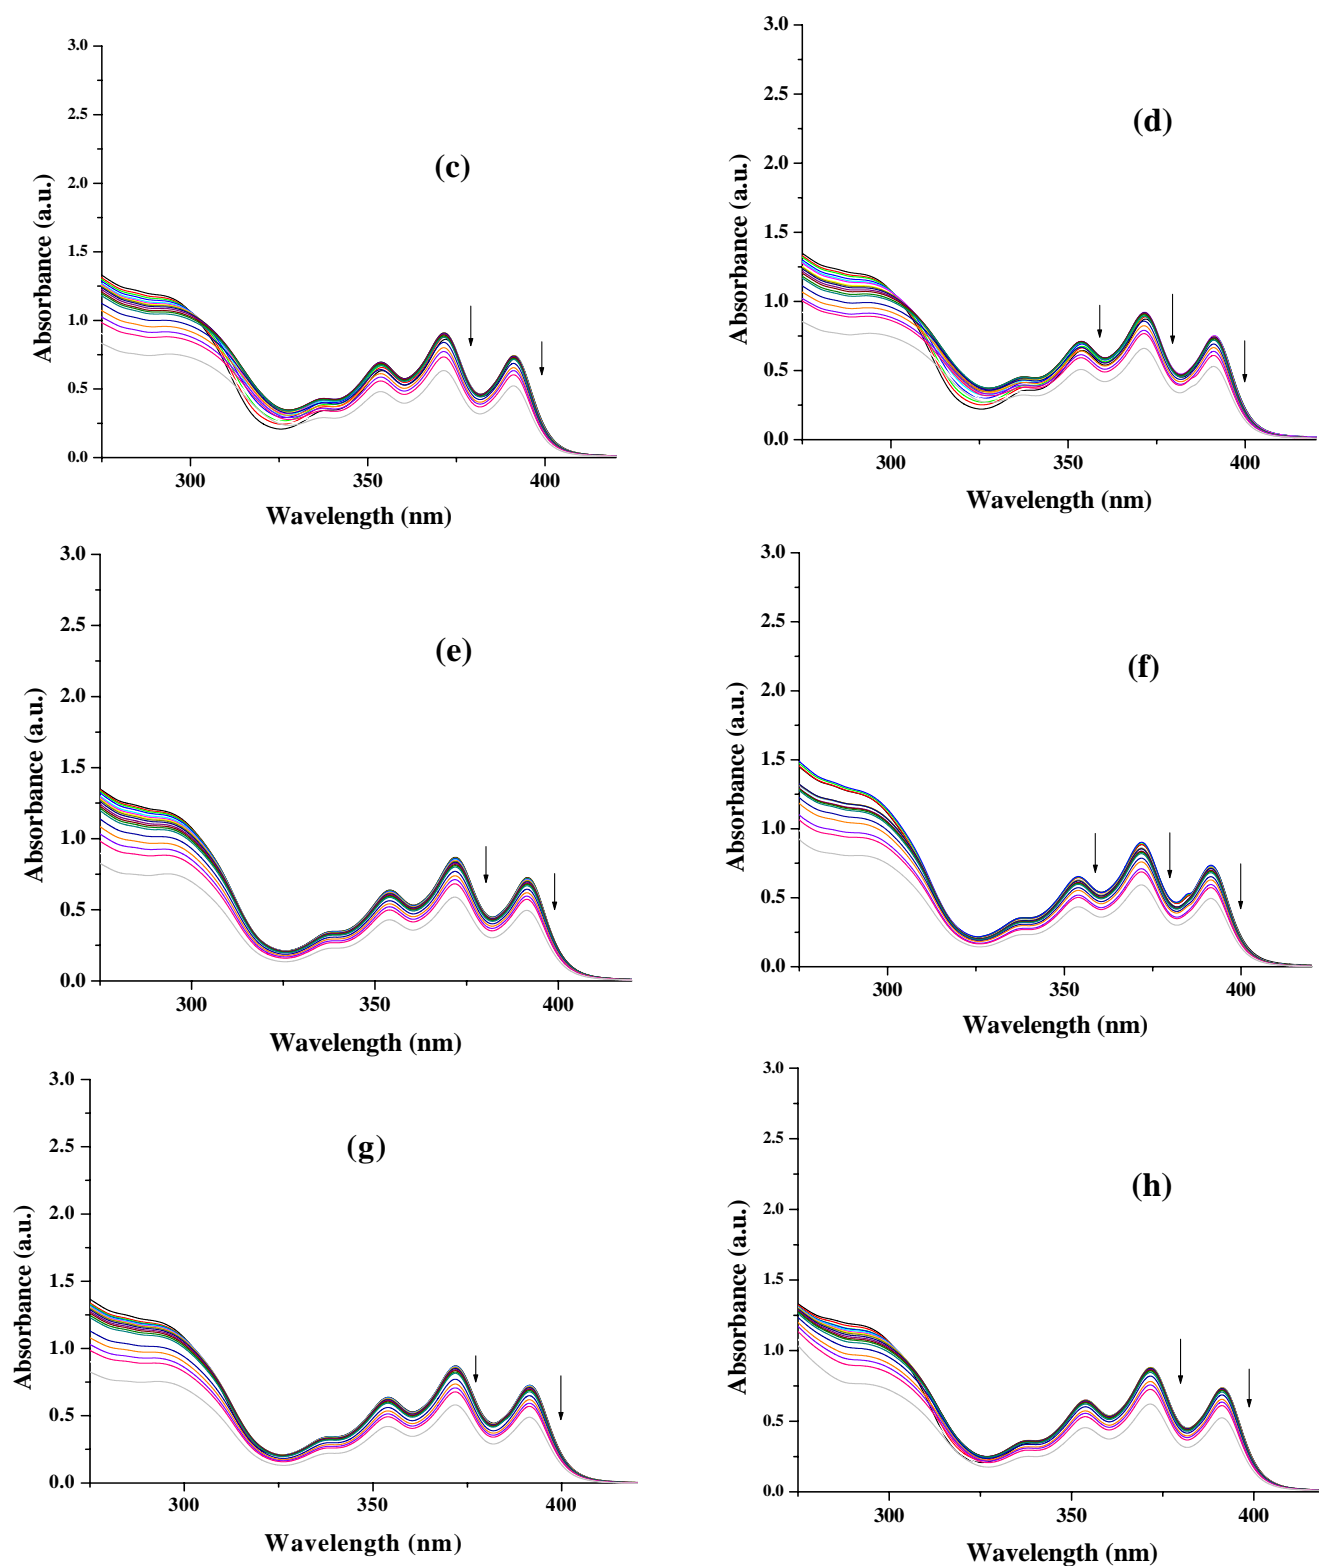

**Figure S1d.** UV-vis titration curve of receptor **2** (c = 5.65 × 10<sup>-5</sup> M) with the tetrabutylammonium (a) H<sub>2</sub>PO<sub>4</sub><sup>-</sup>, (b) fluoride, (c) acetate, (d) propanoate, (e) salt of ibuprofen, (f) hydrogensulphate (g) chloride, (h) benzoate in CH<sub>3</sub>CN (concentration of all guests c = 2.5 × 10<sup>-4</sup> M, λ<sub>max</sub> = 371 nm).

## 2e. Selected emission titration curves for receptor 3 in CH<sub>3</sub>CN with following anions

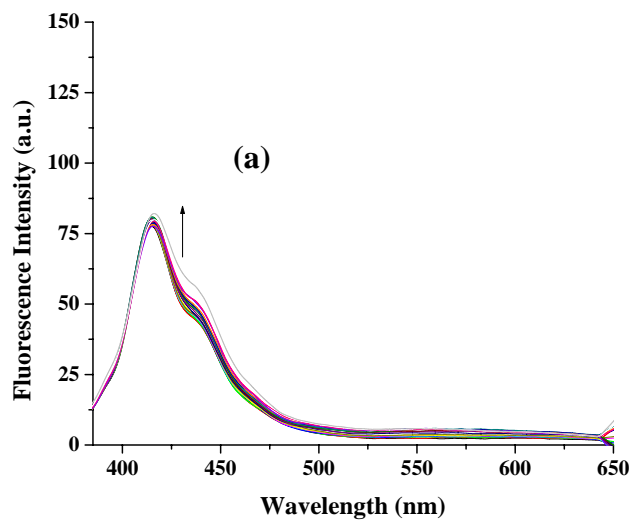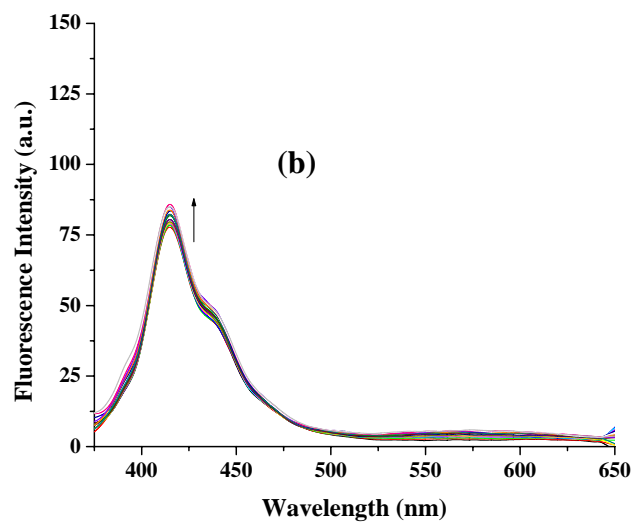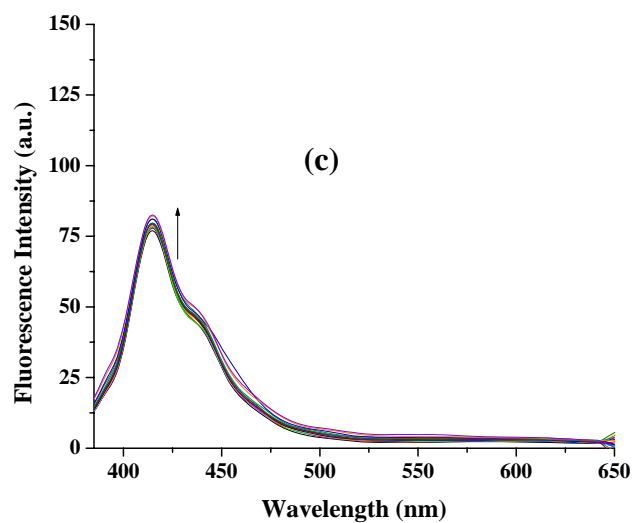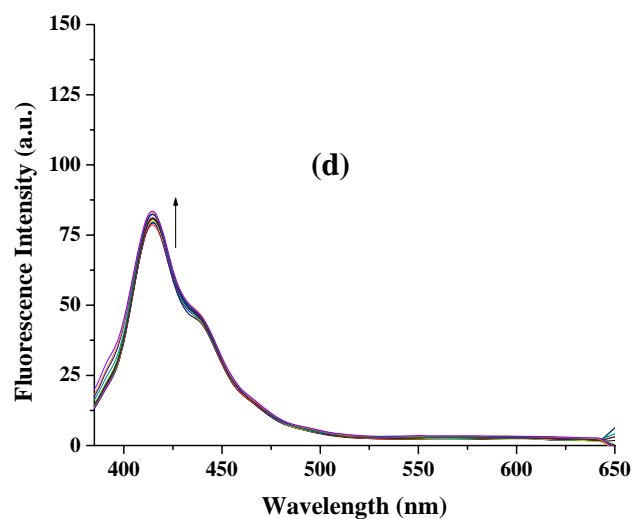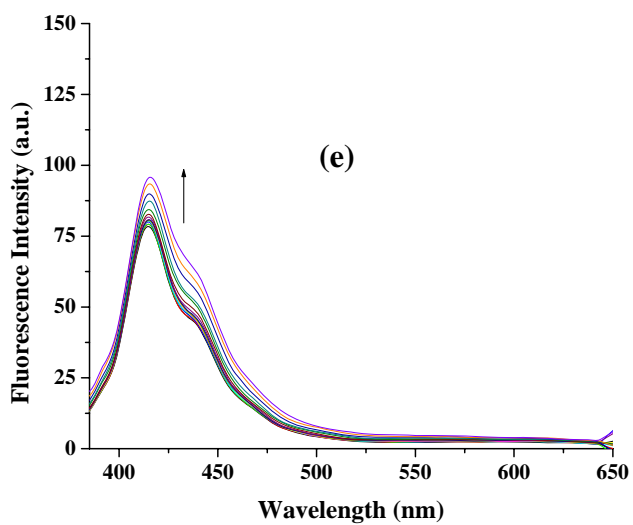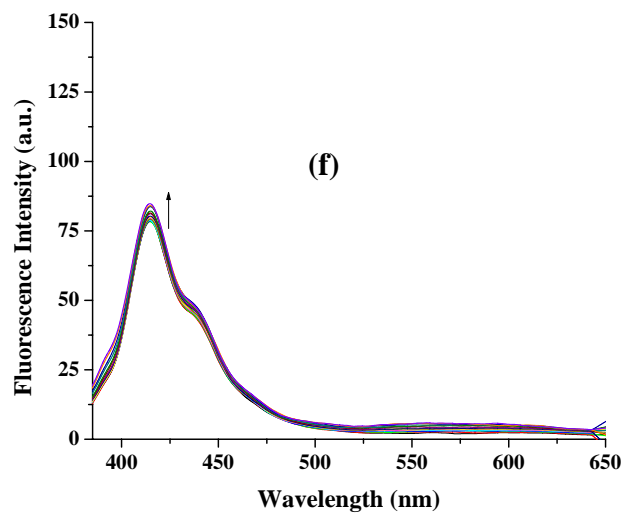

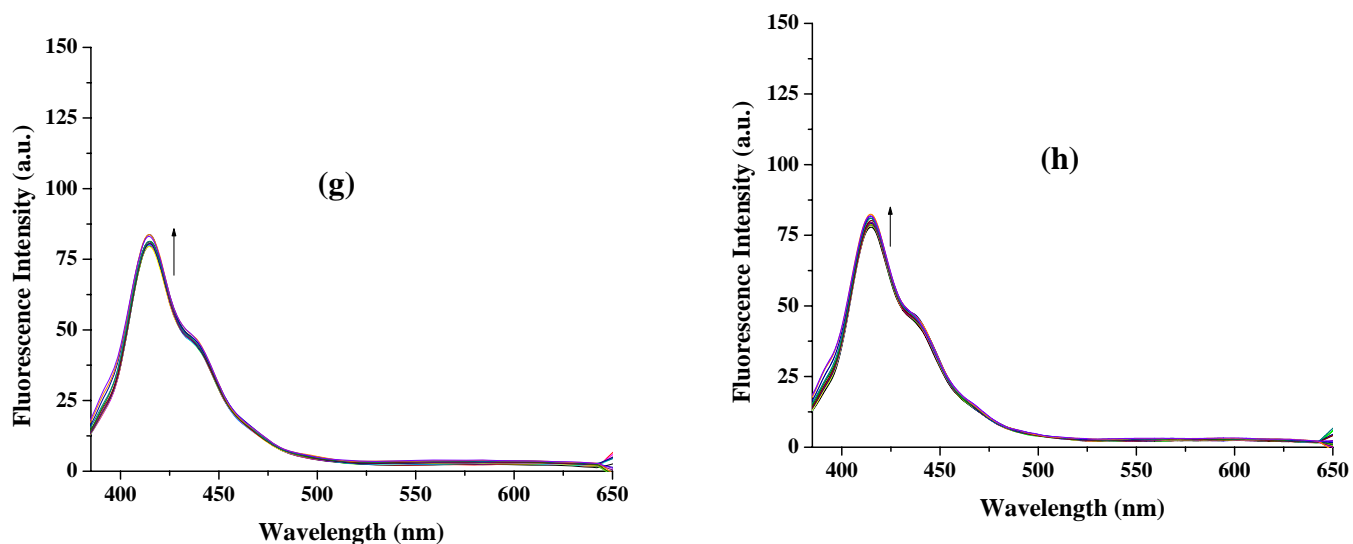

**Figure S1e.** Fluorescence titration curve of receptor **3** ( $c = 5.65 \times 10^{-5}$  M) with the tetrabutylammonium (a) fluoride, (b) acetate, (c) propanoate, (d) hydrogensulphate, (e) salt of ibuprofen, (f) benzoate, (g) chloride, (h) bromide in  $\text{CH}_3\text{CN}$  (concentration of all guests  $c = 2.5 \times 10^{-3}$  M,  $\lambda_{\text{Excitation}} = 370$  nm).

## 2f. Selected UV-vis titration curves for receptor 3 in $\text{CH}_3\text{CN}$ :

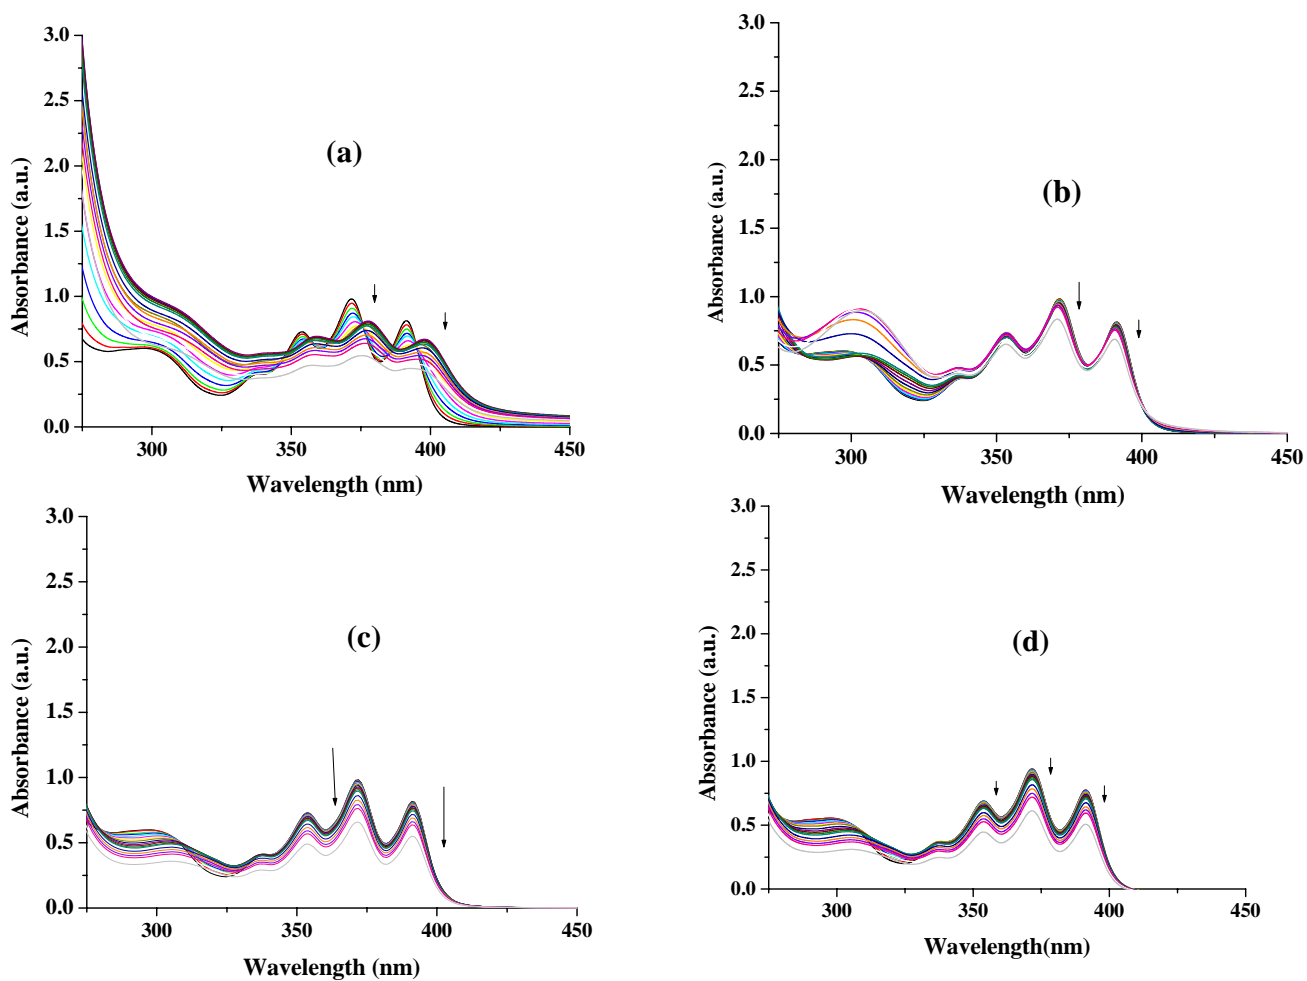

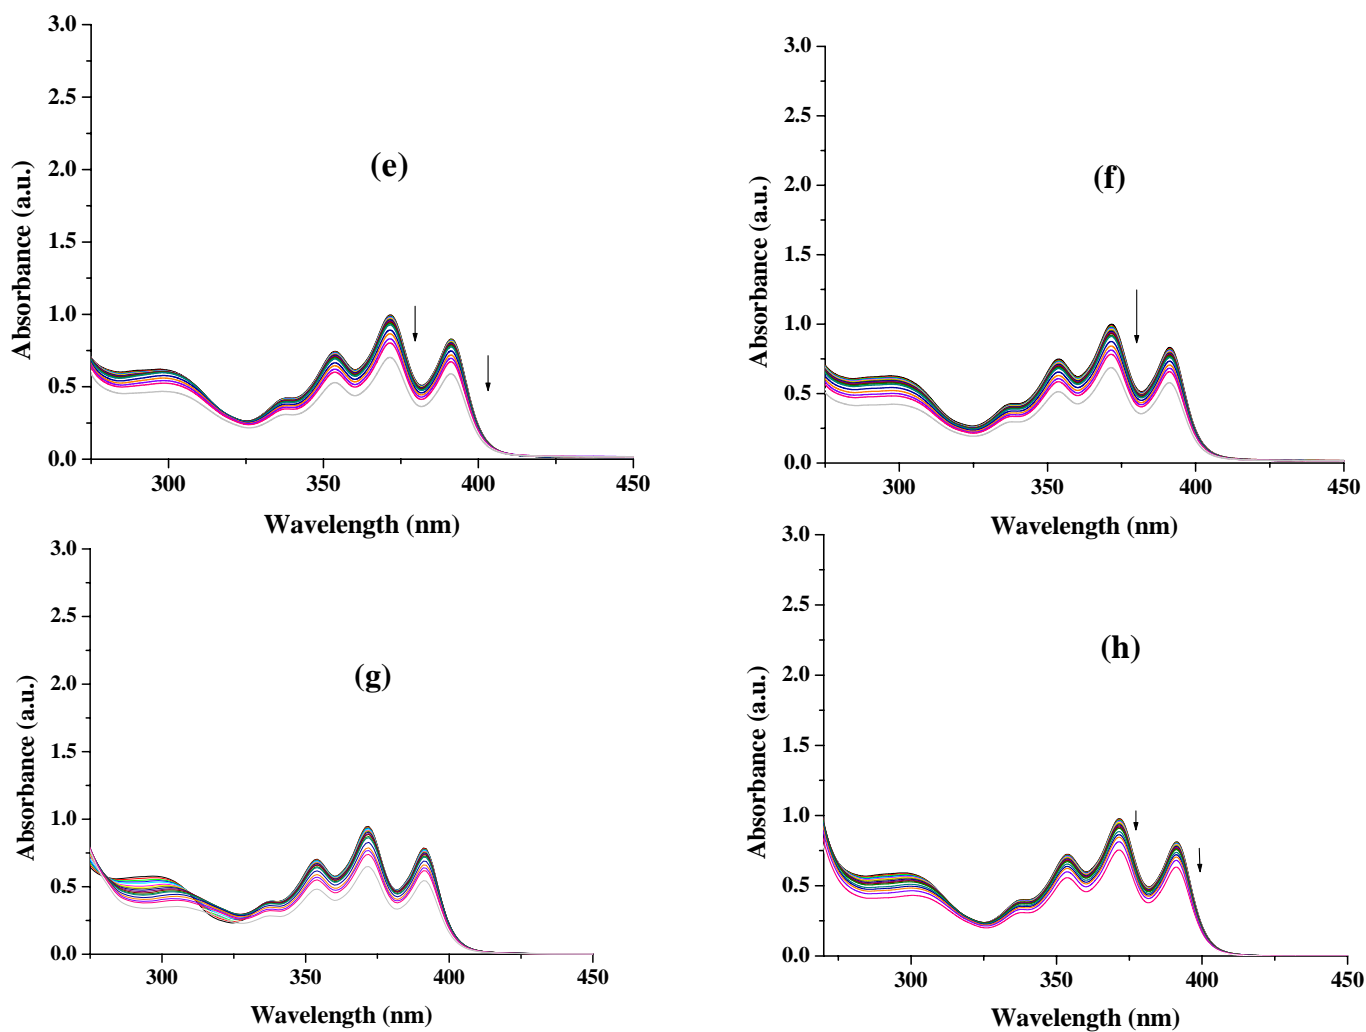

**Figure S1f:** UV-vis titration curve of receptor **3** ( $c = 5.65 \times 10^{-5} \text{ M}$ ) with the tetrabutylammonium (a)  $\text{H}_2\text{PO}_4^-$ , (b) fluoride, (c) acetate, (d) propanoate, (e) salt of ibuprofen, (f) hydrogensulphate (g) chloride, (h) benzoate in  $\text{CH}_3\text{CN}$  (concentration of all guests  $c = 2.5 \times 10^{-3} \text{ M}$ ,  $\lambda_{\text{max}} = 371 \text{ nm}$ ).

## 2g. Selected emission titration curves for receptor 4 in $\text{CH}_3\text{CN}$ with following anions

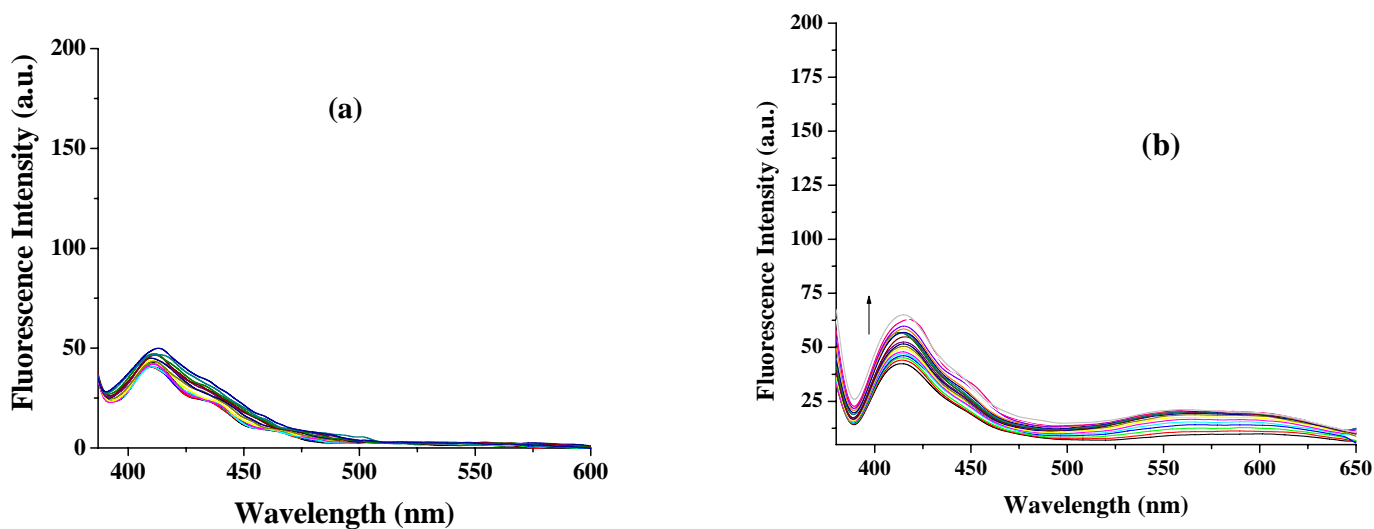

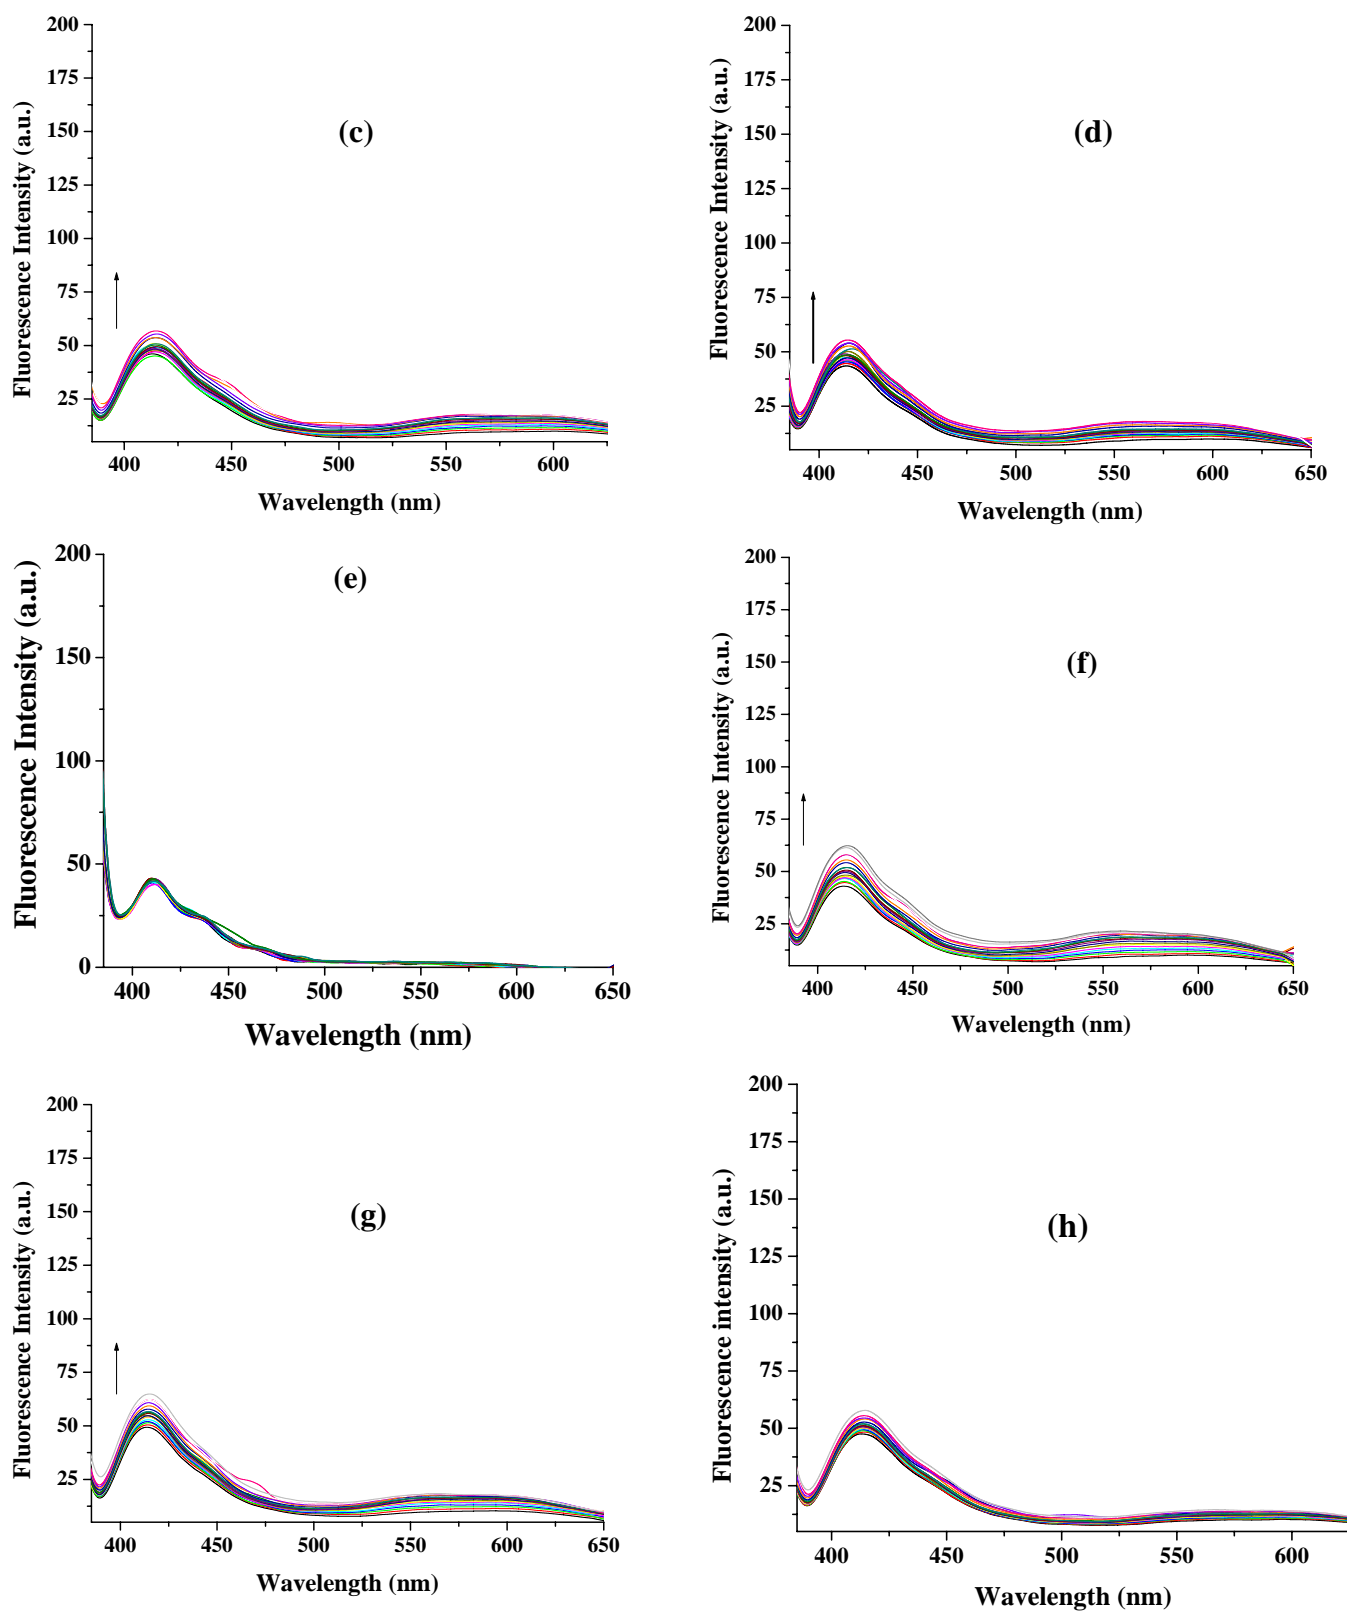

**Figure S1g.** Fluorescence titration curve of receptor 4 ( $c = 5.65 \times 10^{-5}$  M) with the tetrabutylammonium (a) fluoride, (b) acetate, (c) propanoate, (d) hydrogensulphate, (e) salt of ibuprofen, (f) benzoate, (g) chloride, (h) bromide in CH<sub>3</sub>CN (concentration of all guests  $c = 2.5 \times 10^{-3}$  M,  $\lambda_{\text{Excitation}} = 370$  nm).

## 2h. Selected UV-vis titration curves for receptor 4 in CH<sub>3</sub>CN:

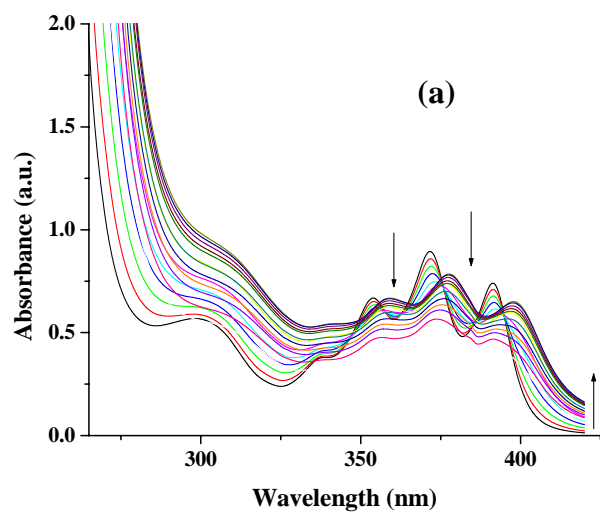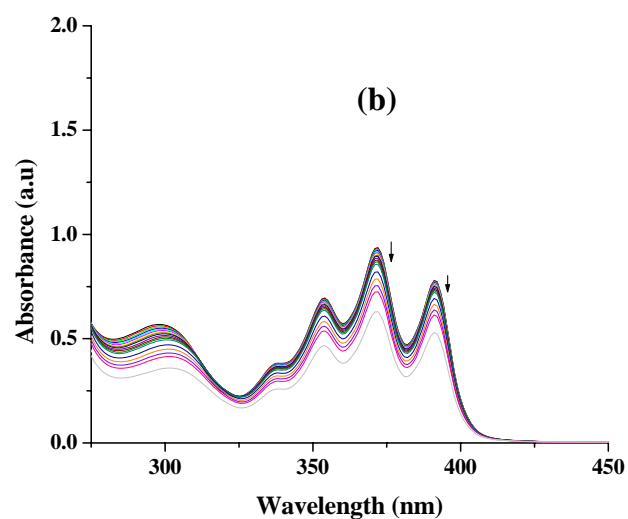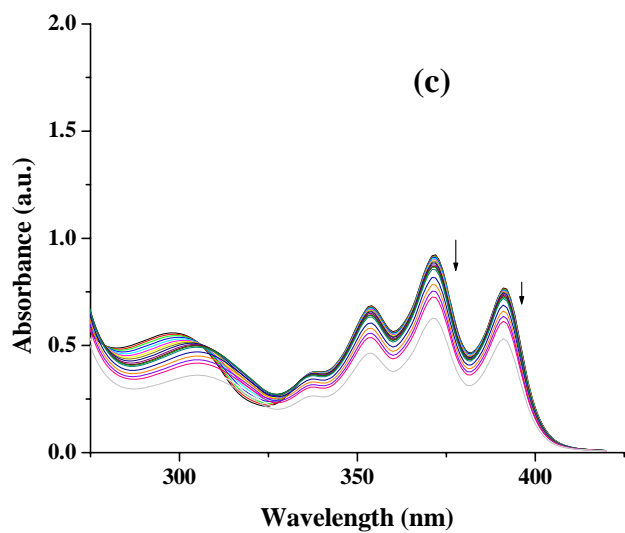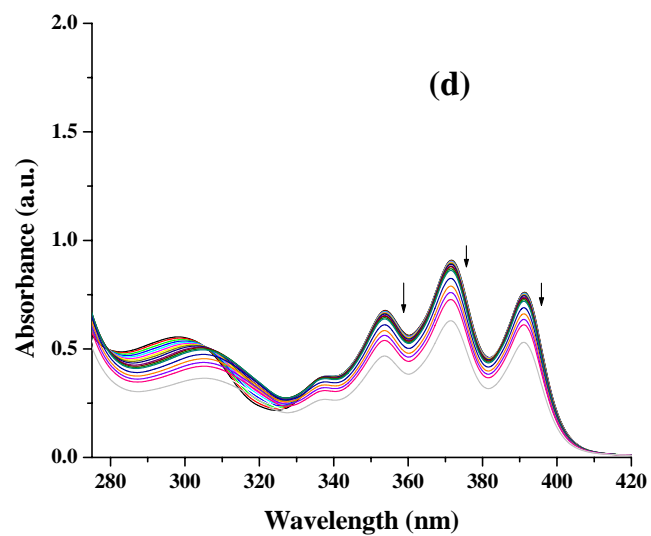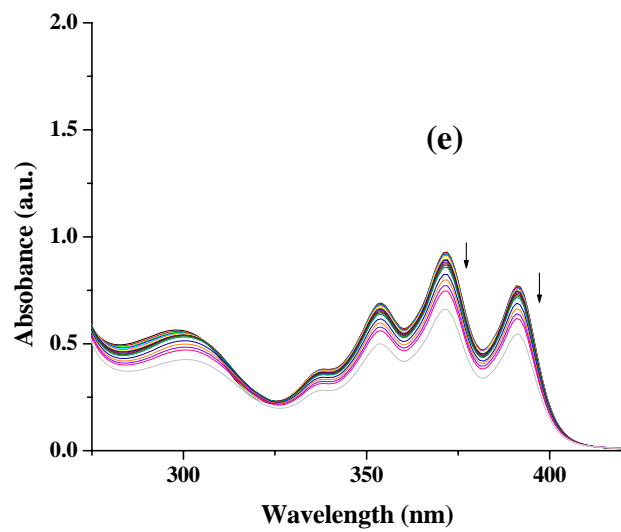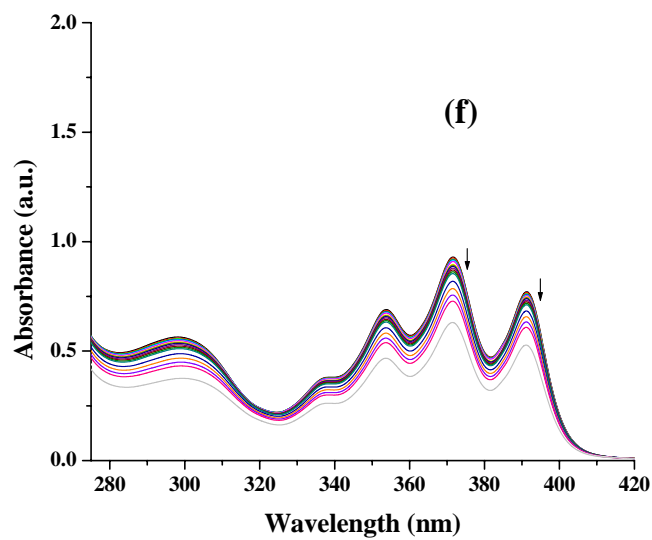

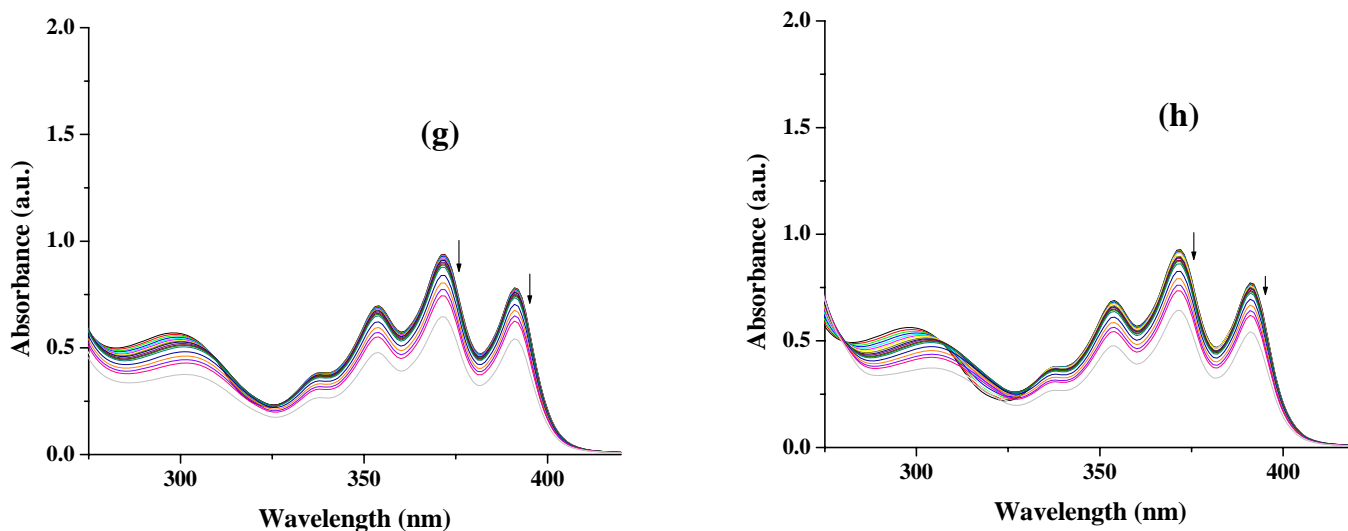

**Figure S1h:** UV-vis titration curve of receptor **3** ( $c = 5.65 \times 10^{-5}$  M) with the tetrabutylammonium (a)  $\text{H}_2\text{PO}_4^-$ , (b) fluoride, (c) acetate, (d) propanoate, (e) salt of ibuprofen, (f) hydrogensulphate (g) chloride, (h) benzoate in  $\text{CH}_3\text{CN}$  (concentration of all guests  $c = 2.5 \times 10^{-3}$  M,  $\lambda_{\text{max}} = 371$  nm).

### 3a. Job plots from fluorescence of 1 and 2.

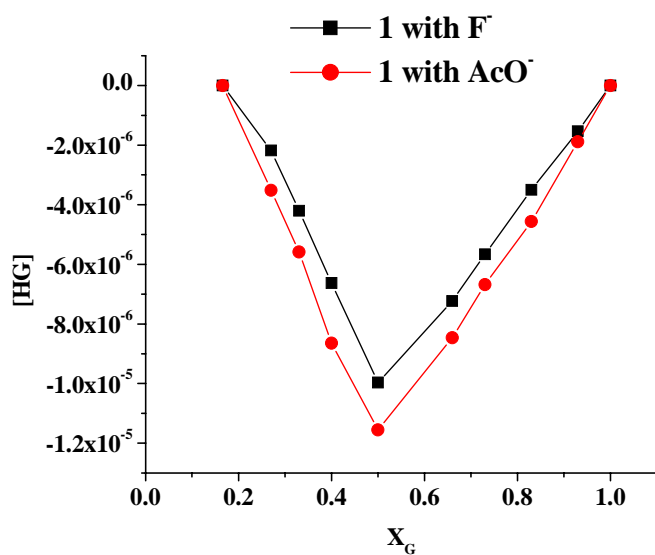

**Figure S2a.** Job plot of **1** ( $c = 5.65 \times 10^{-5}$  M) with tetrabutylammonium  $\text{F}^-$  ( $c = 5.65 \times 10^{-5}$  M) and  $\text{AcO}^-$  ( $c = 5.65 \times 10^{-5}$  M) at 412 nm from fluorescence in  $\text{CH}_3\text{CN}$  at 25 °C

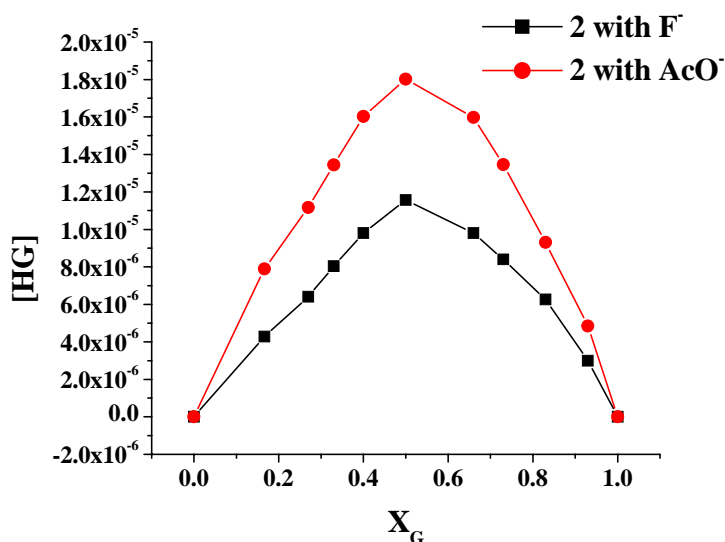

**Figure S2b.** Job plot of **2** ( $c = 5.65 \times 10^{-5}$  M) with tetrabutylammonium  $\text{F}^-$  ( $c = 5.65 \times 10^{-5}$  M) and  $\text{AcO}^-$  ( $c = 5.65 \times 10^{-5}$  M) at 412 nm from fluorescence in  $\text{CH}_3\text{CN}$  at 25 °C



### 3b. Job plots from UV-vis.

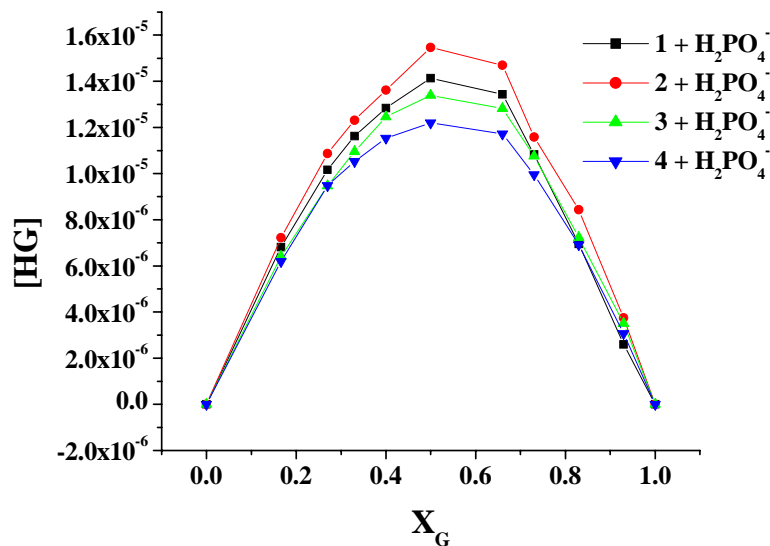

**Figure S2c.** Job plots of **1** to **4** with tetrabutylammonium  $\text{H}_2\text{PO}_4^-$  at 371 nm from UV-vis in  $\text{CH}_3\text{CN}$  ( $[\text{G}] = [\text{H}] = 5.65 \times 10^{-5} \text{ M}$ ).

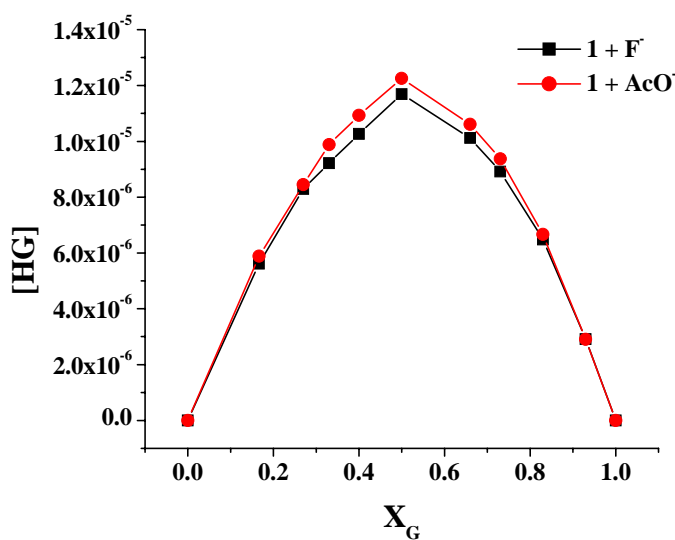

**Figure S2d.** Job plot of **1** ( $c = 5.65 \times 10^{-5} \text{ M}$ ) with tetrabutylammonium  $\text{F}^-$  ( $c = 5.65 \times 10^{-5} \text{ M}$ ) and  $\text{AcO}^-$  ( $c = 5.65 \times 10^{-5} \text{ M}$ ) at 371 nm from UV-vis in  $\text{CH}_3\text{CN}$ .

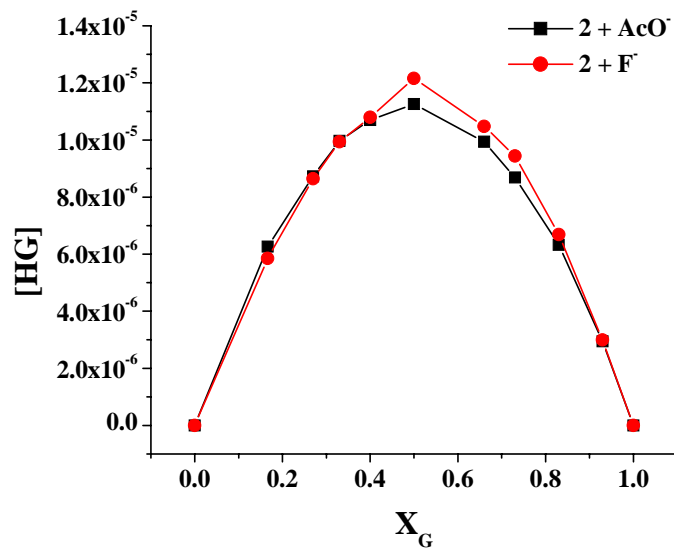

**Figure S2e.** Job plot of **2** ( $c = 5.65 \times 10^{-5} \text{ M}$ ) with tetrabutylammonium  $\text{F}^-$  ( $c = 5.65 \times 10^{-5} \text{ M}$ ) and  $\text{AcO}^-$  ( $c = 5.65 \times 10^{-5} \text{ M}$ ) at 371 nm from UV-vis in  $\text{CH}_3\text{CN}$ .

**4a. Binding constant curves for receptor 1-4 with tetrabutylammonium dihydrogenphosphate from fluorescence in CH<sub>3</sub>CN:**

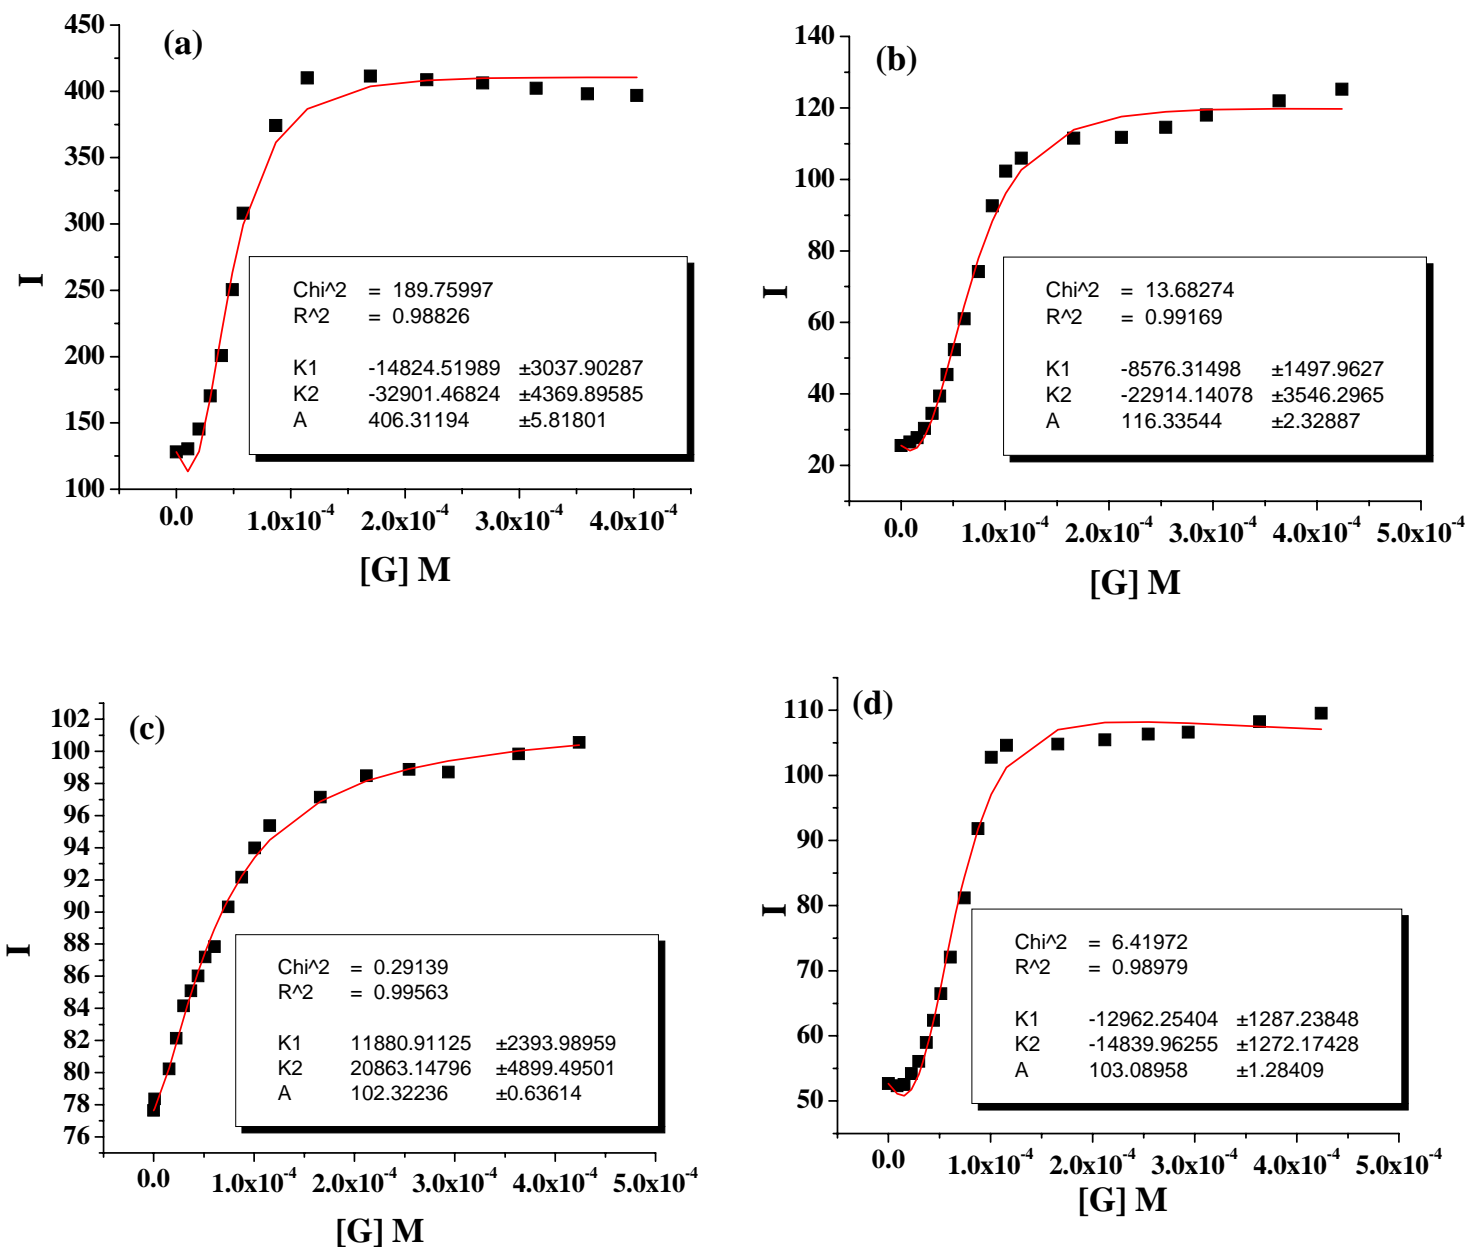

**Figure S3a:** Binding constant curves of receptor (a) **1**, (b) **2**, (c) **3** and (d) **4** with the tetrabutylammonium H<sub>2</sub>PO<sub>4</sub><sup>-</sup> from fluorescence titration in CH<sub>3</sub>CN. Working formula

$I = (I_0 + K_1 \times C_G \times I_{(1:1)} + K_1 \times K_2 \times I_{lim} \times C_G^2) / (1 + K_1 \times C_G + K_1 \times K_2 \times C_G^2)$  where  $I_0$  = intensity of receptor solution,  $I$  = intensity after successive addition of guest into the receptor solution,  $I_{(1:1)}$  = intensity at 1:1,  $I_{lim}$  = represent the intensity at infinite guest concentration  $C_G = [G]$ . ( $\lambda_{max} = 412$  nm,  $[H] = 5.65 \times 10^{-5}$  M and  $[G] = 2.5 \times 10^{-3}$  M).

**4b. Binding constant curves for receptor 1 and 2 with F<sup>-</sup> and AcO<sup>-</sup> from fluorescence in CH<sub>3</sub>CN:**

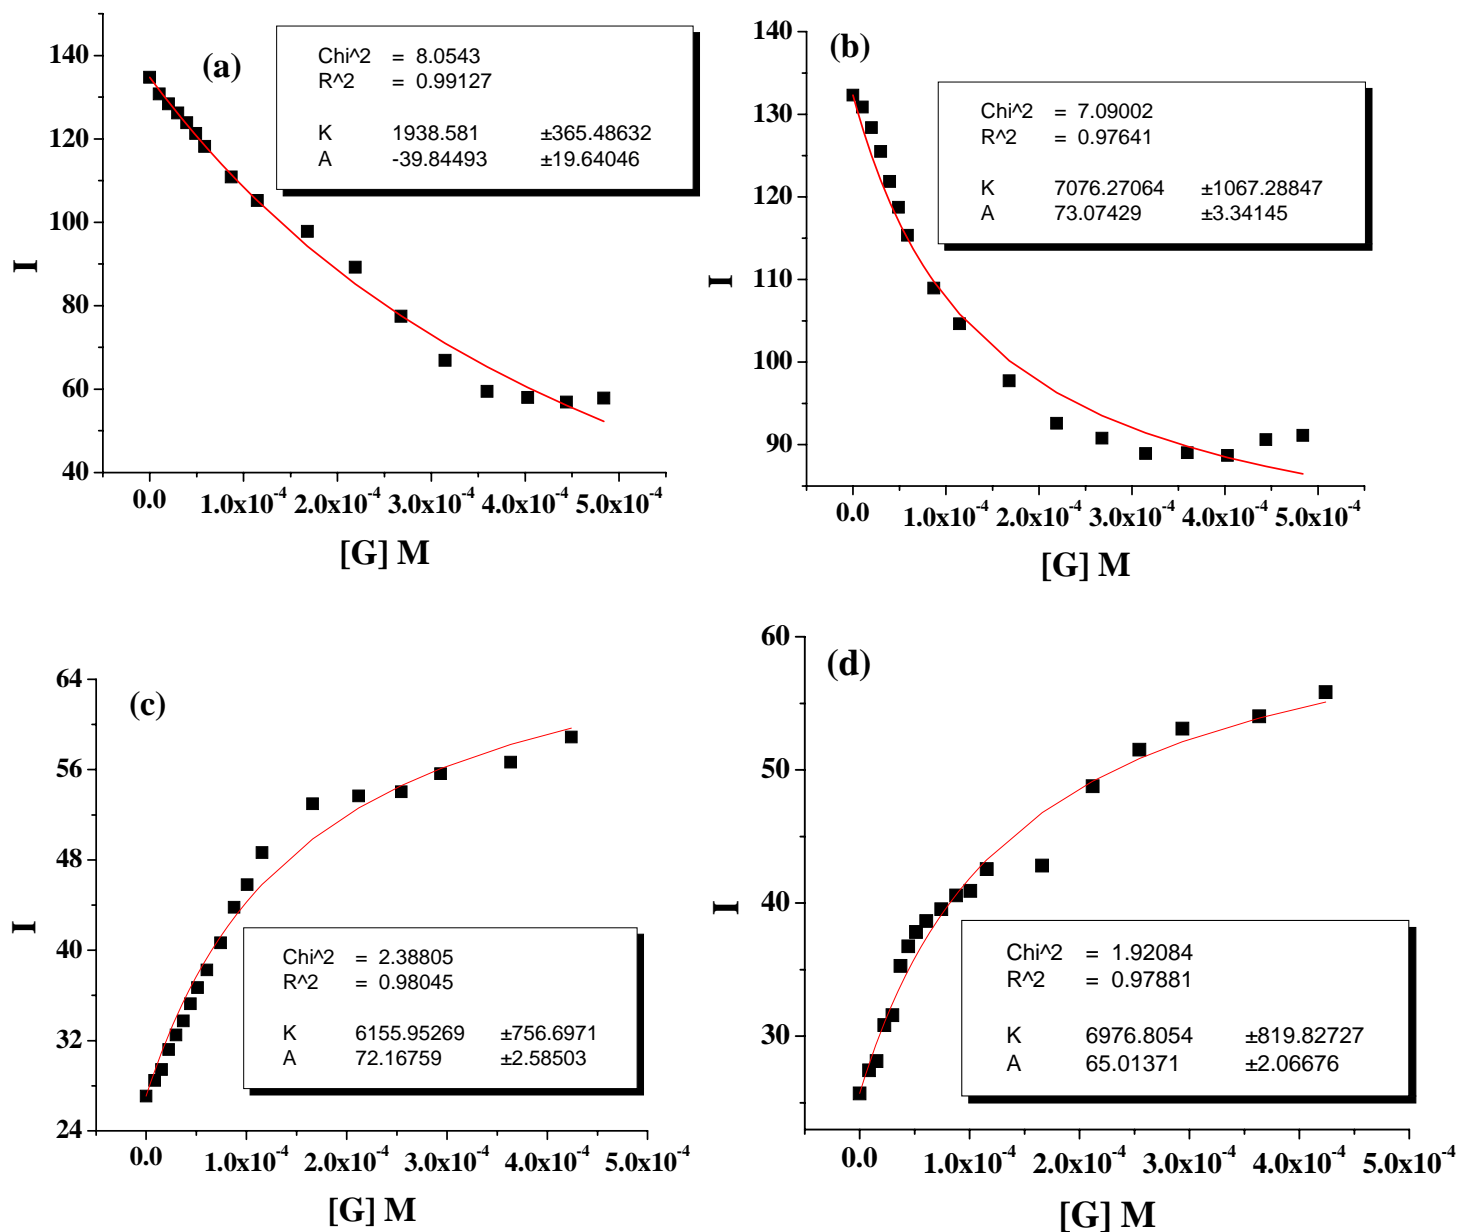

**Figure S3b:** Binding constant curves of receptor (a) 1, (b) 2, (c) 3 and (d) 4 with the tetrabutylammonium dihydrogenphosphate from UV-vis titration in CH<sub>3</sub>CN. Working formula  $I = I_0 + (I - I_0) / (2 \times C_H) \{ (C_G + C_H + 1/K) - [(C_G + C_H + 1/K)^2 - 4 \times C_G \times C_H]^{0.5} \}$ , where  $I_0$  = emission intensity of receptor,  $I$  = emission intensity after successive addition of guest,  $C_G = [G]$ ,  $C_H = [H]$ . ( $\lambda_{max} = 371$  nm,  $[H] = 5.65 \times 10^{-5}$  M and  $[G] = 2.5 \times 10^{-3}$  M).

#### 4c. Binding constant curves for receptor 1-4 with tetrabutylammonium dihydrogenphosphate from UV-vis in CH<sub>3</sub>CN:

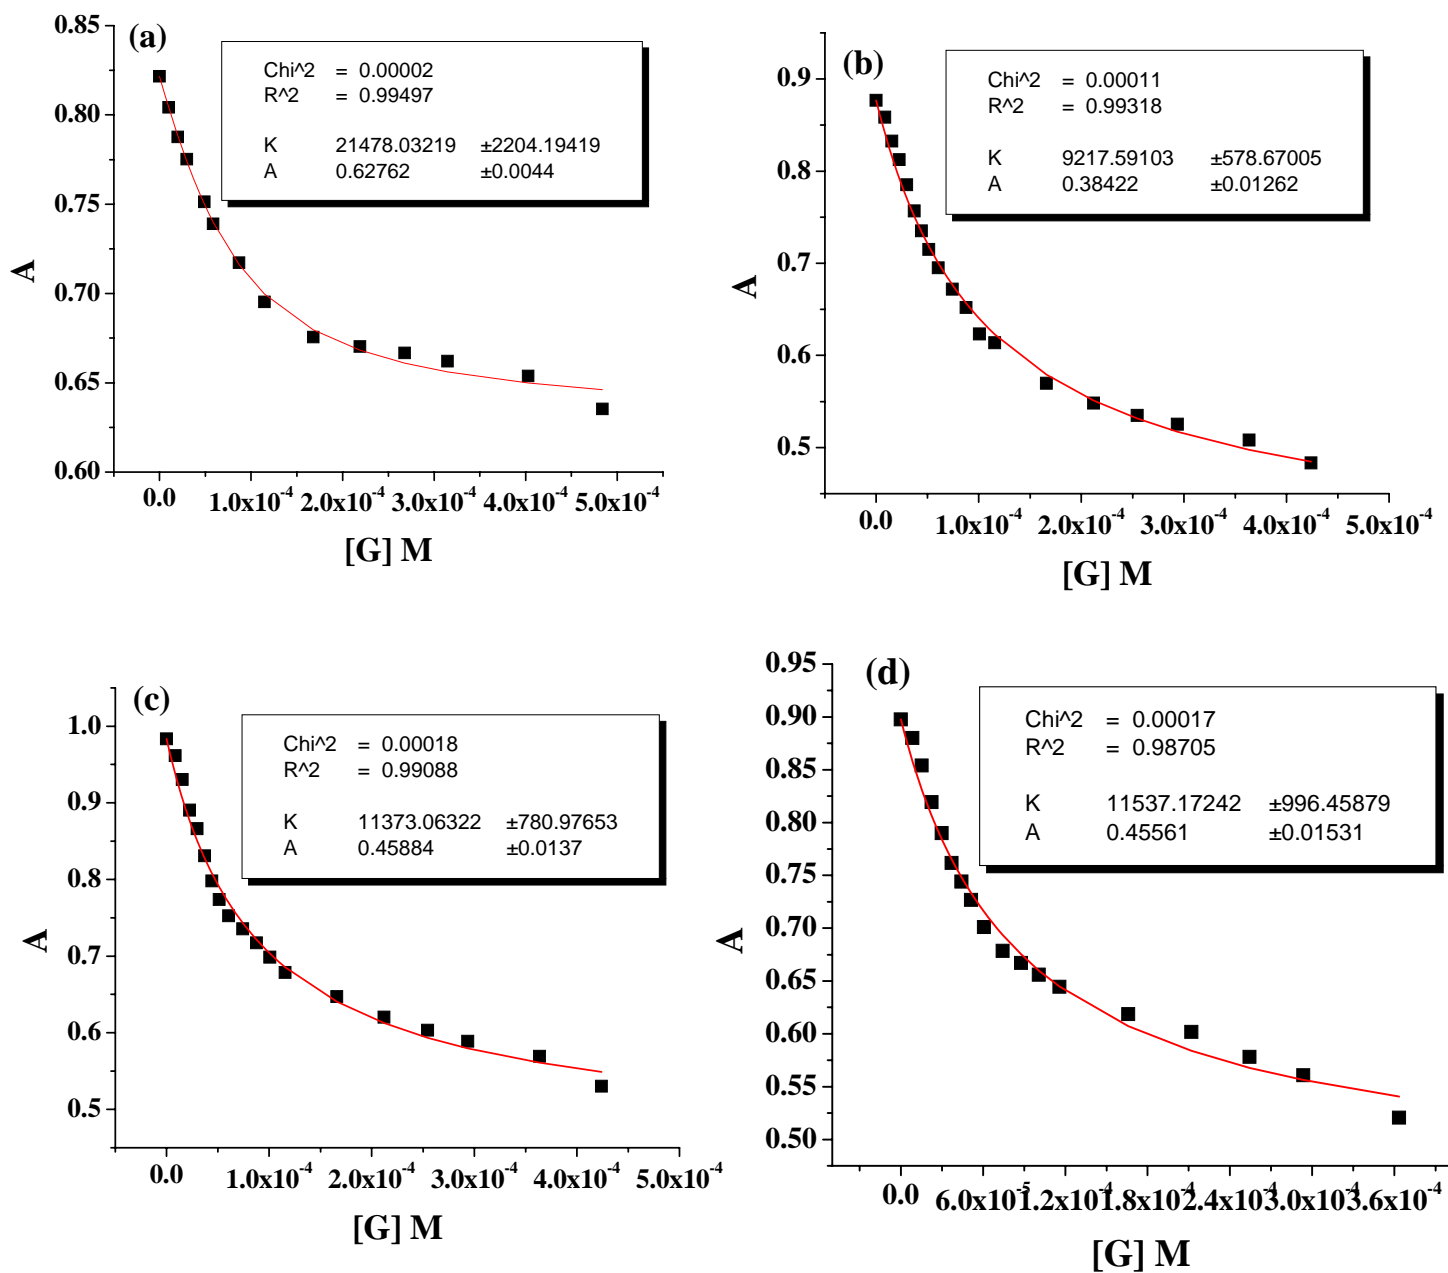

**Figure S3c:** Binding constant curves of receptor 1 with (a) fluoride, (b) acetate and receptor 2 with (c) fluoride and (d) acetate from fluorescence titration in CH<sub>3</sub>CN. Working formula  $A = A_0 + (A - A_0) / 2 \times C_H \times \{C_G + C_H + 1/K - [(C_G + C_H + 1/K)^2 - 4 \times C_G \times C_H]^{0.5}\}$  where  $A_0$  = absorption of receptor,  $A$  = absorption after successive addition of guest,  $C_G = [G]$ ,  $C_H = [H]$ . ( $\lambda_{max} = 412$  nm,  $[H] = 5.65 \times 10^{-5}$  M and  $[G] = 2.5 \times 10^{-3}$  M).

### 5. Reversibility experiment of receptor 2 -4 for $\text{H}_2\text{PO}_4^-$ in $\text{CH}_3\text{CN}$ from fluorescence.

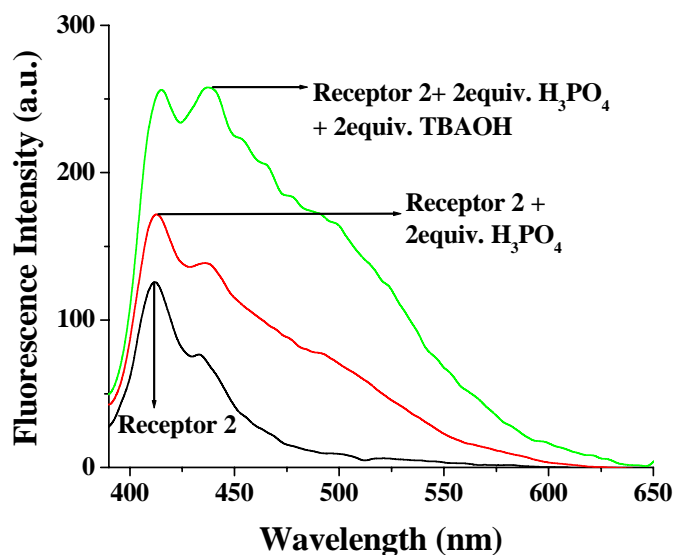

**Figure S4a.** Emission profile for sensitivity of  $\text{H}_2\text{PO}_4^-$  over  $\text{H}_3\text{PO}_4$  receptor 2 and the reversibility in the process.

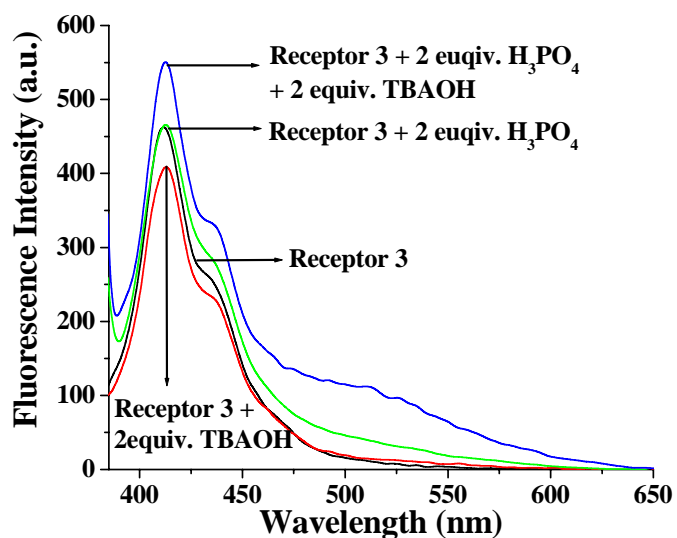

**Figure S4b.** Emission profile for sensitivity of  $\text{H}_2\text{PO}_4^-$  over  $\text{H}_3\text{PO}_4$  receptor 3 and the reversibility in the process.

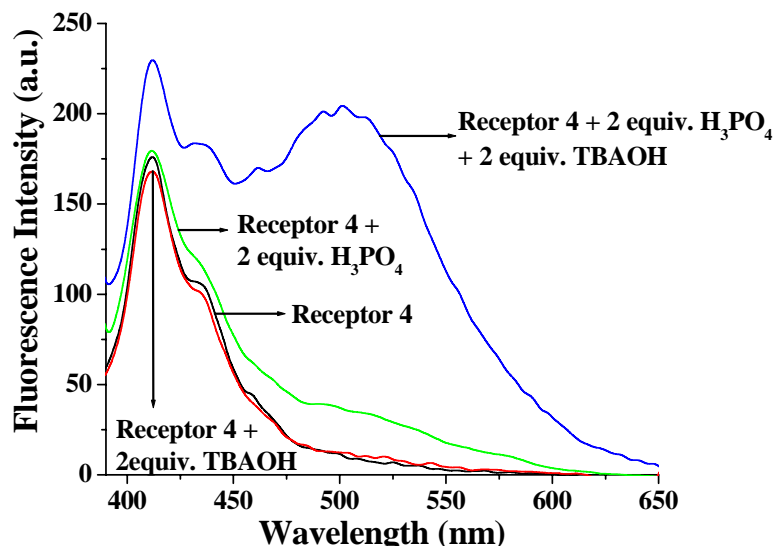

**Figure S4c.** Emission profile for sensitivity of  $\text{H}_2\text{PO}_4^-$  over  $\text{H}_3\text{PO}_4$  receptor 4 and the reversibility in the process.

### 6a. Emission titration curves for receptor 3 in CH<sub>3</sub>CN with dicarboxylate.

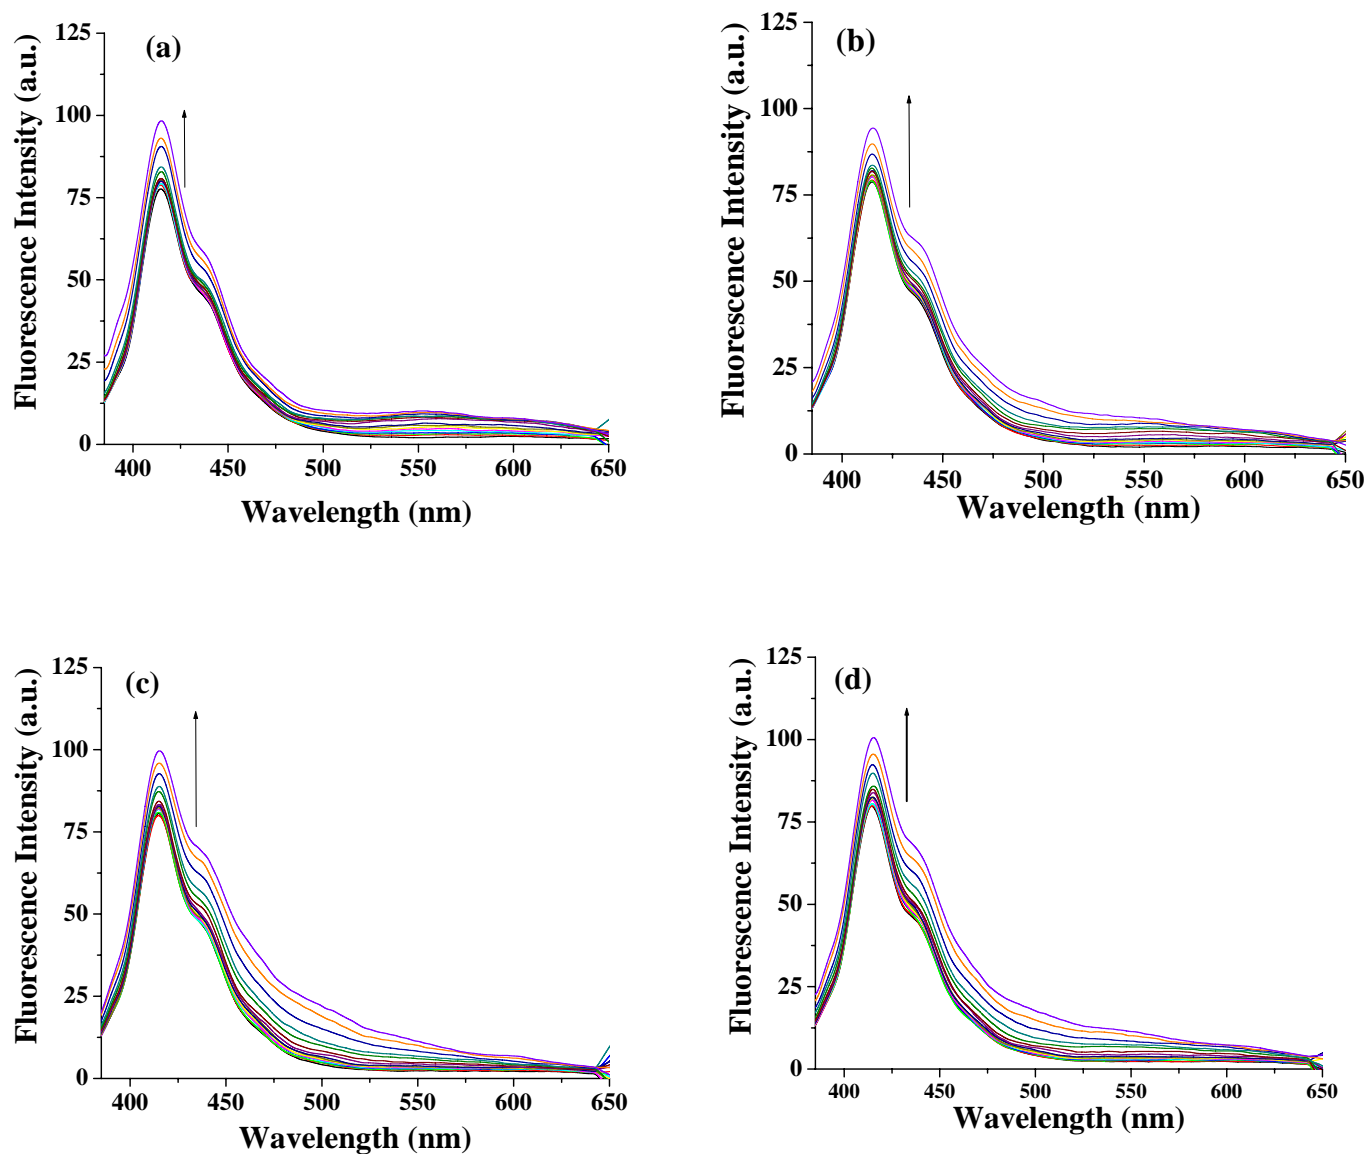

**Figure S5a.** Fluorescence titration curve of receptor 3 ( $c = 5.65 \times 10^{-5}$  M) with the tetrabutylammonium (a) Adipate, (b) Glutarate, (c) Malonate and (d) Succinate in CH<sub>3</sub>CN (concentration of all guests  $c = 2.5 \times 10^{-3}$  M,  $\lambda_{\text{max}} = 412$  nm).

### 6b. Emission titration curves for receptor 4 with dicarboxylate in CH<sub>3</sub>CN.

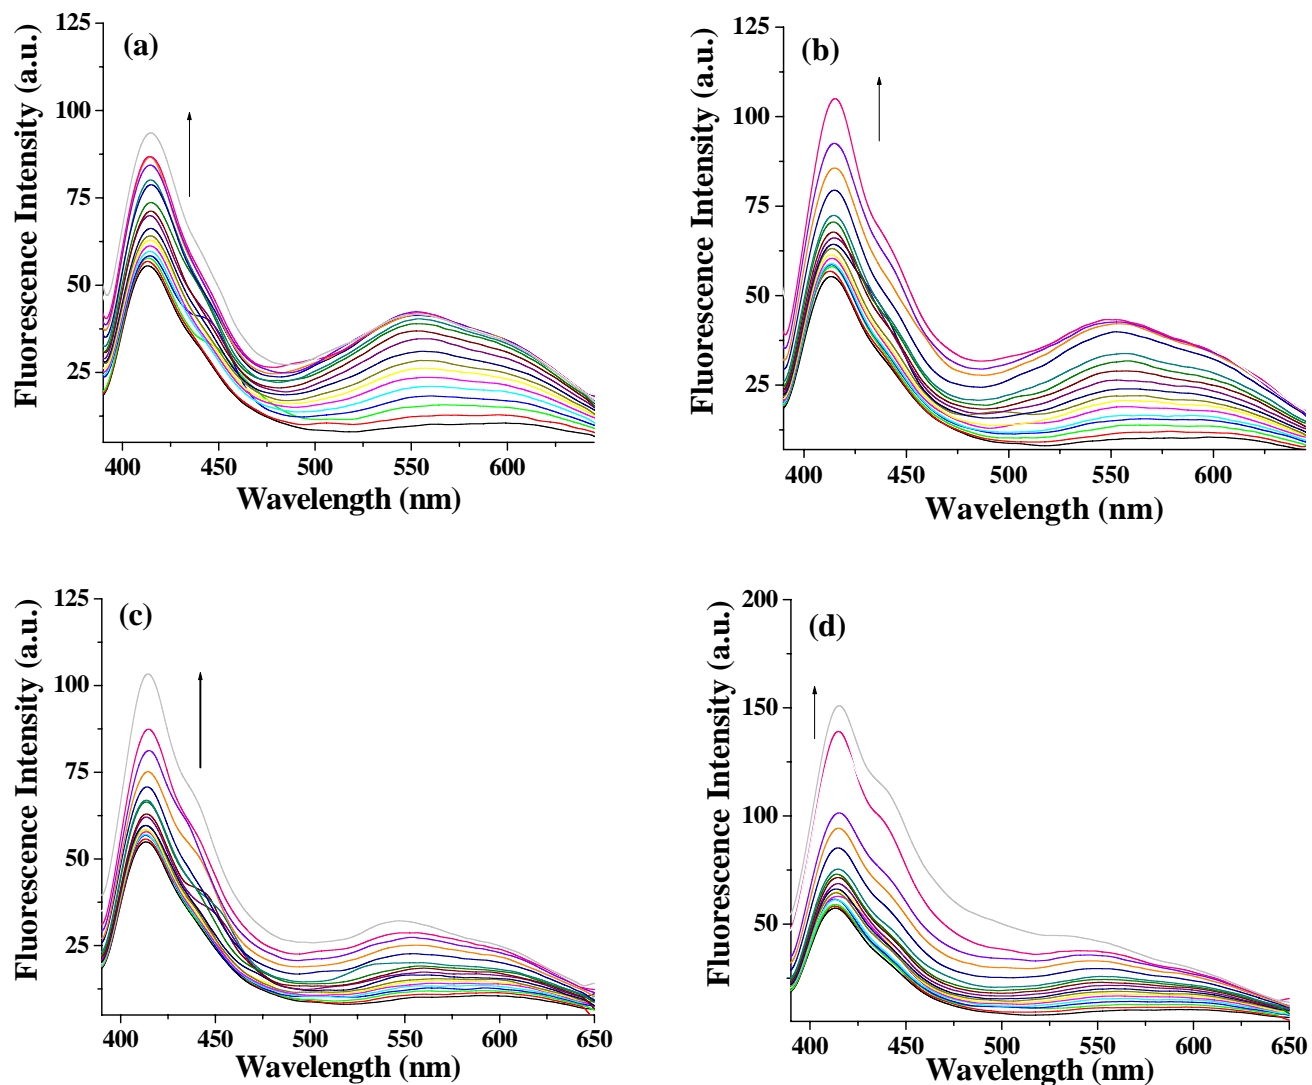

**Figure S5b.** Fluorescence titration curve of receptor **4** ( $c = 5.65 \times 10^{-5}$  M) with the tetrabutylammonium (a) Adipate, (b) Glutarate, (c) Malonate and (d) Succinate in CH<sub>3</sub>CN (concentration of all guests  $c = 2.5 \times 10^{-3}$  M,  $\lambda_{\text{max}} = 412$  nm).

### 6c. UV-vis titration curves for receptor 3 with dicarboxylate in CH<sub>3</sub>CN.

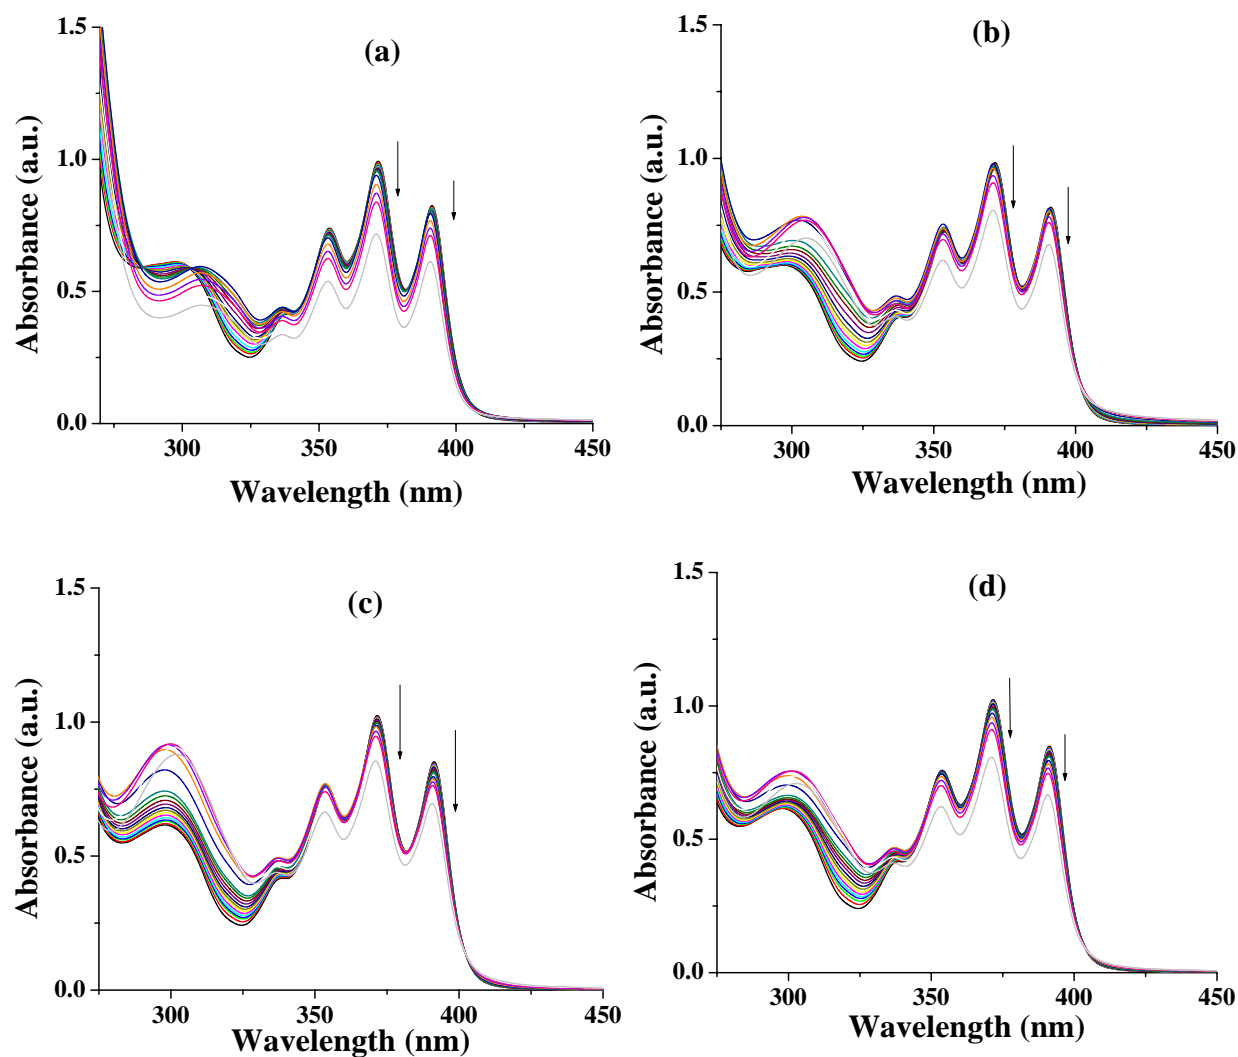

**Figure S5c:** UV-vis titration curve of receptor 3 ( $c = 5.65 \times 10^{-5}$  M) with the tetrabutylammonium (a) Adipate, (b) Glutarate, (c) Malonate and (d) Succinate in CH<sub>3</sub>CN (concentration of all guests  $c = 2.5 \times 10^{-3}$  M,  $\lambda_{\text{max}} = 371$  nm).



6d. UV-vis titration curves for receptor 4 with dicarboxylate in CH<sub>3</sub>CN.

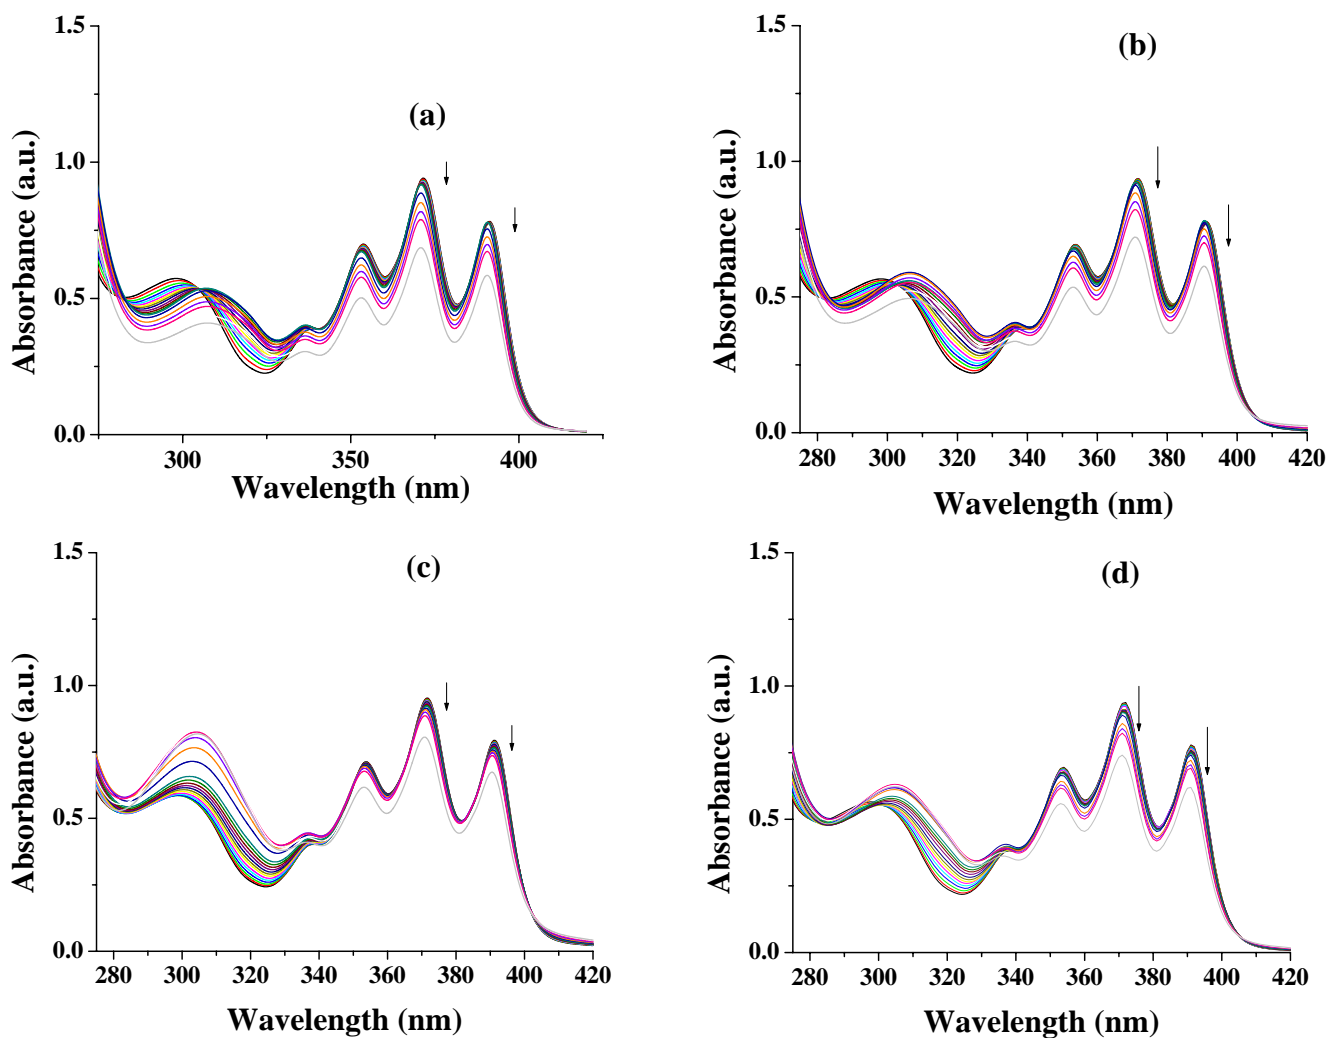

Figure S5d. UV-vis titration curve of receptor 4 ( $c = 5.65 \times 10^{-5}$  M) with the tetrabutylammonium (a) Adipate, (b) Glutarate, (c) Malonate and (d) Succinate in CH<sub>3</sub>CN (concentration of all guests  $c = 2.5 \times 10^{-3}$  M,  $\lambda_{\text{max}} = 371$  nm).

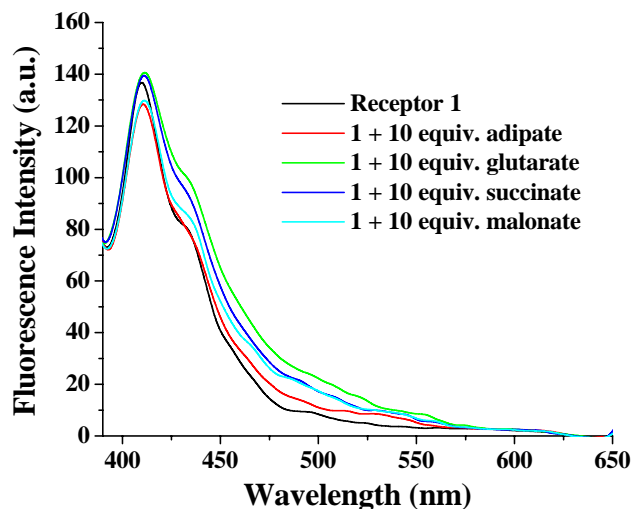

**Figure S5e:** Fluorescence emission change of **1** ( $c = 5.65 \times 10^{-5} \text{M}$ ) with addition of 10 equiv. amounts of tetrabutylammonium (a) adipate, (b) glutarate (c) succinate and (d) malonate  $\text{CH}_3\text{CN}$ .  $\lambda_{\text{Excitation}} = 370 \text{ nm}$ .

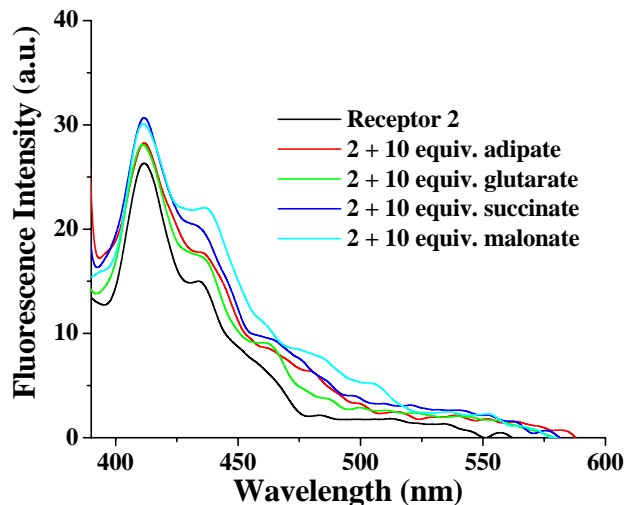

**Figure S5f:** Fluorescence emission change of **2** ( $c = 5.65 \times 10^{-5} \text{M}$ ) with addition of 10 equiv. amounts of tetrabutylammonium (a) adipate, (b) glutarate (c) succinate and (d) malonate  $\text{CH}_3\text{CN}$ .  $\lambda_{\text{Excitation}} = 370 \text{ nm}$ .

### 7. Change in absorption with guest to host ratio for receptor 1 - 4 with various anions at 371 nm in $\text{CH}_3\text{CN}$ .

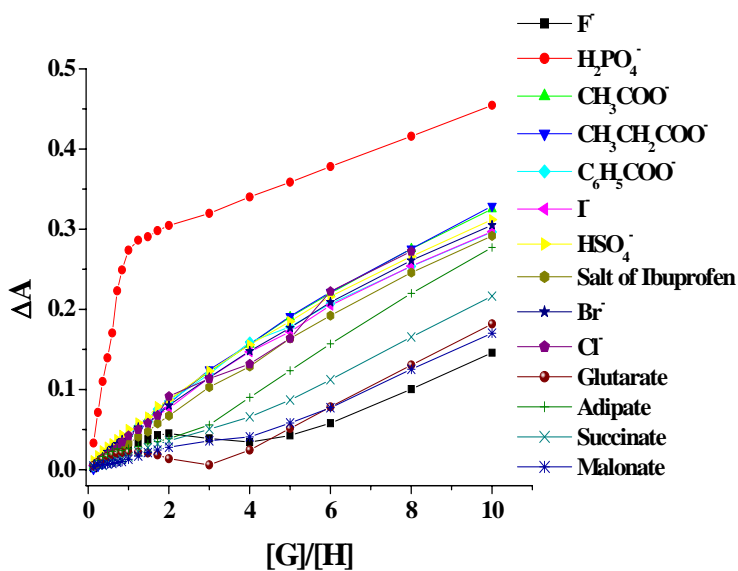

**Figure S6a.** UV-vis titration curves ( $[\text{Guest}]/[\text{Host}]$  vs change in absorbance) for **3** (measured at 371 nm) with various anions.

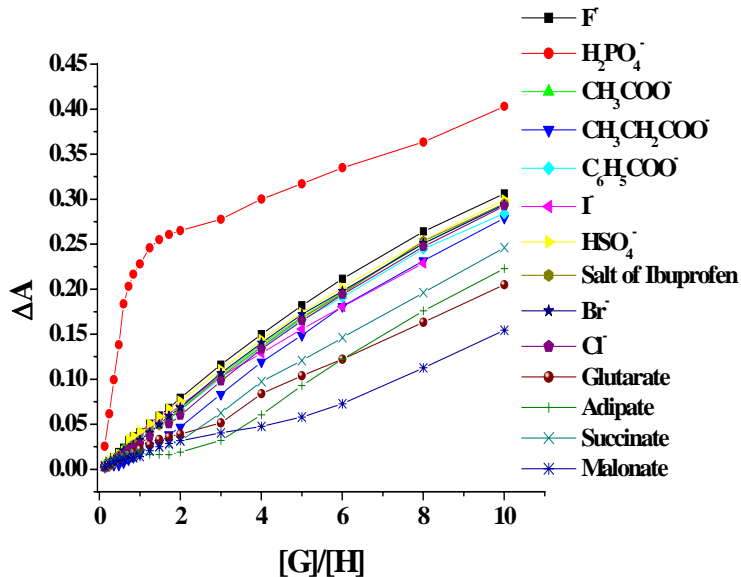

**Figure S6b.** UV-vis titration curves ( $[\text{Guest}]/[\text{Host}]$  vs change in absorbance) for **4** (measured at 371 nm) with various anions.

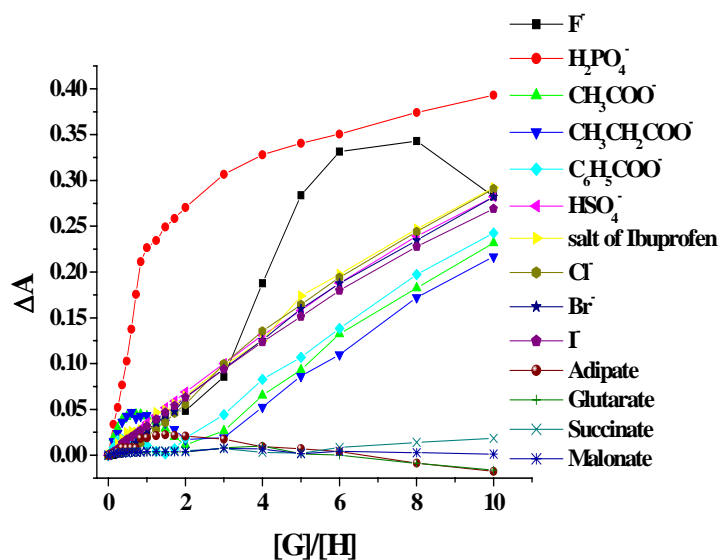

**Figure S6c:** UV-vis titration curves ([Guest]/[Host] vs change in absorbance) for **2** (measured at 371 nm) with various anions.

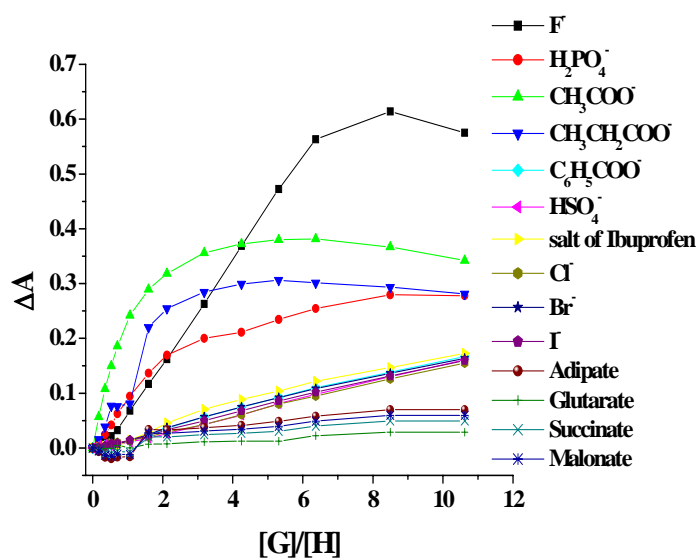

**Figure S6d:** UV-vis titration curves ([Guest]/[Host] vs change in absorbance) for **1** (measured at 371 nm) with various anions.

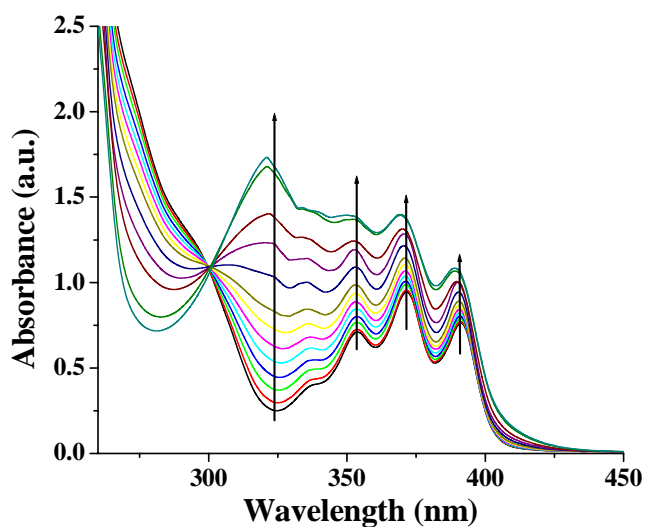

**Figure S6e:** UV-vis titration curve of receptor **1** ( $c = 5.65 \times 10^{-5}$  M) with the tetrabutylammonium hydroxide (TBAOH) in  $\text{CH}_3\text{CN}$  (concentration of guest  $c = 2.5 \times 10^{-3}$  M,  $\lambda_{\text{max}} = 371$  nm).

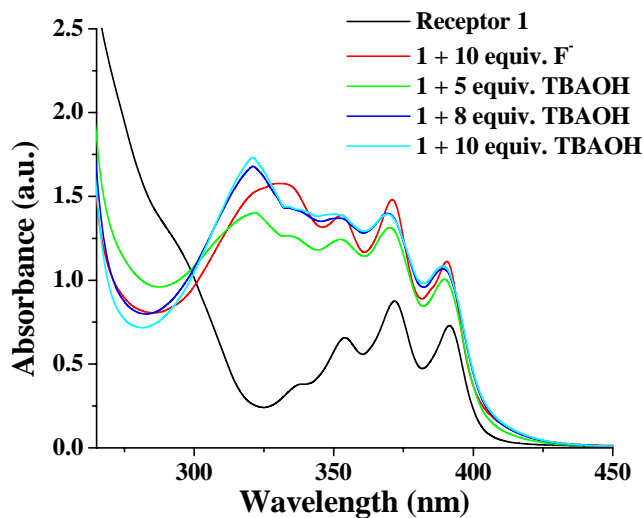

**Figure S6f:** Effect of addition of TBA OH and TBA F on UV-vis spectrum of receptor **1**.

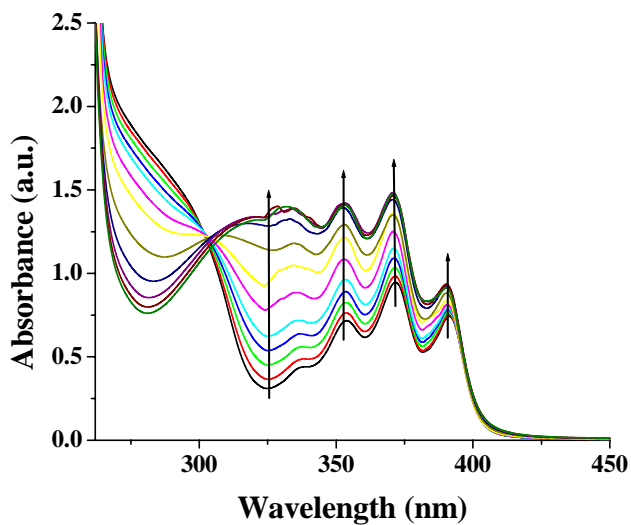

**Figure S6g:** UV-vis titration curve of receptor **2** ( $c = 5.65 \times 10^{-5}$  M) with the tetrabutylammonium hydroxide (TBAOH) in  $\text{CH}_3\text{CN}$  (concentration of guest  $c = 2.5 \times 10^{-3}$  M,  $\lambda_{\text{max}} = 371$  nm).

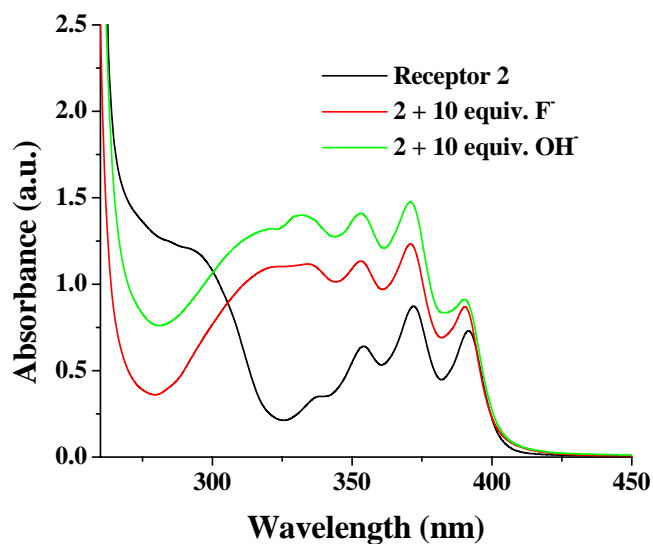

**Figure S6h:** Effect of addition of TBA OH and TBA F on UV-vis spectrum of receptor **2**.

### 8a. Binding constant curves for receptor 3 with dicarboxylates from fluorescence in $\text{CH}_3\text{CN}$ :

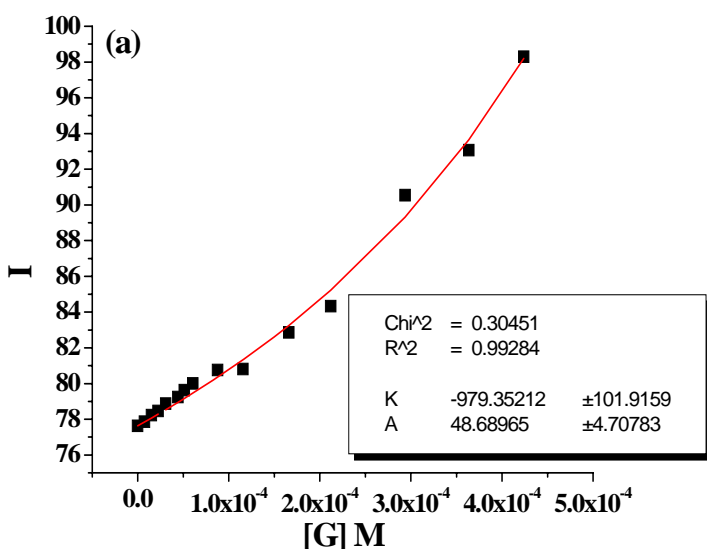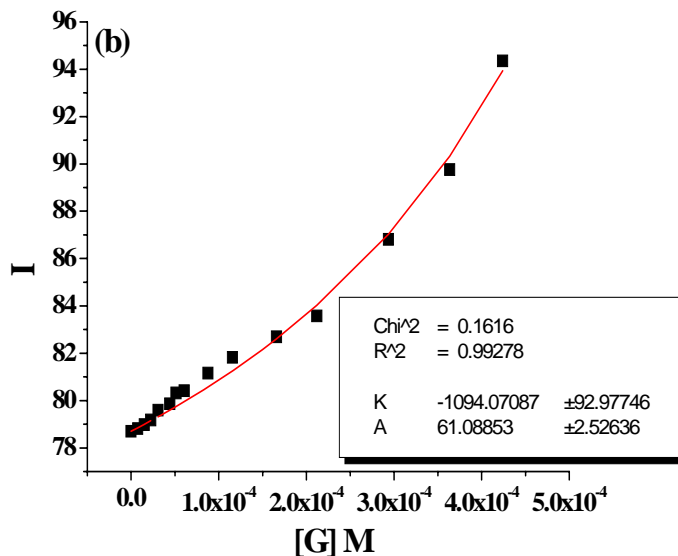

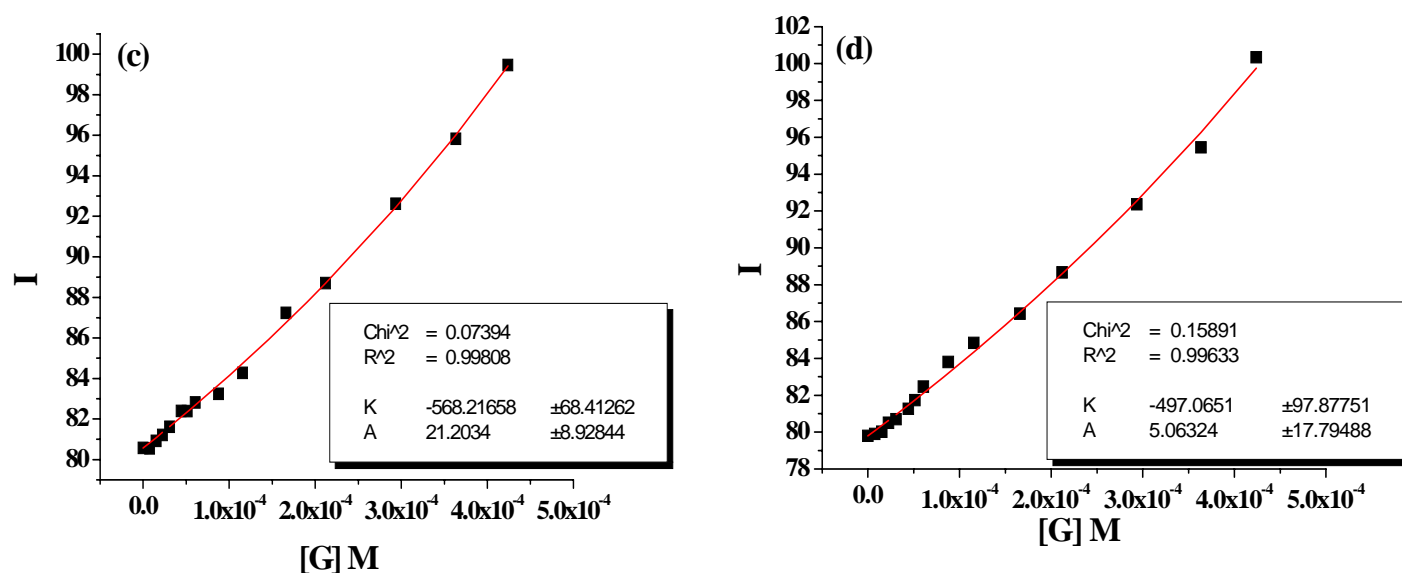

**Figure S7a:** Binding constant curves of receptor **3** with tetrabutylammonium salt of (a) Adipate, (b) Glutarate, (c) Malonate and (d) Succinate from fluorescence titration in CH<sub>3</sub>CN. Working formula

$I = (I_0 + I \times K \times C_G) / (1 + K \times C_G)$ ,  $I_0$  = initial intensity,  $I$  = intensity after successive addition of guest.  $C_G = [G]$ . ( $\lambda_{max} = 412$  nm,  $[H] = 5.65 \times 10^{-5}$  M and  $[G] = 2.5 \times 10^{-3}$  M).

### 8b. Binding constant curves for receptor 4 with dicarboxylates from fluorescence in CH<sub>3</sub>CN:

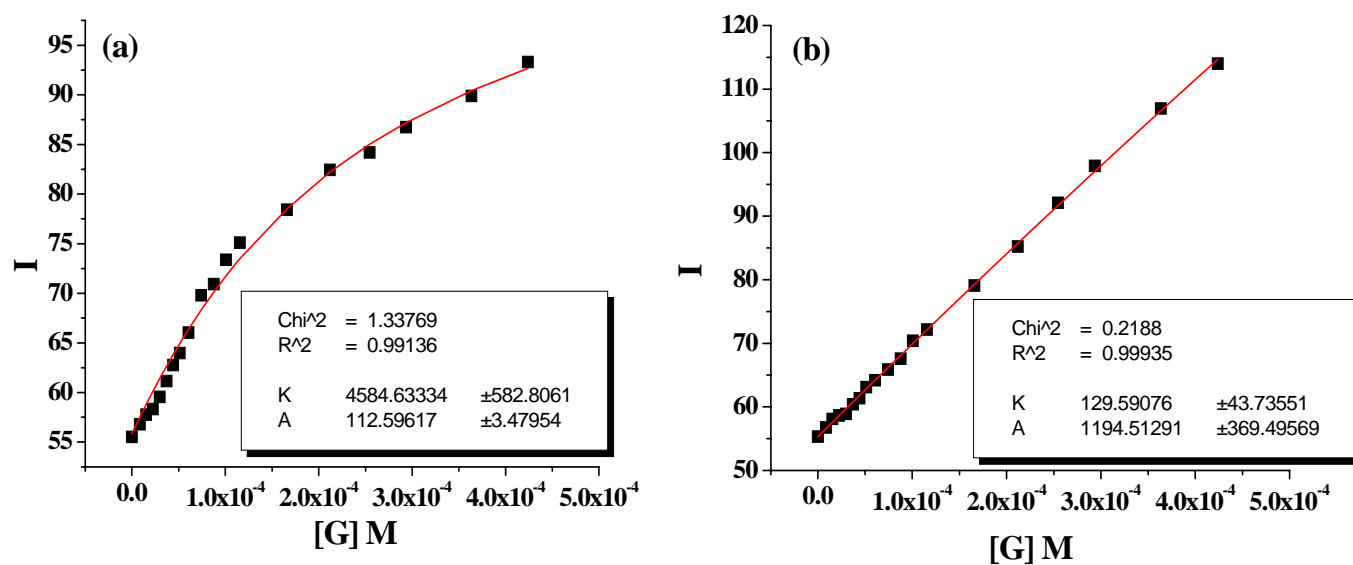

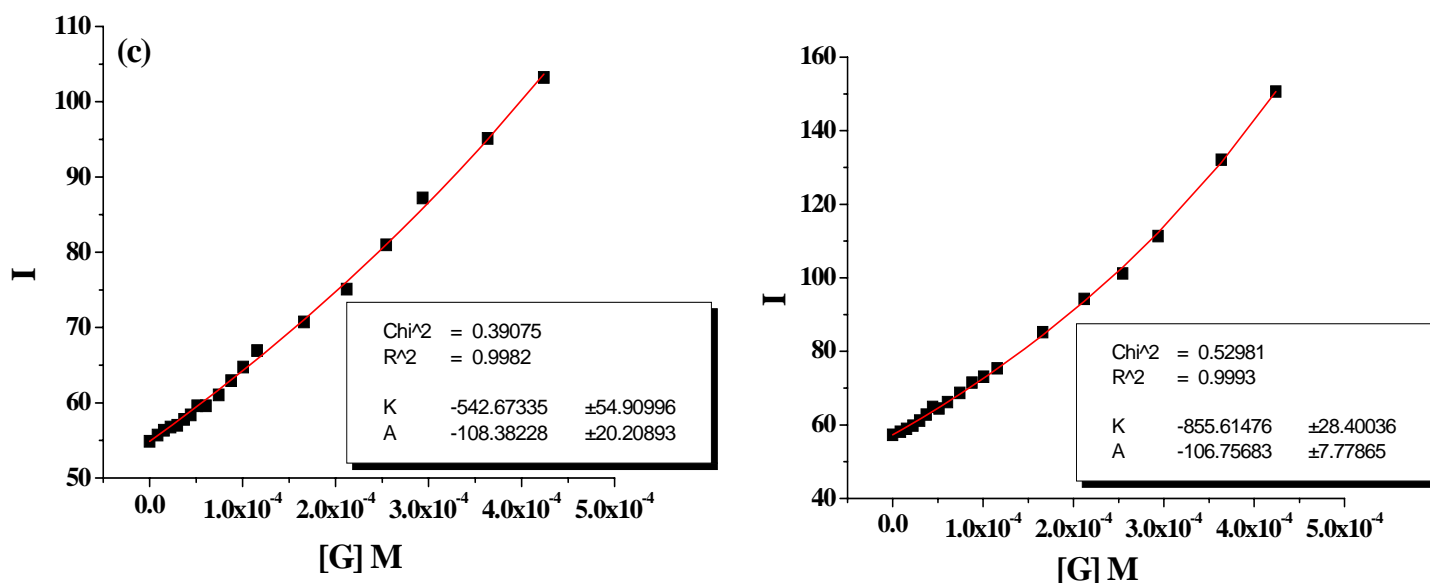

**Figure S7b:** Binding constant curves of receptor 4 with tetrabutylammonium salt of (a) Adipate, (b) Glutarate, (c) Malonate and (d) Succinate from fluorescence titration in CH<sub>3</sub>CN. Working formula

$I = (I_0 + I \times K \times C_G) / (1 + K \times C_G)$ ,  $I_0$  = initial intensity,  $I$  = intensity after successive addition of guest.  $C_G = [G]$ . ( $\lambda_{\max} = 412$  nm,  $[H] = 5.65 \times 10^{-5}$  M and  $[G] = 2.5 \times 10^{-3}$  M).

**9a. Emission titration curves for receptor 1-4 with sodium salt of H<sub>2</sub>PO<sub>4</sub><sup>-</sup>, HPO<sub>4</sub><sup>2-</sup>, PO<sub>4</sub><sup>3-</sup> in 4:1 (v/v) CH<sub>3</sub>CN:H<sub>2</sub>O containing 10 mM HEPES buffer (pH= 7.2) at 25 °C**

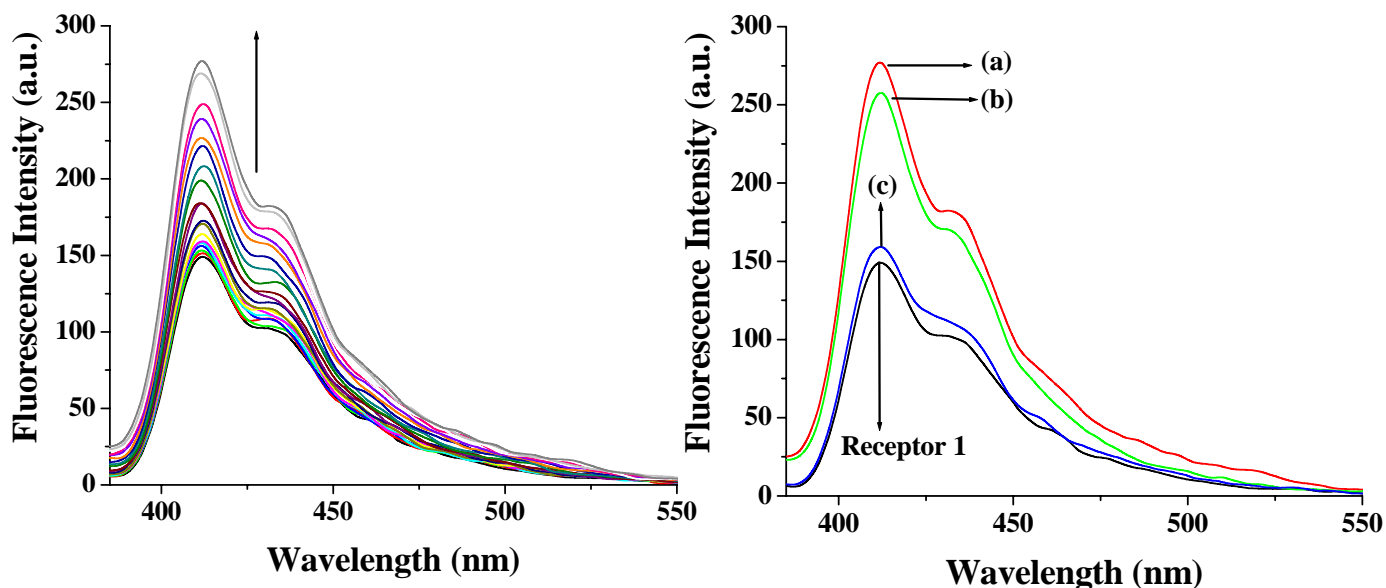

**Figure S8a:** Fluorescence titration of 1 (c = 2.01 x 10<sup>-5</sup> M) with addition of 50 equiv. amounts of NaH<sub>2</sub>PO<sub>4</sub> (c = 9.84 x 10<sup>-2</sup> M) in 4:1 (v/v) CH<sub>3</sub>CN:H<sub>2</sub>O containing 10 mM HEPES buffer (pH= 7.2).  $\lambda_{\text{Excitation}} = 380$  nm.

**Figure S8b:** Fluorescence emission change of 1 (c = 2.01 x 10<sup>-5</sup> M) with addition of 50 equiv. amounts of (a) NaH<sub>2</sub>PO<sub>4</sub>, (b) Na<sub>2</sub>HPO<sub>4</sub> and (c) Na<sub>3</sub>PO<sub>4</sub> in 4:1 (v/v) CH<sub>3</sub>CN:H<sub>2</sub>O containing 10 mM HEPES buffer (pH= 7.2).  $\lambda_{\text{Excitation}} = 380$  nm.

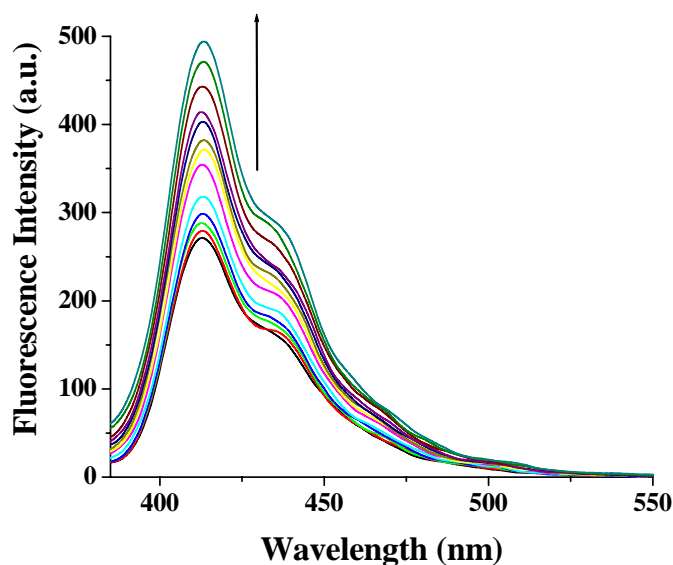

**Figure S8c:** Fluorescence titration of **3** ( $c = 2.01 \times 10^{-5} \text{M}$ ) with addition of 50 equiv. amounts of  $\text{Na}_2\text{HPO}_4$  ( $c = 9.84 \times 10^{-2} \text{M}$ ) in 4:1 (v/v)  $\text{CH}_3\text{CN}:\text{H}_2\text{O}$  containing 10 mM HEPES buffer (pH= 7.2).  $\lambda_{\text{Excitation}} = 380 \text{ nm}$ .

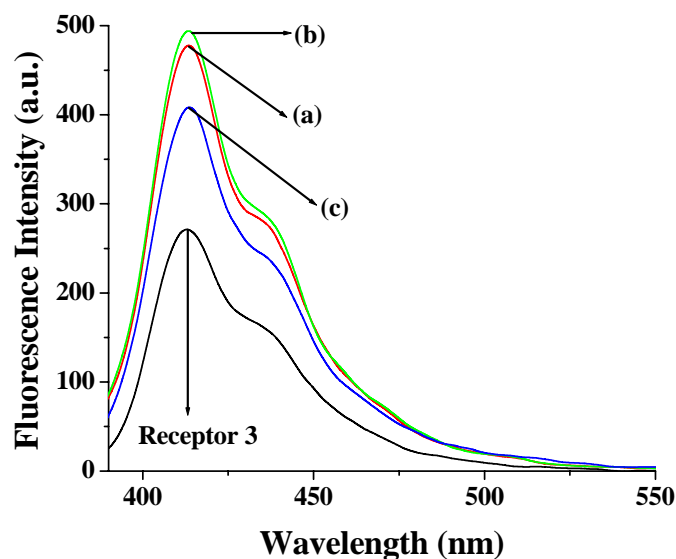

**Figure S8d:** Fluorescence emission change of **3** ( $c = 2.01 \times 10^{-5} \text{M}$ ) with addition of 50 equiv. amounts of (a)  $\text{NaH}_2\text{PO}_4$ , (b)  $\text{Na}_2\text{HPO}_4$  and (c)  $\text{Na}_3\text{PO}_4$  in 4:1 (v/v)  $\text{CH}_3\text{CN}:\text{H}_2\text{O}$  containing 10 mM HEPES buffer (pH= 7.2).  $\lambda_{\text{Excitation}} = 380 \text{ nm}$ .

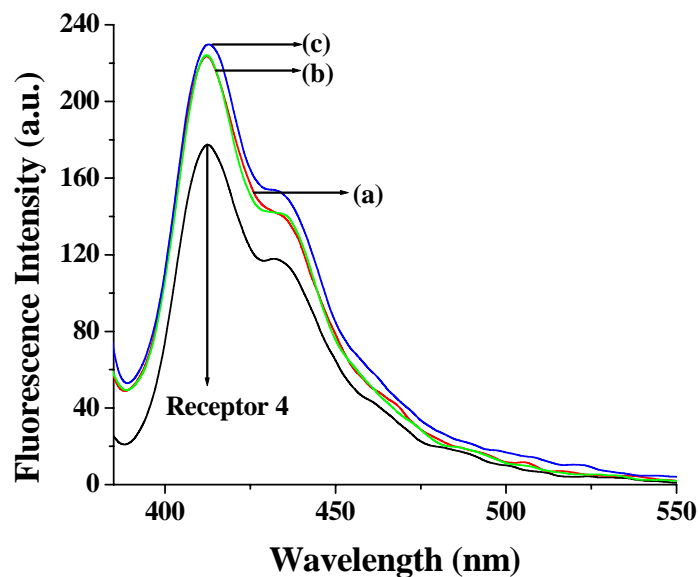

**Figure S8e:** Fluorescence emission change of **4** ( $c = 2.01 \times 10^{-5} \text{M}$ ) with addition of 50 equiv. amounts of (a)  $\text{NaH}_2\text{PO}_4$ , (b)  $\text{Na}_2\text{HPO}_4$  and (c)  $\text{Na}_3\text{PO}_4$  in 4:1 (v/v)  $\text{CH}_3\text{CN}:\text{H}_2\text{O}$  containing 10 mM HEPES buffer (pH= 7.2).  $\lambda_{\text{Excitation}} = 380 \text{ nm}$ .

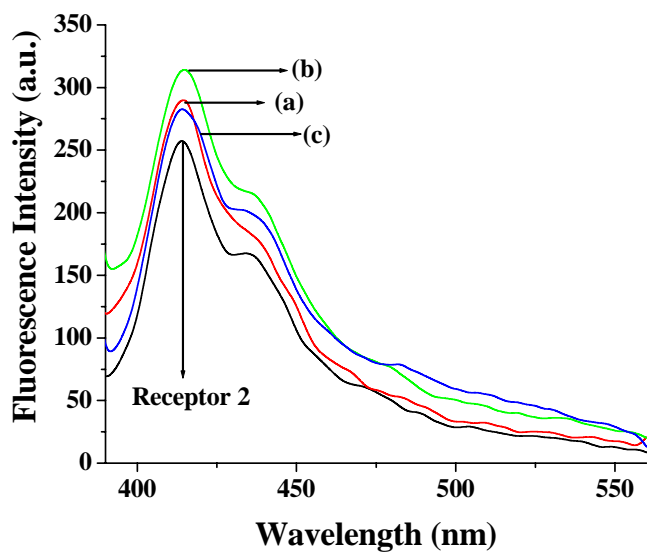

**Figure S8f:** Fluorescence emission change of **2** ( $c = 2.01 \times 10^{-5} \text{M}$ ) with addition of 50 equiv. amounts of (a)  $\text{NaH}_2\text{PO}_4$ , (b)  $\text{Na}_2\text{HPO}_4$  and (c)  $\text{Na}_3\text{PO}_4$  in 4:1 (v/v)  $\text{CH}_3\text{CN}:\text{H}_2\text{O}$  containing 10 mM HEPES buffer (pH= 7.2).  $\lambda_{\text{Excitation}} = 380 \text{ nm}$ .

**9b. UV-vis titration curves for receptor 1-4 with sodium salt of  $\text{H}_2\text{PO}_4^-$  and  $\text{HPO}_4^{2-}$  in 4:1 (v/v)  $\text{CH}_3\text{CN}:\text{H}_2\text{O}$  containing 10 mM HEPES buffer (pH= 7.2) at 25 °C**

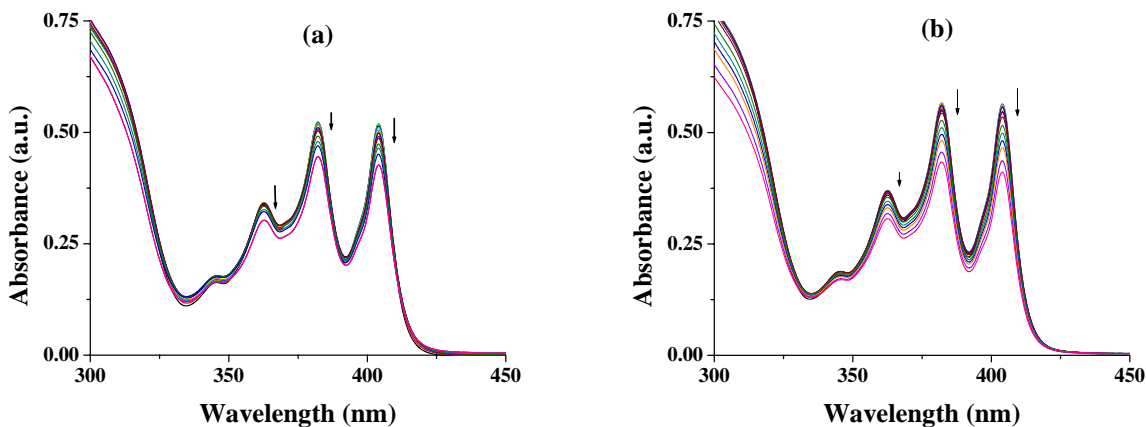

**Figure S8g:** UV-vis titration of **1** ( $c = 2.01 \times 10^{-5} \text{ M}$ ) with addition of 50 equiv. amounts of (a)  $\text{NaH}_2\text{PO}_4$  ( $c = 9.84 \times 10^{-2} \text{ M}$ ) and (b)  $\text{Na}_2\text{HPO}_4$  ( $c = 9.84 \times 10^{-2} \text{ M}$ ) in 4:1 (v/v)  $\text{CH}_3\text{CN}:\text{H}_2\text{O}$  containing 10 mM HEPES buffer (pH= 7.2).  $\lambda_{\text{Max}} = 380 \text{ nm}$ .

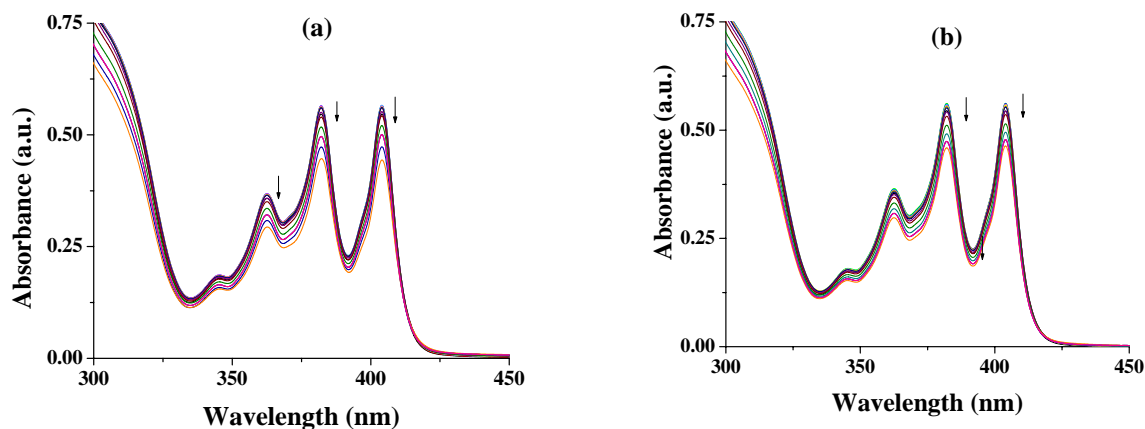

**Figure S8h:** UV-vis titration of **2** ( $c = 2.01 \times 10^{-5} \text{ M}$ ) with addition of 50 equiv. amounts of (a)  $\text{NaH}_2\text{PO}_4$  ( $c = 9.84 \times 10^{-2} \text{ M}$ ) and (b)  $\text{Na}_2\text{HPO}_4$  ( $c = 9.84 \times 10^{-2} \text{ M}$ ) in 4:1 (v/v)  $\text{CH}_3\text{CN}:\text{H}_2\text{O}$  containing 10 mM HEPES buffer (pH= 7.2).  $\lambda_{\text{Max}} = 380 \text{ nm}$ .

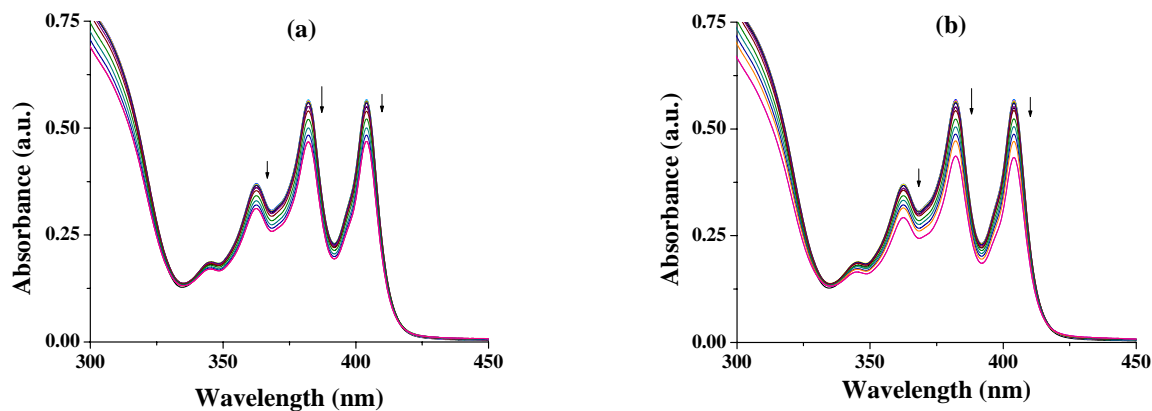

**Figure S8i:** UV-vis titration of **3** ( $c = 2.01 \times 10^{-5} \text{ M}$ ) with addition of 50 equiv. amounts of (a)  $\text{NaH}_2\text{PO}_4$  ( $c = 9.84 \times 10^{-2} \text{ M}$ ) and (b)  $\text{Na}_2\text{HPO}_4$  ( $c = 9.84 \times 10^{-2} \text{ M}$ ) in 4:1 (v/v)  $\text{CH}_3\text{CN}:\text{H}_2\text{O}$  containing 10 mM HEPES buffer (pH= 7.2).  $\lambda_{\text{Max}} = 380 \text{ nm}$ .



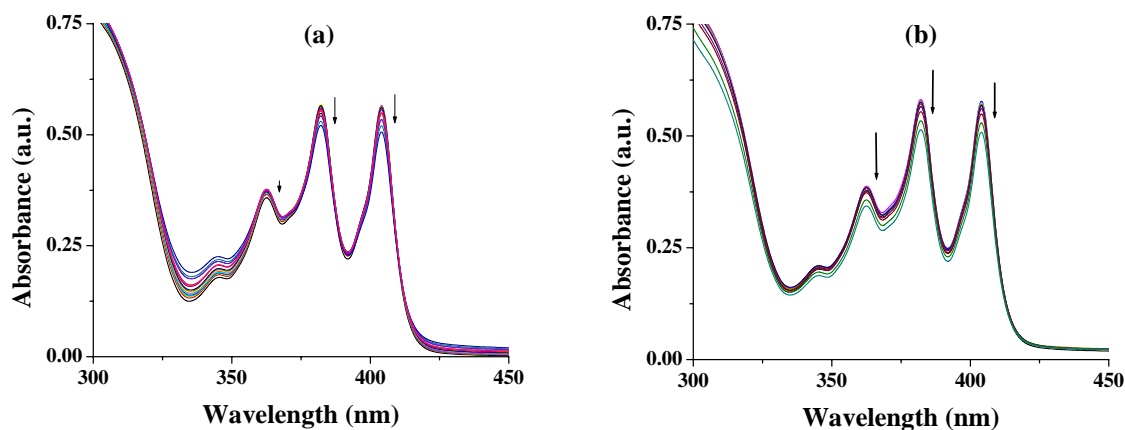

**Figure S8j:** UV-vis titration of **4** ( $c = 2.01 \times 10^{-5}$  M) with addition of 50 equiv. amounts of (a) NaH<sub>2</sub>PO<sub>4</sub> ( $c = 9.84 \times 10^{-2}$  M) and (b) Na<sub>2</sub>HPO<sub>4</sub> ( $c = 9.84 \times 10^{-2}$  M) in 4:1 (v/v) CH<sub>3</sub>CN:H<sub>2</sub>O containing 10 mM HEPES buffer (pH= 7.2).  $\lambda_{\text{Max}} = 380$  nm.

### 10. Anion binding studies of receptors **1** – **4** with sodium salt of H<sub>2</sub>PO<sub>4</sub><sup>-</sup>, HPO<sub>4</sub><sup>2-</sup> and PO<sub>4</sub><sup>3-</sup> in CH<sub>3</sub>CN:H<sub>2</sub>O (4:1, v/v)

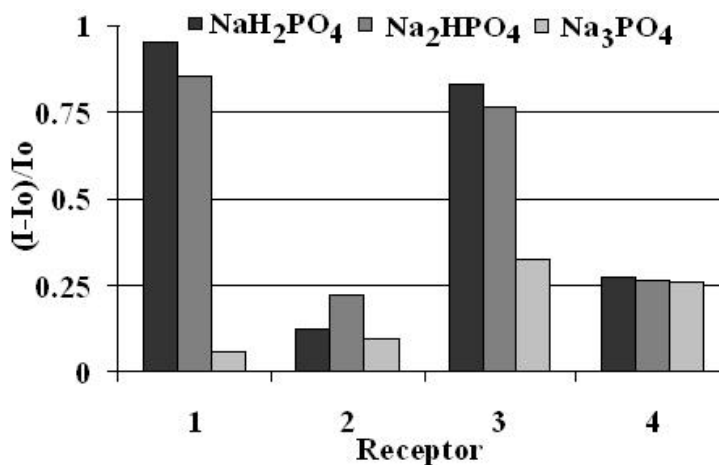

**Figure S8k.** Fluorescence ratio  $[(I-I_0)/I_0]$  of receptors **1** – **4** in CH<sub>3</sub>CN: H<sub>2</sub>O (4:1 v/v) at 412 nm upon addition of 50 equiv. amounts of a particular anion (dissolved in H<sub>2</sub>O).

**11. Binding constant curves for receptors 1 and 3 with  $\text{NaH}_2\text{PO}_4$  and  $\text{Na}_2\text{HPO}_4$  from fluorescence in 4:1 (v/v)  $\text{CH}_3\text{CN}:\text{H}_2\text{O}$  containing 10 mM HEPES buffer (pH= 7.2)**

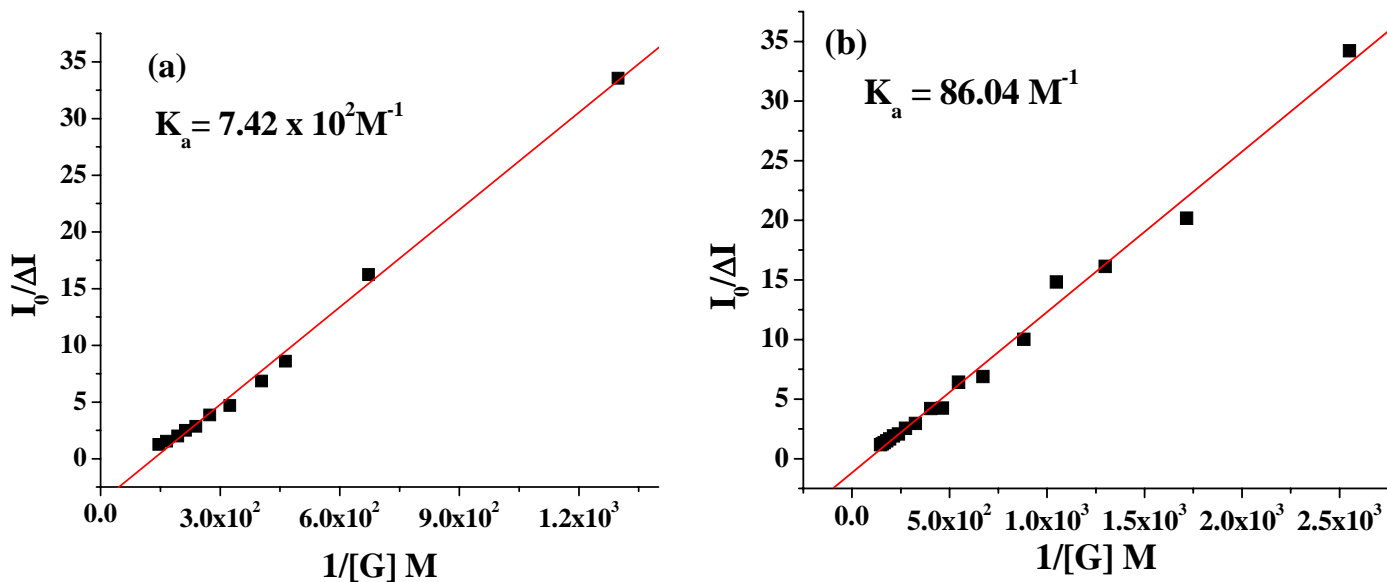

**Figure S9a :** Benesi–Hilderband plot for **1** ( $c = 2.01 \times 10^{-5} \text{ M}$ ) with (a)  $\text{NaH}_2\text{PO}_4^-$  and (b)  $\text{Na}_2\text{HPO}_4$  at 412 nm.

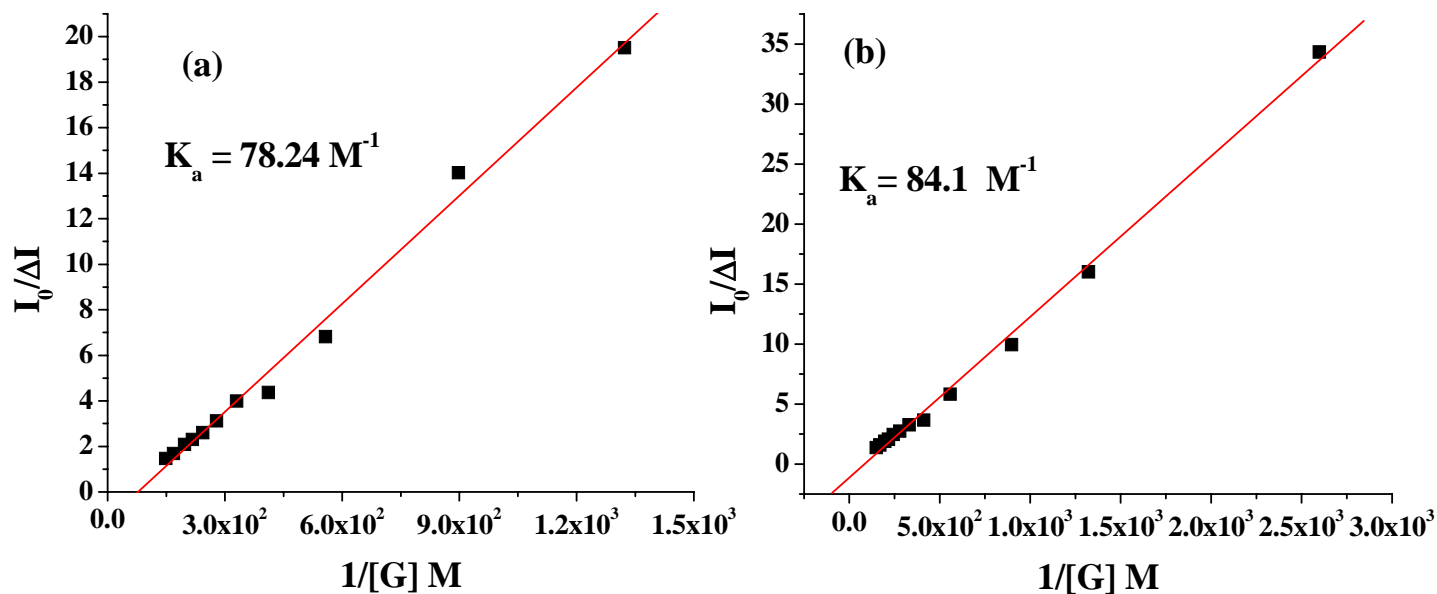

**Figure S9b:** Benesi–Hilderband plot for **3** ( $c = 2.01 \times 10^{-5} \text{ M}$ ) with (a)  $\text{NaH}_2\text{PO}_4^-$  and (b)  $\text{Na}_2\text{HPO}_4$  at 412 nm.

## 12. ROESY spectrum in $d_6$ -DMSO of receptors 1-4

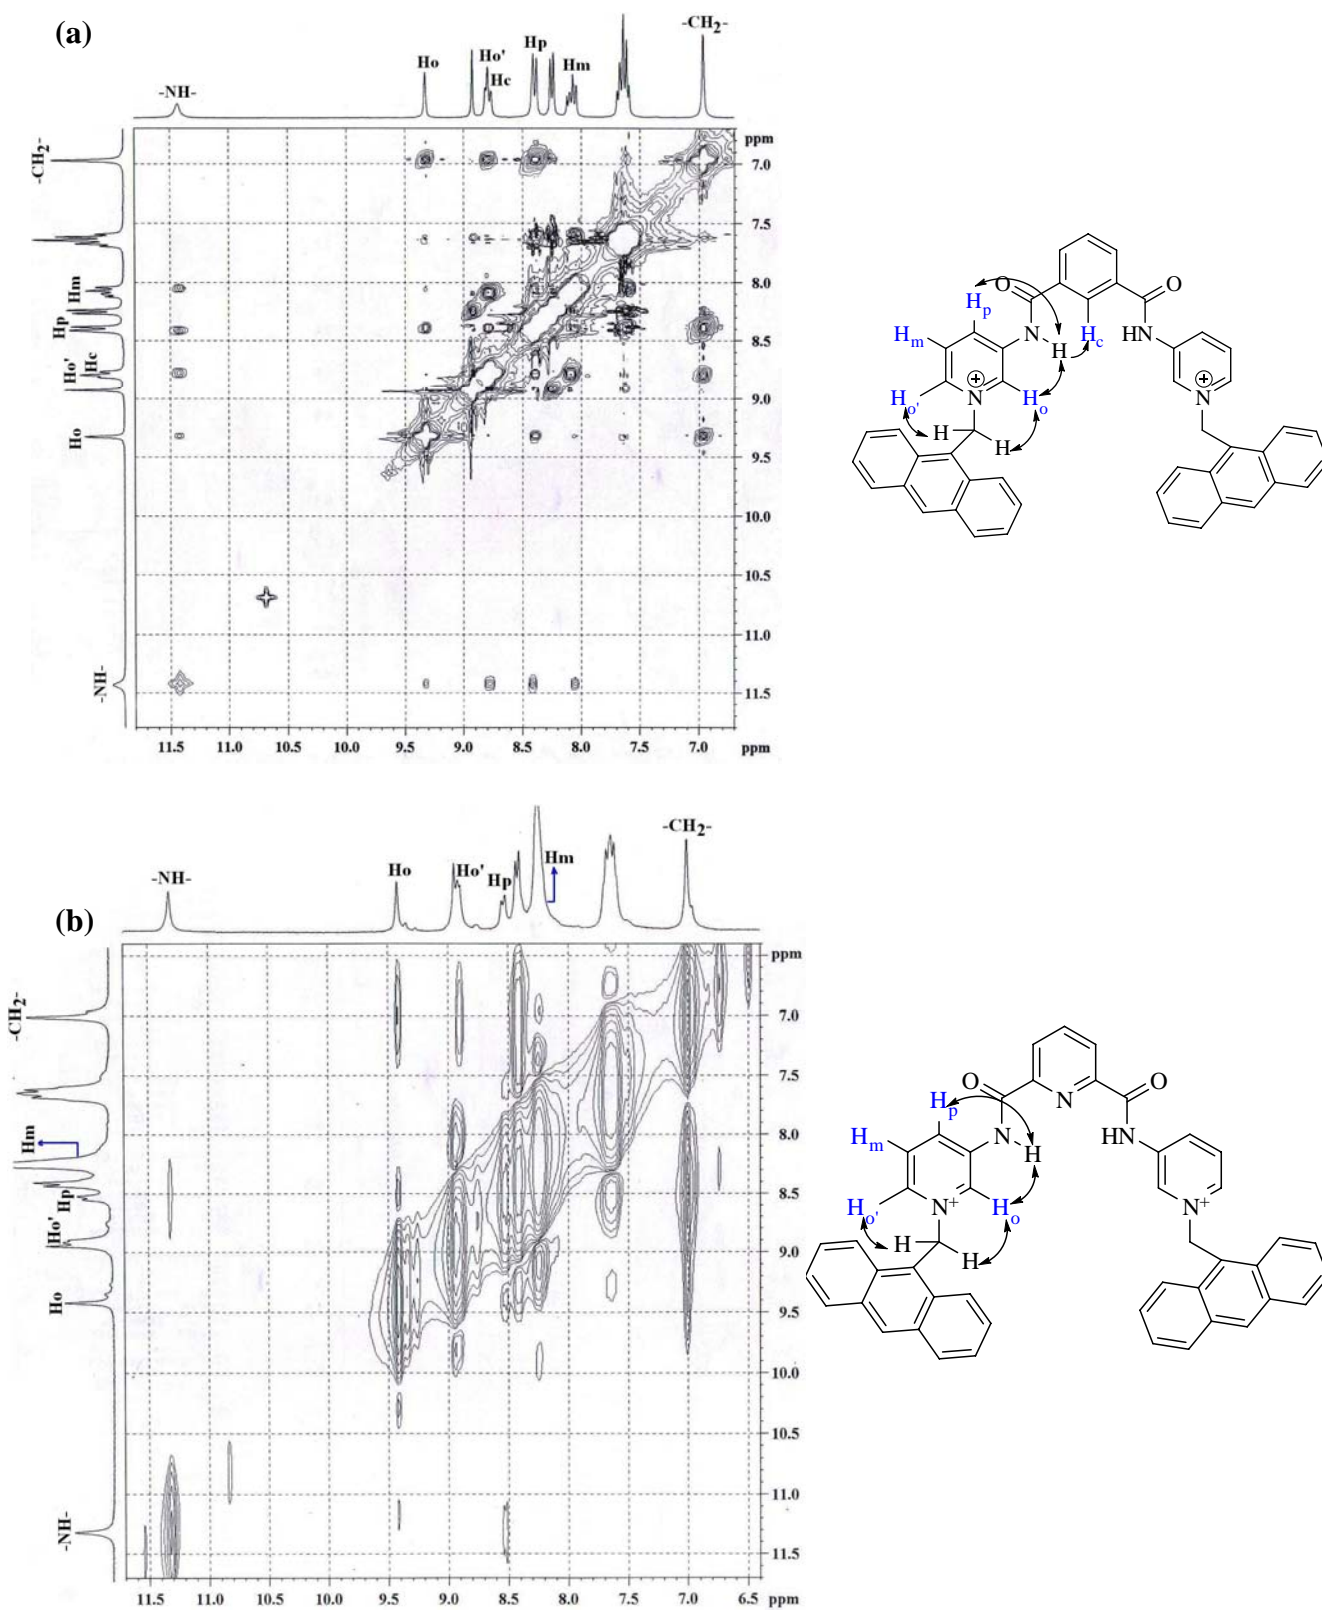

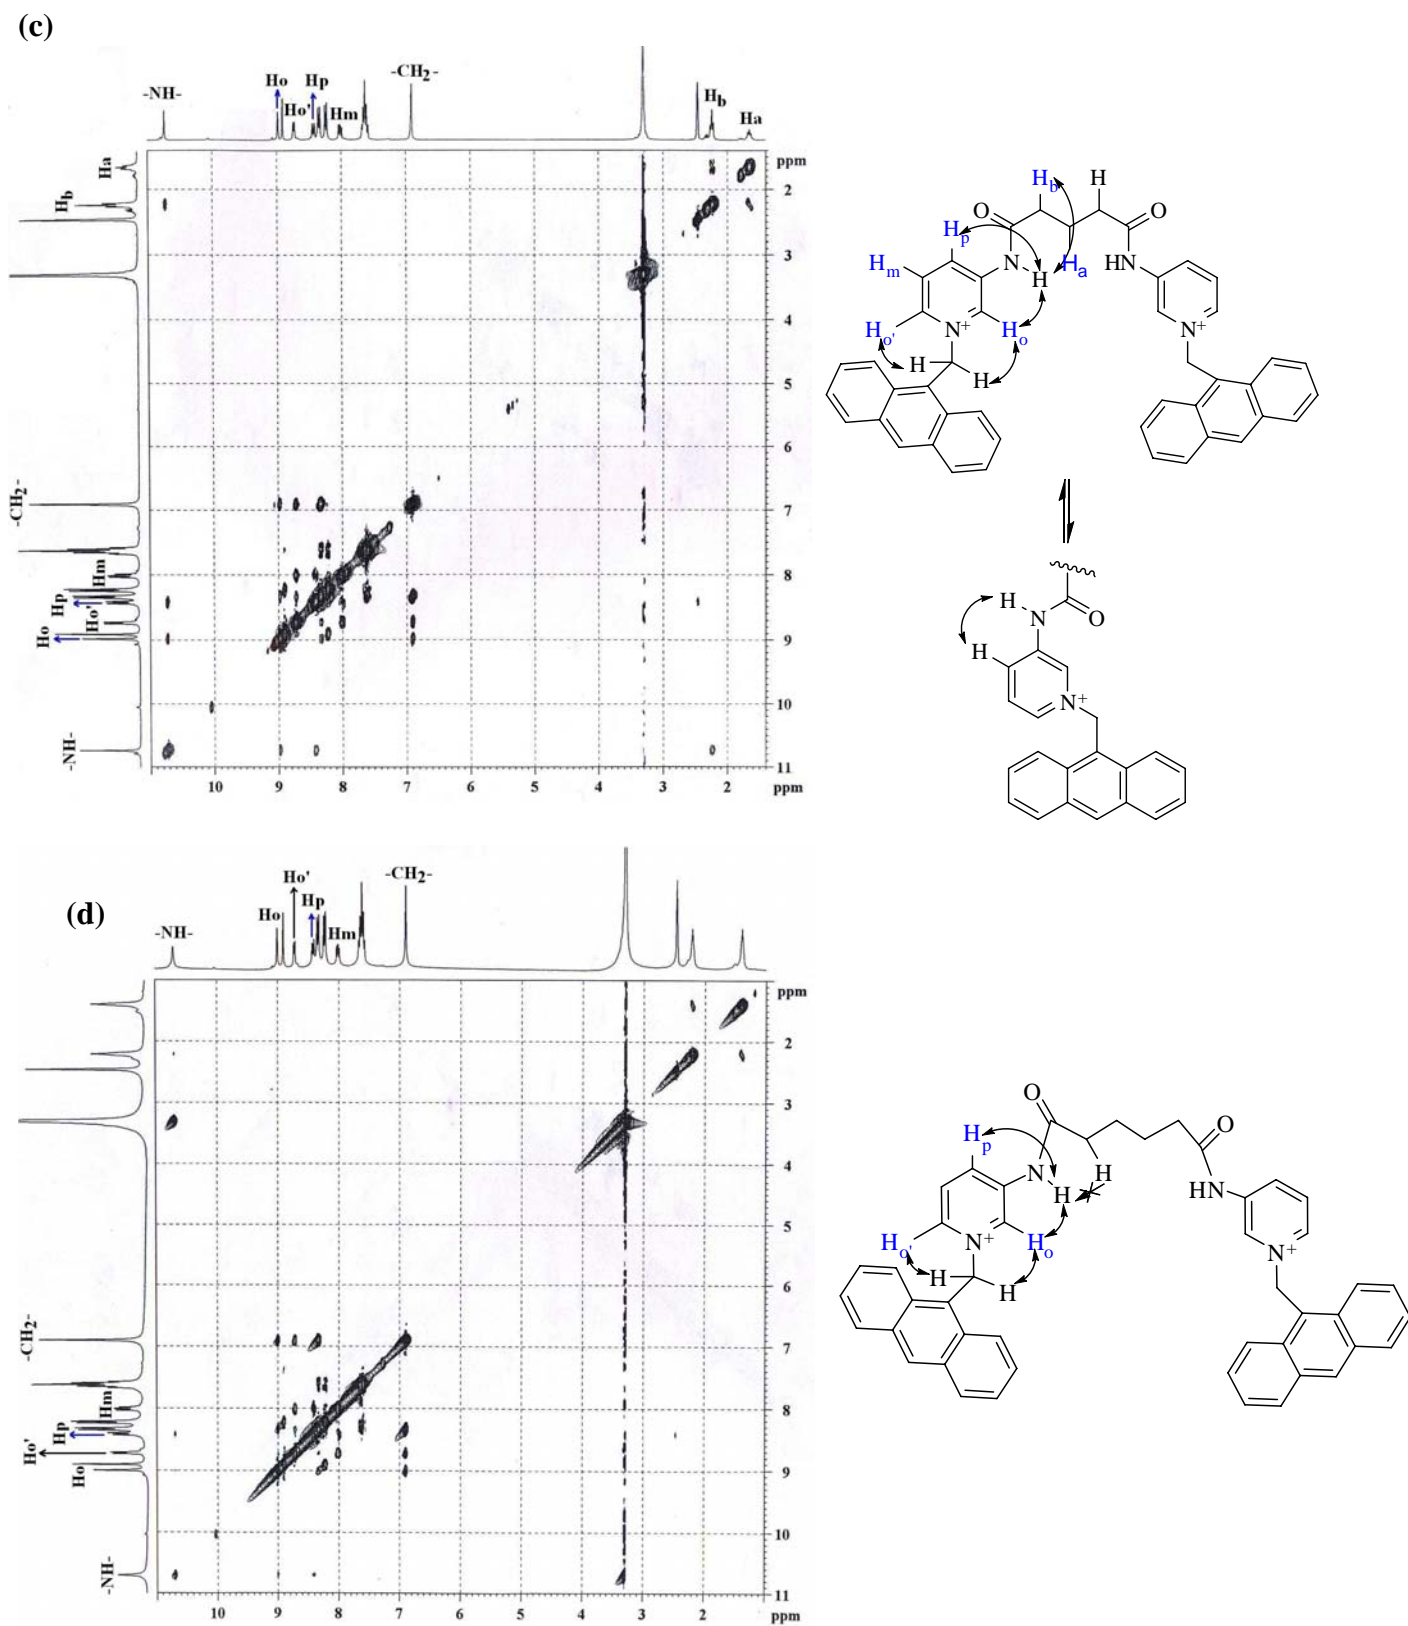

Figure S10. ROSEY spectrum of receptors (a) 1, (b) 2, (c) 3 and (d) 4 in  $d_6$ -DMSO.

**13a.  $^1\text{H}$  NMR of the receptors 2 – 4 itself and in presence of equiv. amount of  $\text{F}^-$ ,  $\text{AcO}^-$  and  $\text{H}_2\text{PO}_4^-$  in  $\text{CDCl}_3$  containing 6%  $d_6$ -DMSO**

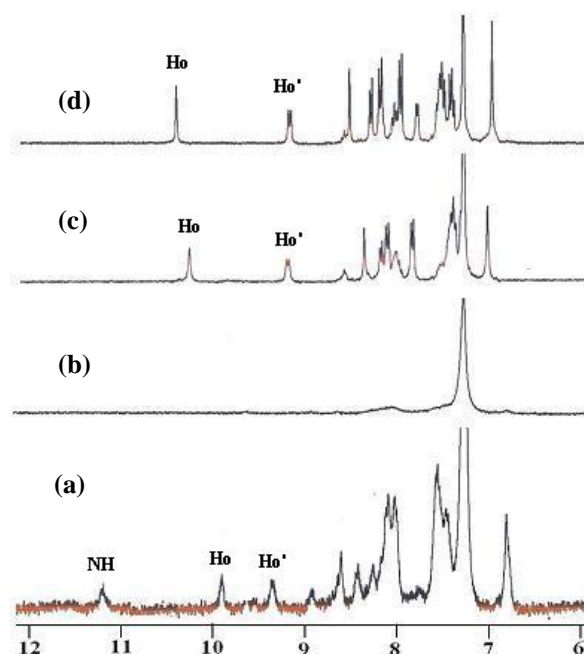

**Figure S11a.** Partial  $^1\text{H}$  NMR of (a) receptor **2** ( $c = 2.64 \times 10^{-3}$  M) and with equiv. amount of (b)  $\text{H}_2\text{PO}_4^- \text{N}^+\text{Bu}_4$ , (c)  $\text{FN}^+\text{Bu}_4$ , (d)  $\text{AcO}^- \text{N}^+\text{Bu}_4$  in  $\text{CDCl}_3$  containing 6%  $d_6$ -DMSO.

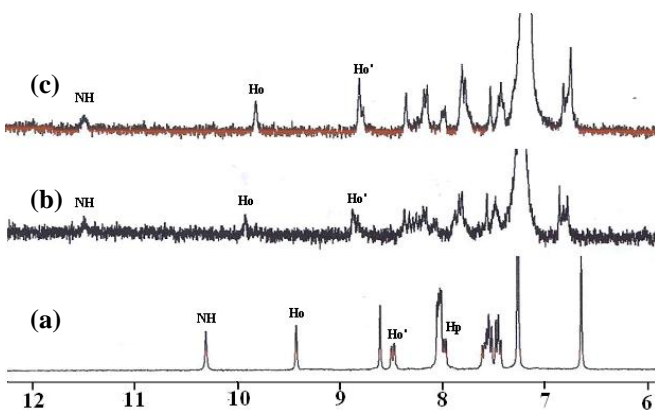

**Figure S11b.** Partial  $^1\text{H}$  NMR of (a) receptor **3** ( $c = 2.64 \times 10^{-3}$  M) and with (b) 1 equiv. amount of  $\text{H}_2\text{PO}_4^- \text{N}^+\text{Bu}_4$ , (c) 2 equiv. amount of  $\text{H}_2\text{PO}_4^- \text{N}^+\text{Bu}_4$  in  $\text{CDCl}_3$  containing 6%  $d_6$ -DMSO.

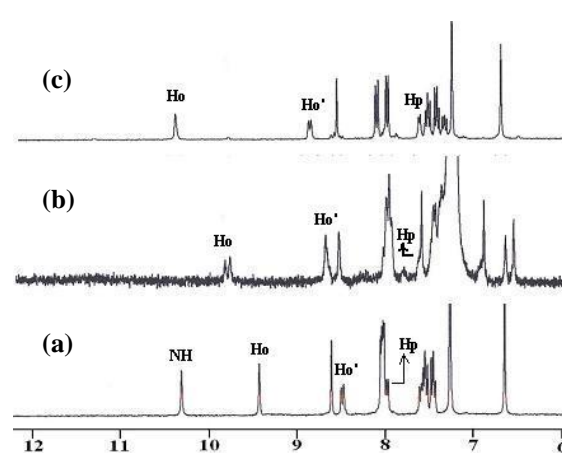

**Figure S11c.** Partial  $^1\text{H}$  NMR of receptor **3** ( $c = 2.64 \times 10^{-3}$  M) and with tetrabutylammonium salts of (b)  $\text{F}^-$  (1:1), (c)  $\text{AcO}^-$  (1:1) in  $\text{CDCl}_3$  containing 6%  $d_6$ -DMSO.

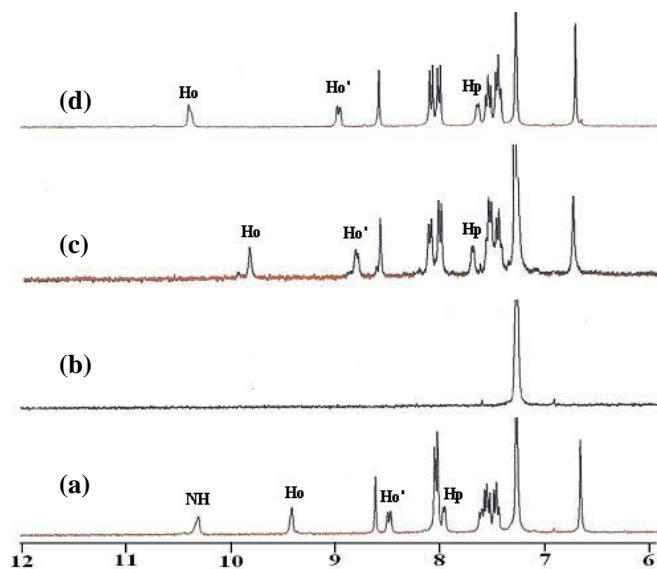

**Figure S11d.** Partial  $^1\text{H}$  NMR of (a) receptor **4** ( $c = 2.64 \times 10^{-3}$  M) and with tetrabutylammonium salts of (b)  $\text{H}_2\text{PO}_4^-$  (1:1), (c)  $\text{F}^-$  (1:1), (d)  $\text{AcO}^-$  (1:1) in  $\text{CDCl}_3$  containing 6%  $d_6$ -DMSO.

### 13b. $^1\text{H}$ NMR titration spectra (partial) of the receptors **3** – **4** and in presence of glutarate and adipate in $\text{CDCl}_3$ containing 6% $d_6$ -DMSO

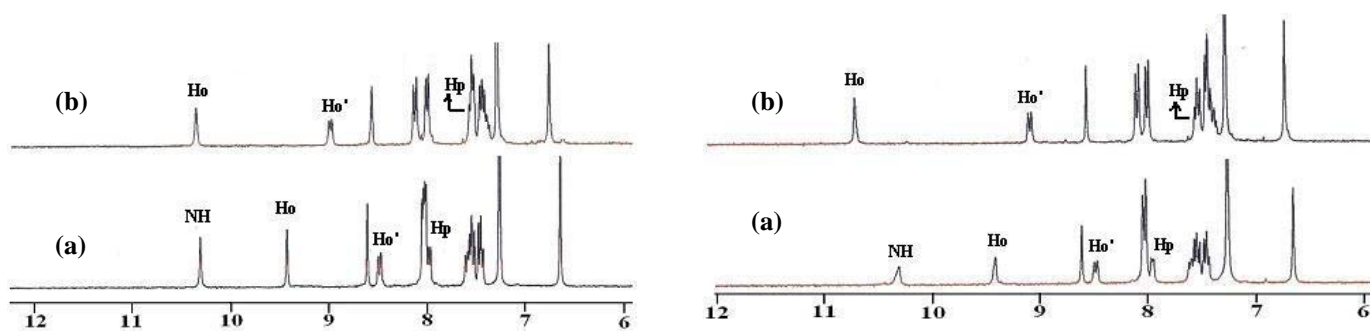

**Figure S11e.** (a) Partial  $^1\text{H}$  NMR spectrum of receptor **3** ( $c = 2.64 \times 10^{-3}$  M) only, with tetrabutylammonium (b) Glutarate (1:1) in  $\text{CDCl}_3$  containing 6%  $d_6$ -DMSO.

**Figure S11f.** (a) Partial  $^1\text{H}$  NMR spectrum of receptor **4** ( $c = 2.64 \times 10^{-3}$  M) only, with tetrabutylammonium (b) Adipate (1:1) in  $\text{CDCl}_3$  containing 6%  $d_6$ -DMSO.

14.  $^{31}\text{P}$  of  $\text{H}_2\text{PO}_4^-$  in the presence of 1-4 in  $d_6$ -DMSO (Brucker 500 MHz).

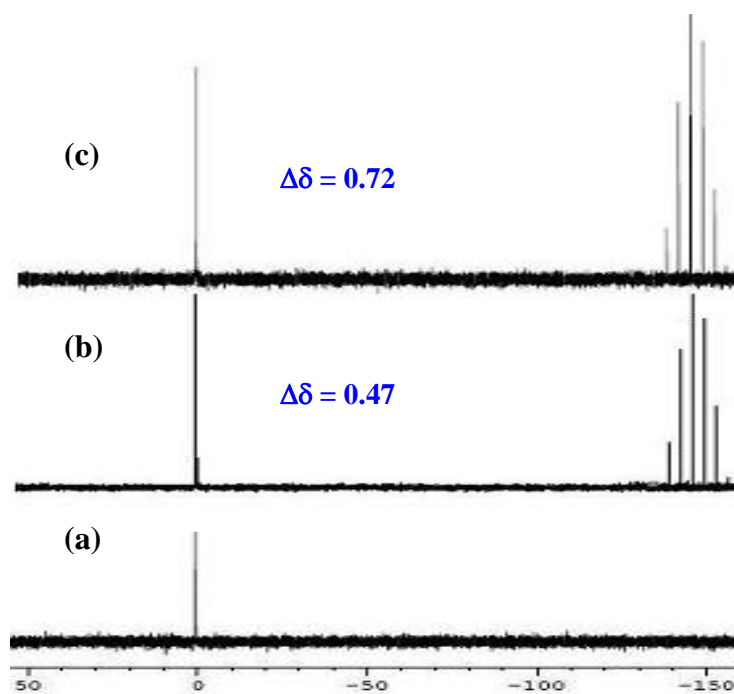

**Figure S12a.**  $^{31}\text{P}$  NMR (500 MHz, in  $d_6$ -DMSO) of (a)  $\text{H}_2\text{PO}_4^-$  ( $c = 8.66 \times 10^{-3}$  M), (b)  $1.\text{H}_2\text{PO}_4^-$  (1:1) and (c)  $1.\text{H}_2\text{PO}_4^-$  (1:2).

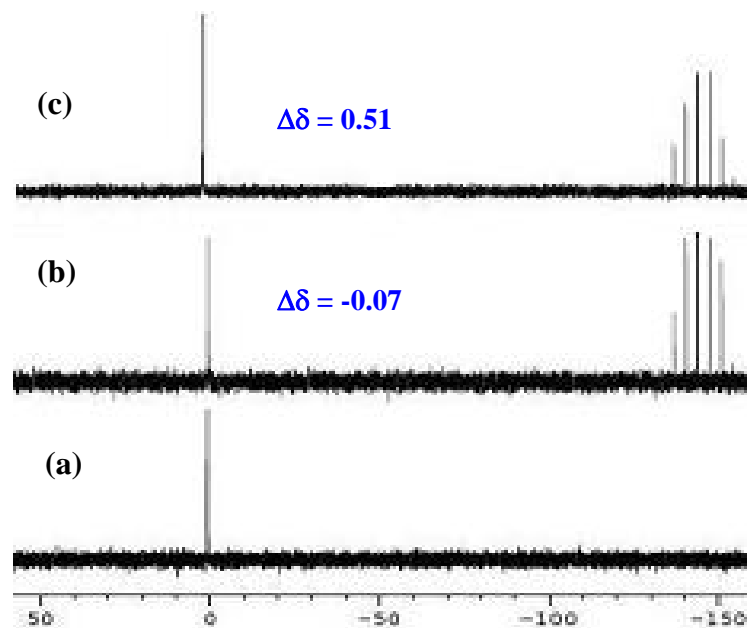

**Figure S12b.**  $^{31}\text{P}$  NMR (500 MHz, in  $d_6$ -DMSO) of (a)  $\text{H}_2\text{PO}_4^-$  ( $c = 8.66 \times 10^{-3}$  M), (b)  $2.\text{H}_2\text{PO}_4^-$  (1:1) and (c)  $2.\text{H}_2\text{PO}_4^-$  (1:2).

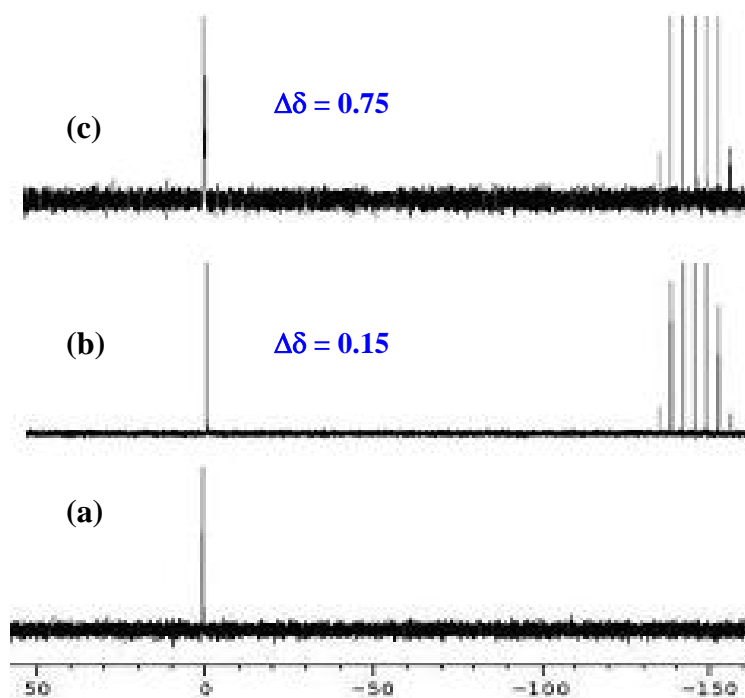

**Figure S12c.**  $^{31}\text{P}$  NMR (500 MHz, in  $d_6$ -DMSO) of (a)  $\text{H}_2\text{PO}_4^-$  ( $c = 8.66 \times 10^{-3}$  M), (b)  $3\text{H}_2\text{PO}_4^-$  (1:1) and (c)  $3\text{H}_2\text{PO}_4^-$  (1:2).

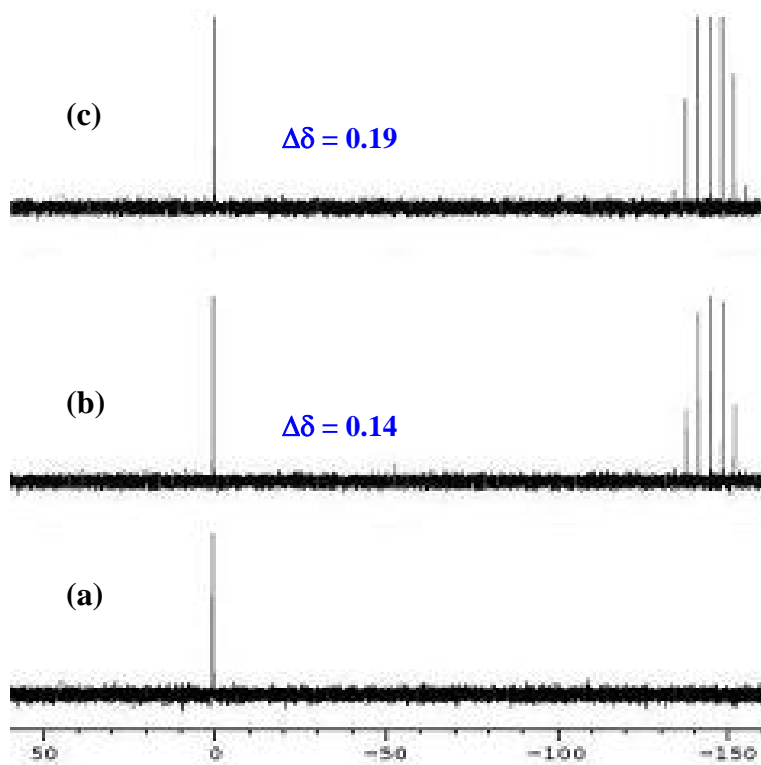

**Figure S12d.**  $^{31}\text{P}$  NMR (500 MHz, in  $d_6$ -DMSO) of (a)  $\text{H}_2\text{PO}_4^-$  ( $c = 8.66 \times 10^{-3}$  M), (b)  $4\text{H}_2\text{PO}_4^-$  (1:1) and (c)  $4\text{H}_2\text{PO}_4^-$  (1:2).



**15. The distribution of the MO's of the receptors (1-4) itself and in their complexes with  $\text{H}_2\text{PO}_4^-$  ([G]/ [H] = 1:1)**

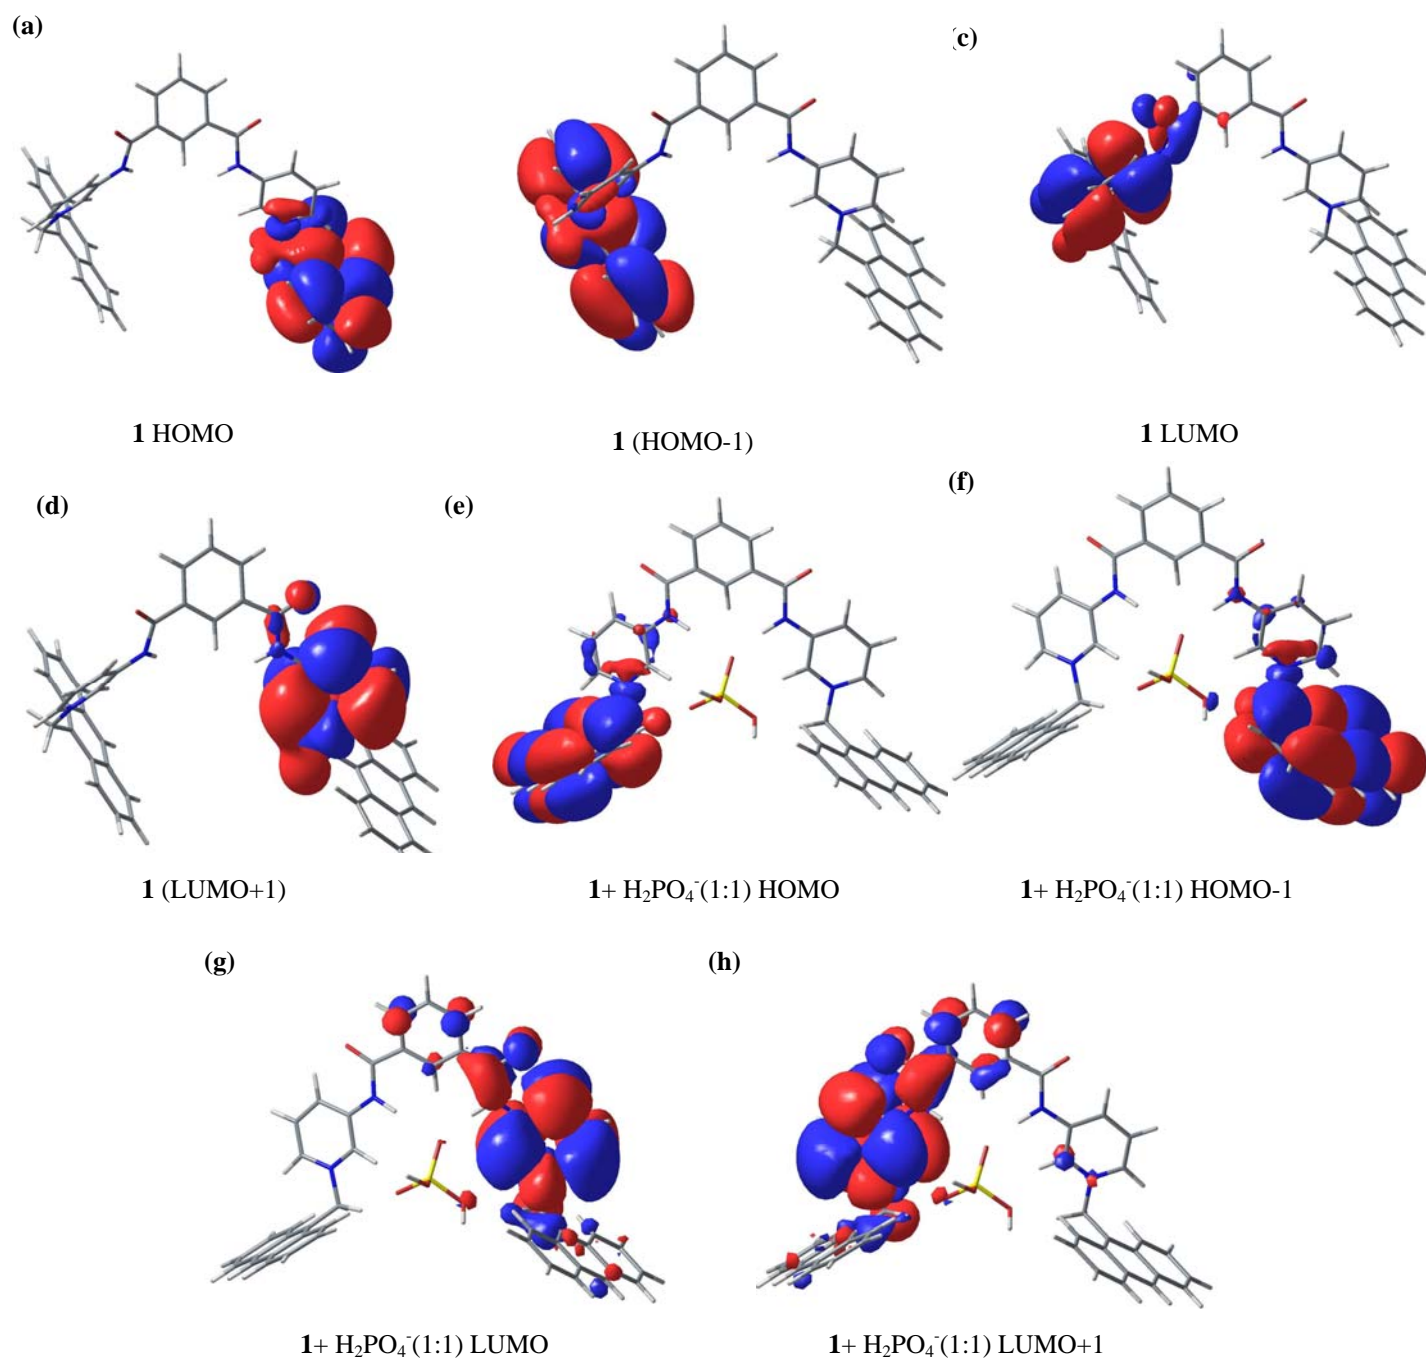

**Figure S13a.** MO picture of receptor **1** and 1:1 complex with  $\text{H}_2\text{PO}_4^-$ .

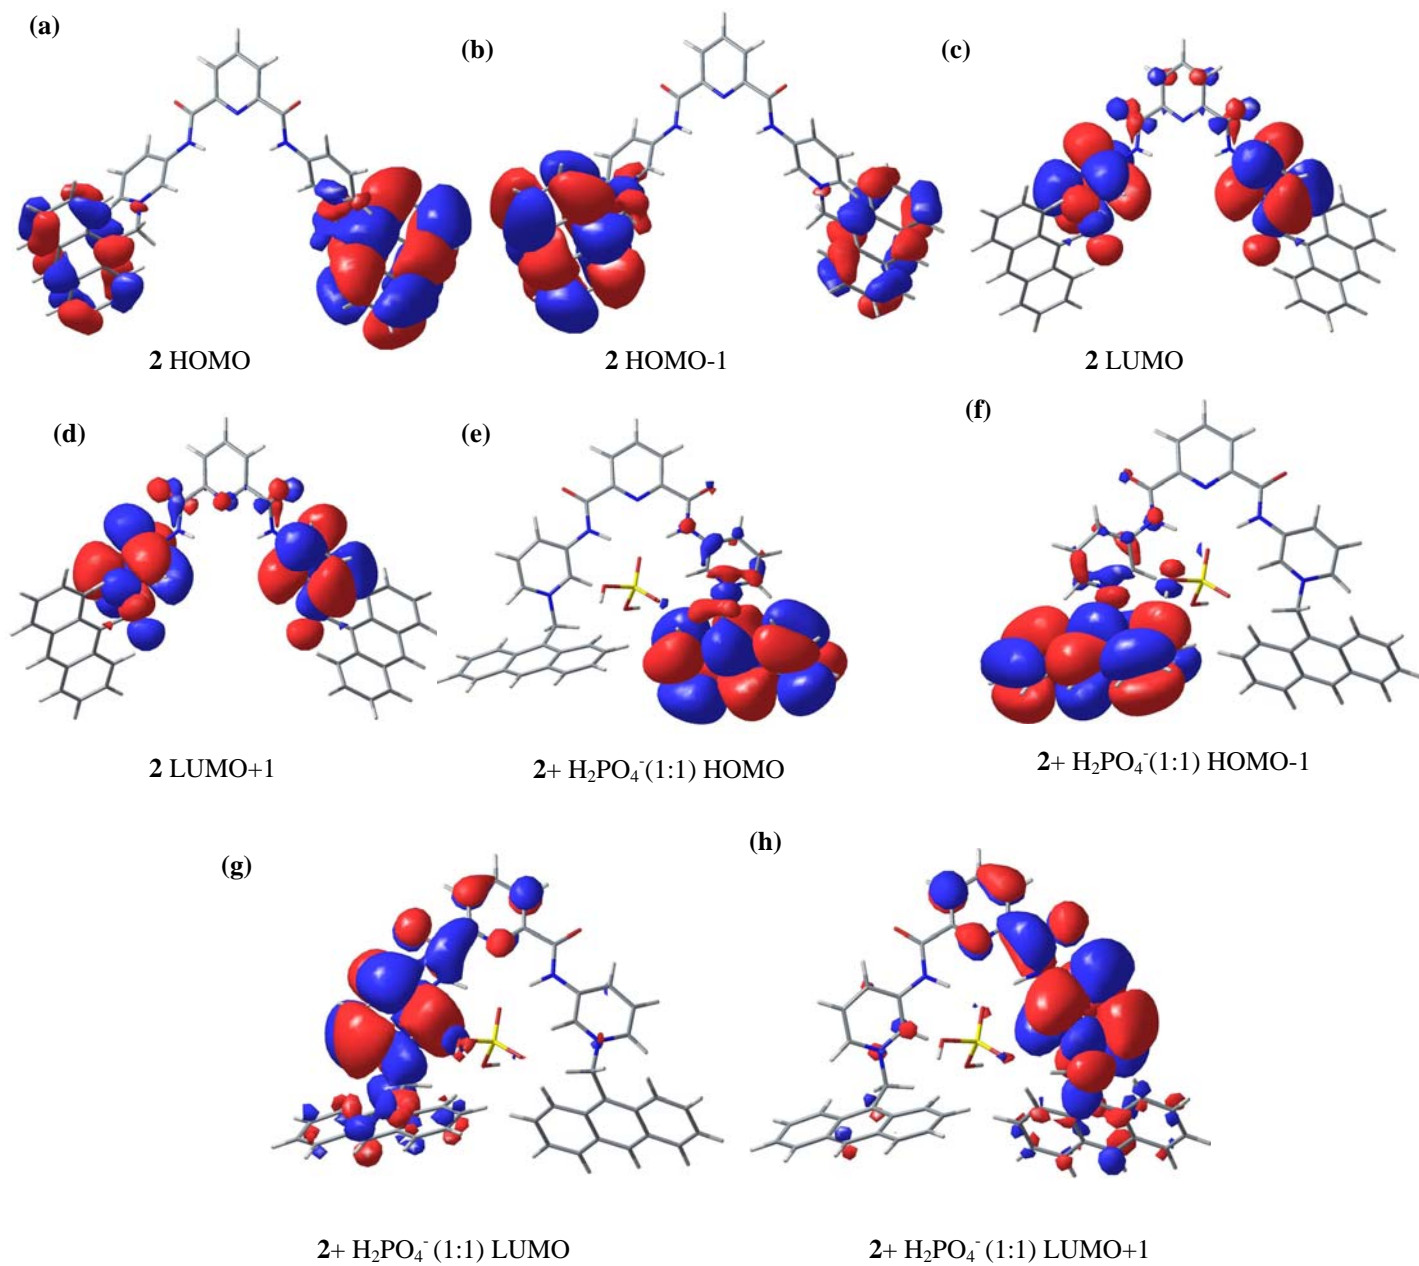

**Figure S13b.** MO picture of receptor **2** and 1:1 complex with  $\text{H}_2\text{PO}_4^-$ .

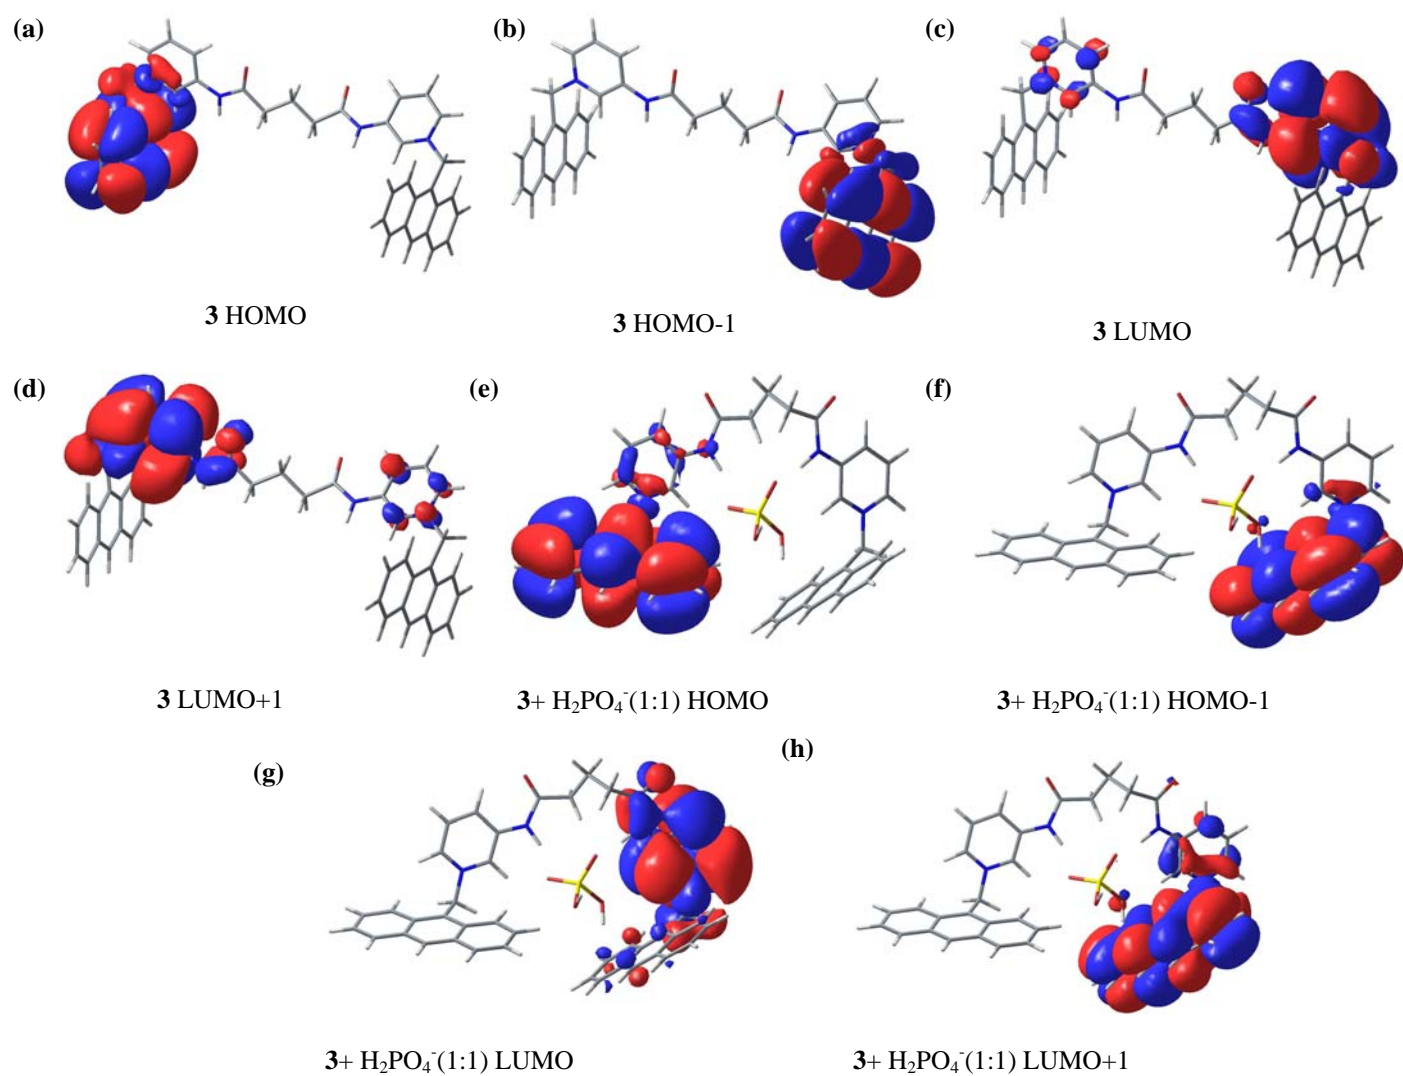

**Figure S13c.** MO picture of receptor **3** and 1:1 complex with  $\text{H}_2\text{PO}_4^-$ .

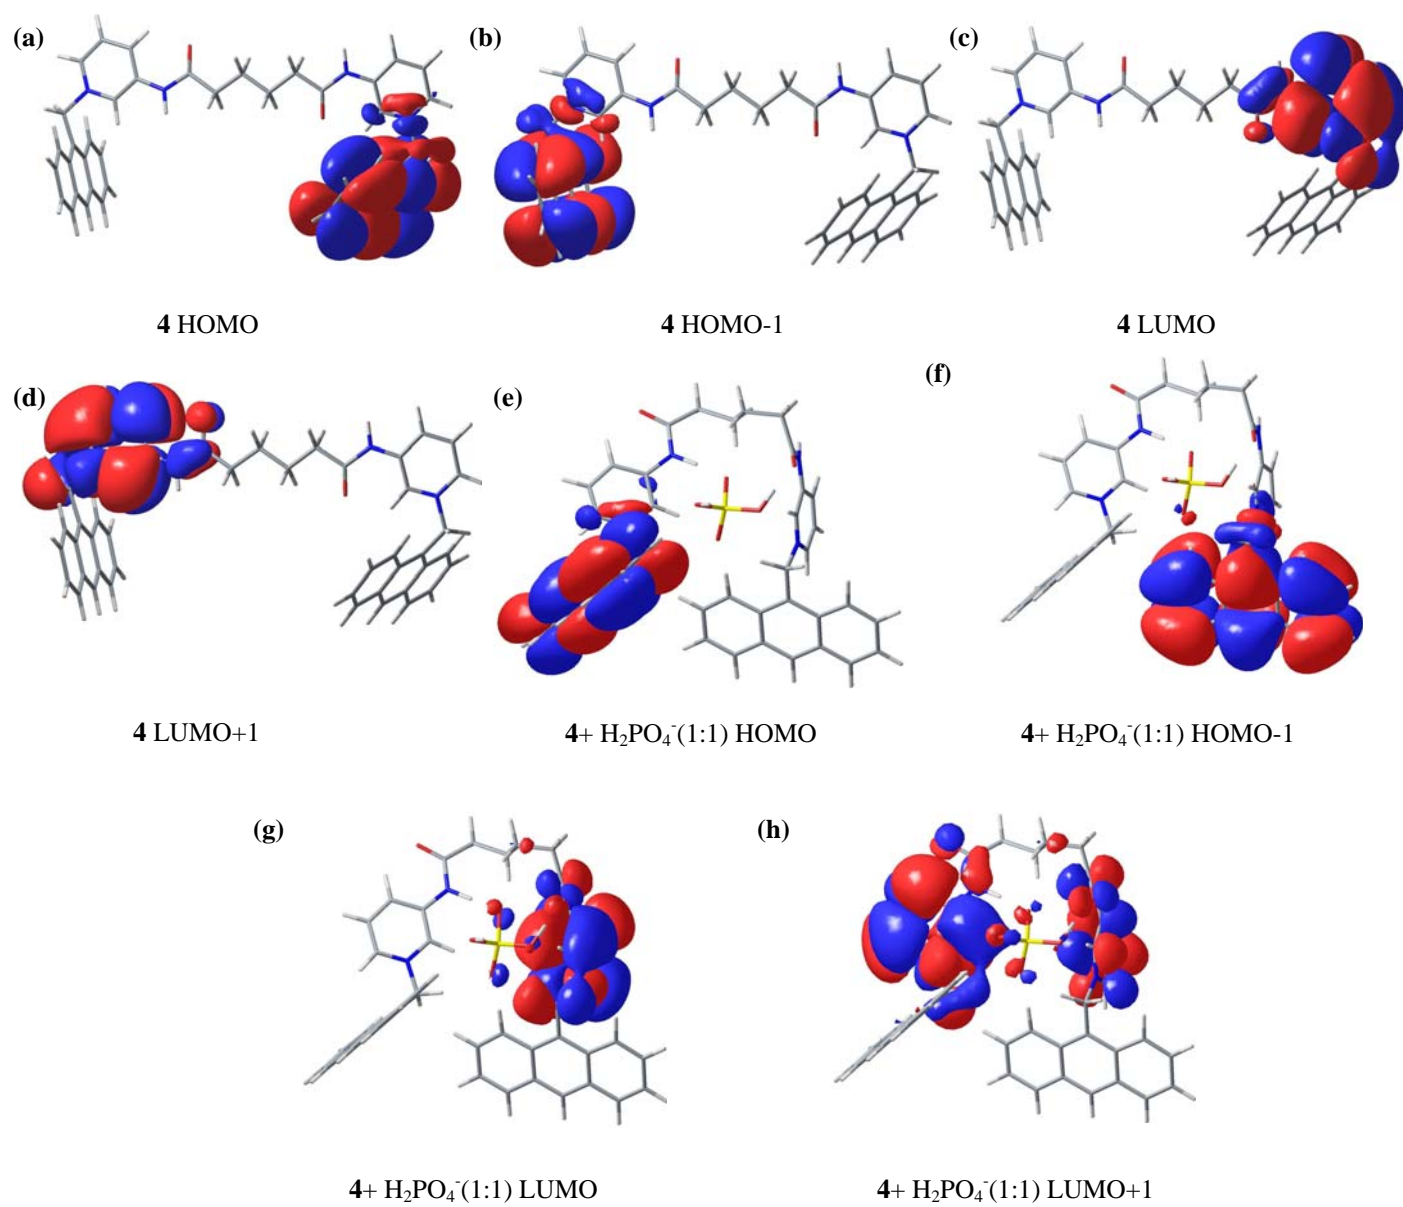

**Figure S13d.** MO picture of receptor **4** and 1:1 complex with  $\text{H}_2\text{PO}_4^-$ .

## 16. Cell Staining.

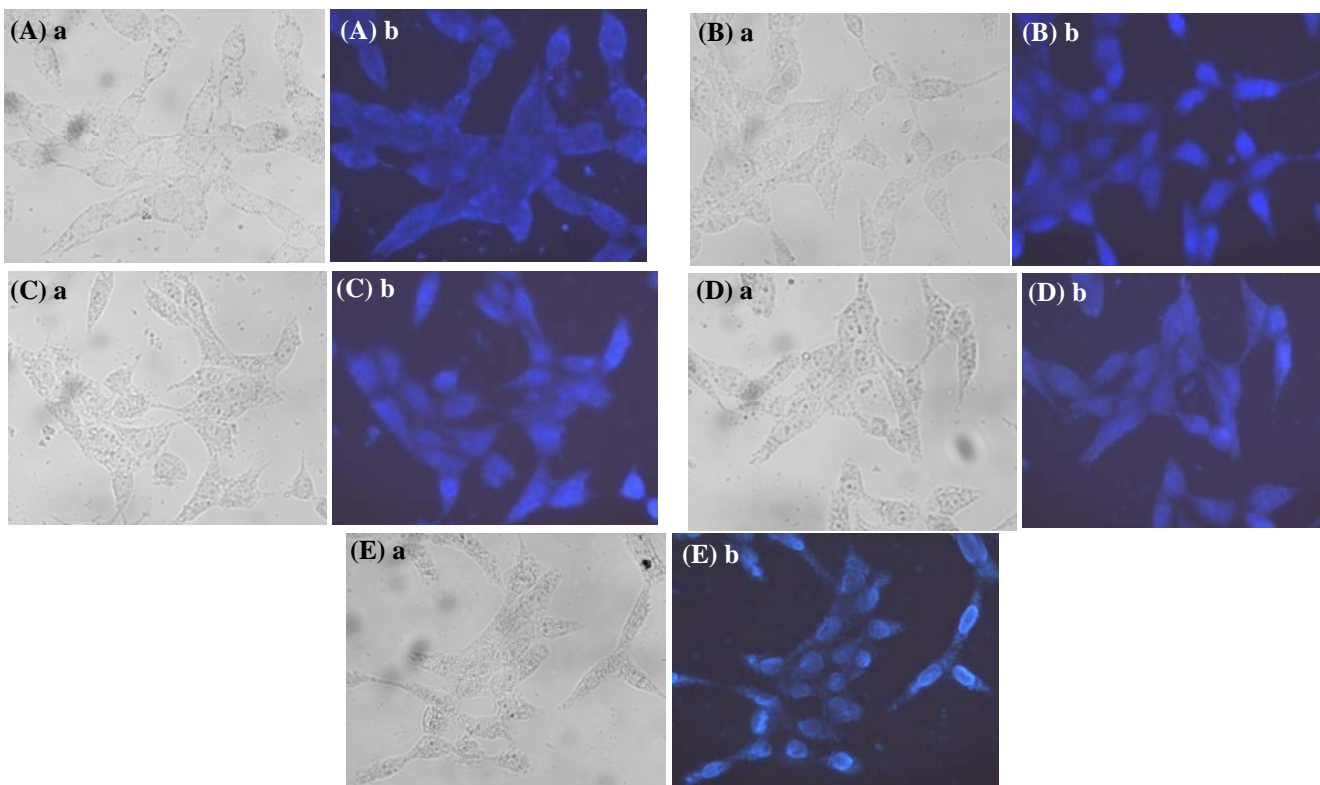

**Figure S14.** Fixed HeLa cells stained with – (A) receptor **1**, (B) receptor **3**, (C) receptor **4**, (D) receptor **2** and (E) Hoechst dye. a- bright-field mode, b- fluorescence mode.

## 17. Gel Retardation Assay (taking calf-thymus DNA)

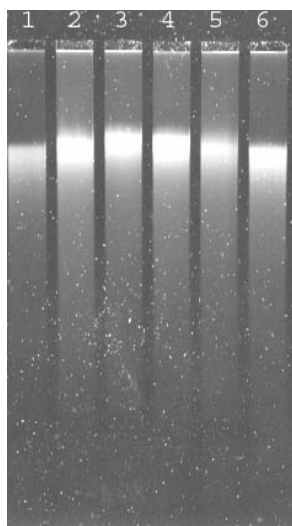

### Experimental procedure:

20  $\mu\text{M}$  of each receptors **1 - 4** was mixed with 0.46  $\mu\text{g}$  of calf-thymus DNA in Tris-EDTA (TE) buffer, pH-8 in separate microcentrifuge tubes and incubated for 25 minutes. All samples were loaded in 1.15% normal agarose gel after adding 1X gel loading dye and run in 1X Tris-acetate EDTA (TAE) buffer at constant 60 volt for 3 hrs. After staining with ethidium bromide (20  $\mu\text{g}/\mu\text{l}$ ) for 5 minutes it was observed under Typhon 9210 (Variable Mode Imager), GE Healthcare.

**Figure S15.** Changes in the agarose gel electrophoretic pattern of calf thymus DNA induced by all the four receptors. Lanes 1 and 6, DNA alone; lane 2 for receptor **1** (20 $\mu\text{M}$ ); lane 3 for receptor **3** (20 $\mu\text{M}$ ); lane 4 for receptor **4** (20 $\mu\text{M}$ ) and lane 5, receptor **2** (20 $\mu\text{M}$ ) respectively. The concentration of DNA used is 0.046 $\mu\text{g}/\mu\text{l}$ .

## 18. CD spectra of receptors 1 – 4.

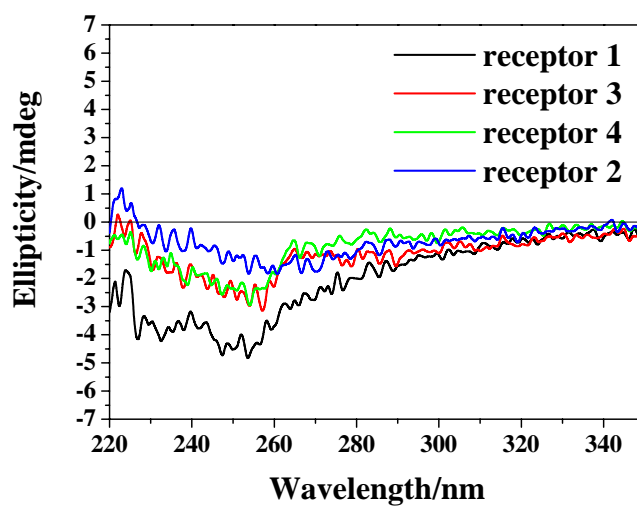

**Figure S16.** CD spectra of receptors 1 - 4 after buffer subtraction (20  $\mu$ M of each compound has been used for analysis).
